# Supplementary material for: Acute amyloid-β exposure disrupts insulin signaling in blood–brain barrier endothelial cell culture models
Source: Research Square preprint supplement (doi:10.21203/rs.3.rs-8436616/v1), 2026-01-12
Supplement: Supplementary file 1 [file 08e2b7427dc9e2131674523d.xlsx]

## Sheet: RawLog2
								Antibody Name	14-3-3-beta	14-3-3-zeta	4E-BP1	4E-BP1_pS65	53BP1	A-Raf	ACC1	ACC_pS79	ADAR1	Akt	Akt_pS473	Akt_pT308	AMPK-a2_pS345	AMPKa	AMPKa_pT172	Annexin-I	Annexin-VII	AR	ARID1A	Atg3	Atg7	ATM	ATM_pS1981	ATR_pS428	Aurora-B	Axl	b-Actin	b-Catenin	b-Catenin_pT41_S45	B-Raf	B-Raf_pS445	B7-H4	Bad_pS112	Bak	BAP1	Bax	Bcl-xL	Bcl2	Beclin	Bid	Bim
								Antibody Origin	R	R	R	R	R	R	R	R	M	R	R	R	R	R	R	M	M	R	R	R	R	R	R	R	R	R	R	R	R	R	R	R	R	R	M	R	R	M	R	R	R
								Gene Name	YWHAB	YWHAZ	EIF4EBP1	EIF4EBP1	TP53BP1	ARAF	ACACA/ ACACB	ACACA/ACACB	ADAR	AKT1/2/3	AKT1/2/3	AKT1/2/3	PRKAA2	PRKAA1/2	PRKAA1/2	ANXA1	ANXA7	AR	ARID1A	ATG3	ATG7	ATM	ATM	ATR	AURKB	AXL	ACTB	CTNNB1	CTNNB1	BRAF	BRAF	VTCN1	BAD	BAK1	BAP1	BAX	BCL2L1	BCL2	BECN1	BID	BCL2L11
								Validation Status	V	V	V	V	V	V	C	V	V	V	V	V	V	C	C	V	V	V	C	V	V	V	V	C	V	V	C	V	V	C	V	C	V	C	V	V	V	V	C	C	V
								Slide Id	GBL1144582	GBL1144583	GBL1144348	GBL1144349	GBL1144437	GBL1144487	GBL1144351	GBL1144350	GBL1144609	GBL1144660	GBL1144374	GBL1144474	GBL1144504	GBL1144352	GBL1144353	GBL1144612	GBL1144608	GBL1144565	GBL1144515	GBL1144523	GBL1144524	GBL1144506	GBL1144507	GBL1144546	GBL1144512	GBL1144497	GBL1144480	GBL1144357	GBL1144481	GBL1144559	GBL1144361	GBL1144541	GBL1144354	GBL1144355	GBL1144636	GBL1144356	GBL1144358	GBL1144624	GBL1144591	GBL1144359	GBL1144360
								Antibody Name in Heatmap	14-3-3-beta-R-V	14-3-3-zeta-R-V	4E-BP1-R-V	4E-BP1_pS65-R-V	53BP1-R-V	A-Raf-R-V	ACC1-R-C	ACC_pS79-R-V	ADAR1-M-V	Akt-R-V	Akt_pS473-R-V	Akt_pT308-R-V	AMPK-a2_pS345-R-V	AMPKa-R-C	AMPKa_pT172-R-C	Annexin-I-M-V	Annexin-VII-M-V	AR-R-V	ARID1A-R-C	Atg3-R-V	Atg7-R-V	ATM-R-V	ATM_pS1981-R-V	ATR_pS428-R-C	Aurora-B-R-V	Axl-R-V	b-Actin-R-C	b-Catenin-R-V	b-Catenin_pT41_S45-R-V	B-Raf-R-C	B-Raf_pS445-R-V	B7-H4-R-C	Bad_pS112-R-V	Bak-R-C	BAP1-M-V	Bax-R-V	Bcl-xL-R-V	Bcl2-M-V	Beclin-R-C	Bid-R-C	Bim-R-V
								Probabilities (QC Score)	0.928356	0.860142	0.951039	0.950514	0.952341	0.955901	0.955105	0.958116	0.916469	0.853838	0.95127	0.956545	0.862934	0.954887	0.967568	0.902441	0.92124	0.938634	0.966211	0.943151	0.966335	0.959059	0.884195	0.940566	0.933574	0.942243	0.875996	0.950027	0.933985	0.958581	0.958016	0.914757	0.935648	0.909787	0.918703	0.883895	0.917508	0.85358	0.889353	0.889503	0.887597
								Slide no.	1	2	3	4	5	6	7	8	9	10	11	12	13	14	15	16	17	18	19	20	21	22	23	24	25	26	27	28	29	30	31	32	33	34	35	36	37	38	39	40	41
Order	Sample Source	Category_1	Category_2	Category_3	Sample	Sample Name	Sample description	Sample Type	14-3-3-beta-R-V	14-3-3-zeta-R-V	4E-BP1-R-V	4E-BP1_pS65-R-V	53BP1-R-V	A-Raf-R-V	ACC1-R-C	ACC_pS79-R-V	ADAR1-M-V	Akt-R-V	Akt_pS473-R-V	Akt_pT308-R-V	AMPK-a2_pS345-R-V	AMPKa-R-C	AMPKa_pT172-R-C	Annexin-I-M-V	Annexin-VII-M-V	AR-R-V	ARID1A-R-C	Atg3-R-V	Atg7-R-V	ATM-R-V	ATM_pS1981-R-V	ATR_pS428-R-C	Aurora-B-R-V	Axl-R-V	b-Actin-R-C	b-Catenin-R-V	b-Catenin_pT41_S45-R-V	B-Raf-R-C	B-Raf_pS445-R-V	B7-H4-R-C	Bad_pS112-R-V	Bak-R-C	BAP1-M-V	Bax-R-V	Bcl-xL-R-V	Bcl2-M-V	Beclin-R-C	Bid-R-C	Bim-R-V
									RawLog2	RawLog2	RawLog2	RawLog2	RawLog2	RawLog2	RawLog2	RawLog2	RawLog2	RawLog2	RawLog2	RawLog2	RawLog2	RawLog2	RawLog2	RawLog2	RawLog2	RawLog2	RawLog2	RawLog2	RawLog2	RawLog2	RawLog2	RawLog2	RawLog2	RawLog2	RawLog2	RawLog2	RawLog2	RawLog2	RawLog2	RawLog2	RawLog2	RawLog2	RawLog2	RawLog2	RawLog2	RawLog2	RawLog2	RawLog2	RawLog2
645	Sunil Krishnan-B (Pankaj Singh-B)	28_Sunil_Krishnan-B__Pankaj_Singh-B			sample	Sunil_Krishnan-B__Pankaj_Singh-B_1	1_1A_untreated	human cell line	-1.87384	-2.46111	-1.62614	-1.34248	-1.35638	-1.60262	-0.938037	-3.03934	-0.514854	0.370145	-2.95017	-2.04547	-3.02643	-1.21278	0.53551	-0.654903	-0.887936	-3.60079	-1.7297	-1.39	-0.871125	-1.22177	-3.26578	-2.03084	-2.60398	0.440636	-1.68955	-1.39303	-1.28027	-1.98026	-1.81059	-3.22459	-2.31514	-2.28612	-1.53097	-1.21603	-1.58918	-3.64103	-2.25475	-2.22297	-3.26062
646	Sunil Krishnan-B (Pankaj Singh-B)	28_Sunil_Krishnan-B__Pankaj_Singh-B			sample	Sunil_Krishnan-B__Pankaj_Singh-B_2	2_1B_untreated	human cell line	-1.8004	-2.46075	-1.58049	-1.26702	-1.2871	-1.59324	-0.8725	-2.92288	-0.345255	0.317352	-2.86766	-2.11096	-2.7583	-1.21565	0.612475	-0.598662	-0.949841	-3.70717	-1.56429	-1.42499	-0.820294	-1.19765	-3.30214	-2.06003	-2.59024	0.600051	-1.59452	-1.22959	-1.24703	-1.96253	-1.72512	-3.20172	-2.36794	-2.21265	-1.56081	-1.18179	-1.48219	-3.73679	-2.22251	-2.14708	-3.09617
647	Sunil Krishnan-B (Pankaj Singh-B)	28_Sunil_Krishnan-B__Pankaj_Singh-B			sample	Sunil_Krishnan-B__Pankaj_Singh-B_3	3_1C_untreated	human cell line	-1.80434	-2.47417	-1.64048	-1.25907	-1.29718	-1.56043	-0.896906	-2.85494	-0.305164	0.474309	-2.74357	-1.93149	-2.90877	-1.17314	0.565795	-0.590271	-0.854139	-3.56785	-1.25413	-1.36246	-0.728364	-1.25495	-3.23082	-2.00981	-2.57125	0.52611	-1.68291	-1.30635	-1.24347	-2.01152	-1.70653	-3.21242	-2.1989	-2.16678	-1.63201	-1.20359	-1.44188	-3.65045	-2.19899	-2.10584	-3.17815
648	Sunil Krishnan-B (Pankaj Singh-B)	28_Sunil_Krishnan-B__Pankaj_Singh-B			sample	Sunil_Krishnan-B__Pankaj_Singh-B_4	4_2A_Insulin (100 nM)	human cell line	-1.47581	-2.12569	-1.07712	-0.857121	-0.995953	-1.16679	-0.4282	-2.65045	0.123914	1.27036	-0.76877	-0.762602	-2.55693	-0.794096	0.634537	-0.217753	-0.643995	-3.28231	-1.01172	-1.20556	-0.459856	-0.760909	-3.12508	-1.80229	-2.39168	0.928674	-1.27933	-0.810226	-0.865208	-1.48997	-1.17727	-2.79822	-1.52885	-1.76356	-1.13122	-0.907578	-1.04888	-3.27133	-2.08919	-1.58852	-2.76318
667	Sunil Krishnan-B (Pankaj Singh-B)	28_Sunil_Krishnan-B__Pankaj_Singh-B			sample	Sunil_Krishnan-B__Pankaj_Singh-B_5	5_2B_Insulin (100 nM)	human cell line	-1.51183	-1.81576	-1.06868	-0.847773	-0.946643	-1.2303	-0.43835	-2.76499	-0.101318	0.725458	-0.774096	-0.757964	-2.47225	-0.834269	0.668004	-0.304083	-0.588161	-3.29024	-1.04761	-1.19002	-0.541611	-0.800602	-2.98413	-1.77927	-2.35631	0.927187	-1.33857	-0.834216	-0.890584	-1.37199	-1.277	-2.62563	-1.58657	-1.84059	-1.02887	-0.905149	-1.0703	-3.35313	-1.98891	-1.6023	-2.80928
668	Sunil Krishnan-B (Pankaj Singh-B)	28_Sunil_Krishnan-B__Pankaj_Singh-B			sample	Sunil_Krishnan-B__Pankaj_Singh-B_6	6_2C_Insulin (100 nM)	human cell line	-1.46659	-1.82353	-1.08047	-0.894247	-0.915002	-1.18036	-0.501082	-2.61914	-0.0683677	0.835029	-0.843831	-0.779648	-2.43997	-0.836323	0.685978	-0.335103	-0.546394	-3.1706	-0.621202	-1.16807	-0.472081	-0.795757	-2.978	-1.73262	-2.24677	0.8411	-1.37764	-1.41447	-0.91714	-1.18131	-1.2852	-2.62853	-1.4823	-1.74514	-1.04198	-0.956648	-1.07048	-3.34138	-2.01952	-1.57708	-2.82498
669	Sunil Krishnan-B (Pankaj Singh-B)	28_Sunil_Krishnan-B__Pankaj_Singh-B			sample	Sunil_Krishnan-B__Pankaj_Singh-B_7	7_3A_Abeta 40 (1hr)	human cell line	-1.77648	-2.22759	-1.39909	-1.16592	-1.21414	-1.47137	-0.773169	-3.29925	-0.379355	0.496109	-1.9978	-1.4066	-2.804	-1.08605	0.0723909	-0.495696	-0.865622	-3.49859	-1.50269	-1.32346	-0.751737	-1.04185	-3.20096	-1.96872	-2.56727	0.640067	-1.57908	-1.25681	-1.16484	-1.69085	-1.64173	-3.09654	-2.03135	-2.15461	-1.38032	-1.09709	-1.3497	-3.70648	-2.24096	-1.96249	-3.16906
670	Sunil Krishnan-B (Pankaj Singh-B)	28_Sunil_Krishnan-B__Pankaj_Singh-B			sample	Sunil_Krishnan-B__Pankaj_Singh-B_8	8_3B_Abeta 40 (1hr)	human cell line	-1.77727	-2.43483	-1.61073	-1.24471	-1.31846	-1.54825	-0.750258	-3.42885	-0.356664	0.405197	-2.08539	-1.51362	-2.67896	-1.18764	-0.162792	-0.611322	-0.864472	-3.63876	-1.83572	-1.35148	-0.814926	-1.09386	-3.32186	-1.99728	-2.59465	0.480618	-1.59844	-1.36669	-1.17176	-1.9865	-1.67454	-3.14739	-2.24658	-2.20092	-1.51855	-1.17087	-1.51338	-3.75114	-2.21238	-2.08614	-3.13506
671	Sunil Krishnan-B (Pankaj Singh-B)	28_Sunil_Krishnan-B__Pankaj_Singh-B			sample	Sunil_Krishnan-B__Pankaj_Singh-B_9	9_3C_Abeta 40 (1hr)	human cell line	-1.59619	-2.25495	-1.36954	-1.12408	-1.31422	-1.45925	-0.619343	-3.05459	-0.195688	0.571999	-2.02083	-1.53726	-2.66014	-1.05001	0.194661	-0.501199	-0.75847	-3.49818	-1.1256	-1.29509	-0.654454	-1.05055	-3.18902	-1.89515	-2.55483	0.666828	-1.469	-1.03662	-1.11809	-1.82677	-1.47565	-3.01609	-2.04323	-2.07293	-1.43988	-1.0766	-1.27256	-3.57165	-2.08747	-1.95095	-3.05804
672	Sunil Krishnan-B (Pankaj Singh-B)	28_Sunil_Krishnan-B__Pankaj_Singh-B			sample	Sunil_Krishnan-B__Pankaj_Singh-B_10	10_4A_Abeta 40 + Insulin	human cell line	-1.80678	-2.43137	-1.53954	-1.14088	-1.20496	-1.42368	-0.691594	-2.68703	-0.122275	1.04533	-1.58225	-1.15604	-2.58246	-1.0465	0.745501	-0.430079	-0.7463	-3.46137	-1.28938	-1.30953	-0.703562	-0.973779	-3.22459	-1.96165	-2.58535	0.699361	-1.56365	-0.987787	-1.19262	-1.70102	-1.43841	-3.16718	-1.95838	-2.11387	-1.58553	-1.04834	-1.42927	-3.76499	-2.54239	-2.04437	-2.97708
691	Sunil Krishnan-B (Pankaj Singh-B)	28_Sunil_Krishnan-B__Pankaj_Singh-B			sample	Sunil_Krishnan-B__Pankaj_Singh-B_11	11_4B_Abeta 40 + Insulin	human cell line	-1.59223	-2.04305	-1.316	-0.979331	-1.02508	-1.34394	-0.606982	-2.51517	-0.119689	0.561942	-1.50775	-1.09199	-2.58822	-0.951601	0.835471	-0.370118	-0.667401	-3.30507	-1.07189	-1.26862	-0.683109	-0.924499	-3.25361	-1.86718	-2.48745	0.747676	-1.28178	-0.908805	-1.09905	-1.56475	-1.43789	-2.72073	-1.87203	-2.06733	-1.14253	-0.974845	-1.31039	-3.51255	-2.3148	-1.89759	-2.9728
692	Sunil Krishnan-B (Pankaj Singh-B)	28_Sunil_Krishnan-B__Pankaj_Singh-B			sample	Sunil_Krishnan-B__Pankaj_Singh-B_12	12_4C_Abeta 40 + Insulin	human cell line	-1.55729	-2.05353	-1.43014	-1.03873	-1.2324	-1.36828	-0.677476	-2.52993	-0.295181	0.495055	-1.63736	-1.14212	-2.47174	-0.996502	0.875505	-0.409184	-0.724682	-3.29113	-1.02269	-1.27382	-0.606728	-0.911178	-3.16861	-1.8513	-2.46216	0.775341	-1.43478	-1.22644	-1.08829	-1.53504	-1.54321	-2.81695	-1.80197	-2.0733	-1.1782	-1.03721	-1.40828	-3.4952	-2.15126	-1.94991	-2.94201
693	Sunil Krishnan-B (Pankaj Singh-B)	28_Sunil_Krishnan-B__Pankaj_Singh-B			sample	Sunil_Krishnan-B__Pankaj_Singh-B_13	13_5A_Abeta 42 (1hr)	human cell line	-1.49749	-2.17574	-1.24218	-1.01558	-1.13757	-1.28739	-0.449761	-2.97517	-0.122444	0.578622	-2.45834	-1.61258	-2.61891	-0.887457	0.668035	-0.724657	-0.64842	-3.41437	-1.09	-1.27395	-0.653877	-0.945213	-3.10407	-1.87072	-2.46338	0.79073	-1.37262	-0.989824	-1.10215	-1.48817	-1.41915	-2.78762	-1.8318	-2.03779	-1.0611	-0.987429	-1.27393	-3.5412	-2.00073	-2.01847	-2.9161
694	Sunil Krishnan-B (Pankaj Singh-B)	28_Sunil_Krishnan-B__Pankaj_Singh-B			sample	Sunil_Krishnan-B__Pankaj_Singh-B_14	14_5B_Abeta 42 (1hr)	human cell line	-1.66118	-2.15478	-1.29997	-1.07026	-1.11566	-1.2808	-0.477748	-2.85856	-0.144003	0.631002	-2.5122	-1.61677	-2.62458	-0.926991	0.755254	-0.544333	-0.643324	-3.34996	-1.40435	-1.21464	-0.635004	-0.86661	-3.16015	-1.88888	-2.48235	0.826335	-1.29571	-0.88026	-1.02852	-1.73558	-1.34305	-2.77299	-1.91676	-1.99496	-1.18025	-0.987981	-1.2152	-3.50049	-1.98534	-1.81346	-2.84333
695	Sunil Krishnan-B (Pankaj Singh-B)	28_Sunil_Krishnan-B__Pankaj_Singh-B			sample	Sunil_Krishnan-B__Pankaj_Singh-B_15	15_5C_Abeta 42 (1hr)	human cell line	-1.4837	-2.19202	-1.28293	-0.984138	-1.11677	-1.33088	-0.447172	-2.69617	-0.0220103	0.735433	-2.47684	-1.57612	-2.50557	-0.868991	0.735084	-0.390186	-0.614818	-3.40729	-1.08098	-1.2336	-0.499571	-0.796827	-3.1007	-1.84495	-2.46855	0.943141	-1.27543	-0.820513	-0.903213	-1.63883	-1.30554	-2.79504	-1.7859	-1.80323	-1.20046	-0.97688	-1.09249	-3.44668	-1.96304	-1.88652	-2.90787
696	Sunil Krishnan-B (Pankaj Singh-B)	28_Sunil_Krishnan-B__Pankaj_Singh-B			sample	Sunil_Krishnan-B__Pankaj_Singh-B_16	16_6A_Abeta 42 + Insulin	human cell line	-1.55266	-2.18898	-1.30472	-1.00427	-1.04342	-1.22891	-0.510413	-2.88338	0.0368154	1.22384	-0.755924	-0.743928	-2.46378	-0.886892	0.39677	-0.323587	-0.650022	-3.31406	-1.55339	-1.26348	-0.589416	-0.899678	-2.98646	-1.84172	-2.47462	0.81709	-1.37242	-0.860819	-1.03575	-1.67407	-1.27794	-2.76032	-1.77848	-1.95419	-1.21928	-0.927113	-1.2478	-3.50959	-1.97274	-1.82343	-2.83796
716	Sunil Krishnan-B (Pankaj Singh-B)	28_Sunil_Krishnan-B__Pankaj_Singh-B			sample	Sunil_Krishnan-B__Pankaj_Singh-B_17	17_6B_Abeta 42 + Insulin	human cell line	-1.61315	-2.20441	-1.50818	-1.04891	-1.18829	-1.3189	-0.726293	-2.89144	-0.211431	0.537198	-0.878238	-0.774007	-2.54574	-0.96946	0.351349	-0.423814	-0.629926	-3.44181	-1.3668	-1.25623	-0.590555	-0.902247	-3.23936	-1.83117	-2.52393	0.568365	-1.39217	-1.00875	-0.896363	-1.69285	-1.5536	-2.79889	-1.86324	-2.10353	-1.19535	-1.0018	-1.57476	-3.37423	-2.09892	-2.13227	-2.84045
717	Sunil Krishnan-B (Pankaj Singh-B)	28_Sunil_Krishnan-B__Pankaj_Singh-B			sample	Sunil_Krishnan-B__Pankaj_Singh-B_18	18_6C_Abeta 42 + Insulin	human cell line	-1.71691	-2.26825	-1.48682	-1.08677	-1.11703	-1.39022	-0.846356	-3.05142	-0.205574	0.584137	-0.835963	-0.827807	-2.57884	-0.989674	0.229147	-0.598251	-0.786986	-3.50663	-1.26211	-1.31382	-0.698315	-0.999024	-3.25035	-2.04405	-2.79016	0.508253	-1.40628	-1.07098	-1.12392	-1.8107	-1.53411	-3.08514	-1.84912	-2.07384	-1.2196	-0.971302	-1.65545	-3.64195	-2.1339	-2.08593	-2.96325
718	Sunil Krishnan-B (Pankaj Singh-B)	28_Sunil_Krishnan-B__Pankaj_Singh-B			sample	Sunil_Krishnan-B__Pankaj_Singh-B_19	19_7A_Vehicle	human cell line	-1.26335	-1.60108	-0.649276	-0.712139	-0.704914	-1.02638	-0.166476	-2.39406	0.17565	1.32679	-1.27543	-0.838106	-2.21593	-0.493897	0.440824	0.0642279	-0.324059	-2.6416	-0.877276	-0.947539	-0.224602	-0.352068	-2.56321	-1.46427	-2.22355	1.21133	-1.02738	-0.467609	-0.663647	-0.984364	-0.857136	-2.44681	-1.34882	-1.58606	-0.898013	-0.599356	-0.939898	-3.23112	-1.76927	-1.33912	-2.43343
719	Sunil Krishnan-B (Pankaj Singh-B)	28_Sunil_Krishnan-B__Pankaj_Singh-B			sample	Sunil_Krishnan-B__Pankaj_Singh-B_20	20_7B_Vehicle	human cell line	-1.34029	-1.80761	-0.824059	-0.761236	-0.784856	-1.21593	-0.210545	-2.53746	0.249573	1.32324	-1.43578	-1.02529	-2.21715	-0.612021	0.231837	-0.117683	-0.438534	-3.02945	-0.614732	-1.09929	-0.224887	-0.547507	-2.88876	-1.66003	-2.28564	1.15299	-1.05098	-0.523629	-0.745821	-1.17079	-0.974207	-2.57345	-1.48016	-1.63181	-1.12717	-0.719595	-0.942878	-3.259	-1.87399	-1.48107	-2.5909
720	Sunil Krishnan-B (Pankaj Singh-B)	28_Sunil_Krishnan-B__Pankaj_Singh-B			sample	Sunil_Krishnan-B__Pankaj_Singh-B_21	21_7C_Vehicle	human cell line	-1.36943	-1.84785	-0.99973	-0.764832	-0.855138	-1.09371	-0.208432	-2.61078	0.282813	1.39233	-1.59864	-1.06929	-2.40837	-0.643037	0.26853	-0.119508	-0.466425	-3.05137	-0.969942	-1.12325	-0.268549	-0.558708	-2.92624	-1.73881	-2.29601	1.06424	-1.14079	-0.576002	-0.746053	-1.23176	-0.988737	-2.58638	-1.48988	-1.62189	-1.03337	-0.719145	-0.982819	-3.19104	-1.9033	-1.48845	-2.6369
[truncated: 265 more columns]

## Sheet: NormLinear
								Antibody Name	14-3-3-beta	14-3-3-zeta	4E-BP1	4E-BP1_pS65	53BP1	A-Raf	ACC1	ACC_pS79	ADAR1	Akt	Akt_pS473	Akt_pT308	AMPK-a2_pS345	AMPKa	AMPKa_pT172	Annexin-I	Annexin-VII	AR	ARID1A	Atg3	Atg7	ATM	ATM_pS1981	ATR_pS428	Aurora-B	Axl	b-Actin	b-Catenin	b-Catenin_pT41_S45	B-Raf	B-Raf_pS445	B7-H4	Bad_pS112	Bak	BAP1	Bax	Bcl-xL	Bcl2	Beclin	Bid	Bim
								Antibody Origin	R	R	R	R	R	R	R	R	M	R	R	R	R	R	R	M	M	R	R	R	R	R	R	R	R	R	R	R	R	R	R	R	R	R	M	R	R	M	R	R	R
								Gene Name	YWHAB	YWHAZ	EIF4EBP1	EIF4EBP1	TP53BP1	ARAF	ACACA/ ACACB	ACACA/ACACB	ADAR	AKT1/2/3	AKT1/2/3	AKT1/2/3	PRKAA2	PRKAA1/2	PRKAA1/2	ANXA1	ANXA7	AR	ARID1A	ATG3	ATG7	ATM	ATM	ATR	AURKB	AXL	ACTB	CTNNB1	CTNNB1	BRAF	BRAF	VTCN1	BAD	BAK1	BAP1	BAX	BCL2L1	BCL2	BECN1	BID	BCL2L11
								Validation Status	V	V	V	V	V	V	C	V	V	V	V	V	V	C	C	V	V	V	C	V	V	V	V	C	V	V	C	V	V	C	V	C	V	C	V	V	V	V	C	C	V
								Slide Id	GBL1144582	GBL1144583	GBL1144348	GBL1144349	GBL1144437	GBL1144487	GBL1144351	GBL1144350	GBL1144609	GBL1144660	GBL1144374	GBL1144474	GBL1144504	GBL1144352	GBL1144353	GBL1144612	GBL1144608	GBL1144565	GBL1144515	GBL1144523	GBL1144524	GBL1144506	GBL1144507	GBL1144546	GBL1144512	GBL1144497	GBL1144480	GBL1144357	GBL1144481	GBL1144559	GBL1144361	GBL1144541	GBL1144354	GBL1144355	GBL1144636	GBL1144356	GBL1144358	GBL1144624	GBL1144591	GBL1144359	GBL1144360
								Antibody Name in Heatmap	14-3-3-beta-R-V	14-3-3-zeta-R-V	4E-BP1-R-V	4E-BP1_pS65-R-V	53BP1-R-V	A-Raf-R-V	ACC1-R-C	ACC_pS79-R-V	ADAR1-M-V	Akt-R-V	Akt_pS473-R-V	Akt_pT308-R-V	AMPK-a2_pS345-R-V	AMPKa-R-C	AMPKa_pT172-R-C	Annexin-I-M-V	Annexin-VII-M-V	AR-R-V	ARID1A-R-C	Atg3-R-V	Atg7-R-V	ATM-R-V	ATM_pS1981-R-V	ATR_pS428-R-C	Aurora-B-R-V	Axl-R-V	b-Actin-R-C	b-Catenin-R-V	b-Catenin_pT41_S45-R-V	B-Raf-R-C	B-Raf_pS445-R-V	B7-H4-R-C	Bad_pS112-R-V	Bak-R-C	BAP1-M-V	Bax-R-V	Bcl-xL-R-V	Bcl2-M-V	Beclin-R-C	Bid-R-C	Bim-R-V
								Probabilities (QC Score)	0.928356	0.860142	0.951039	0.950514	0.952341	0.955901	0.955105	0.958116	0.916469	0.853838	0.95127	0.956545	0.862934	0.954887	0.967568	0.902441	0.92124	0.938634	0.966211	0.943151	0.966335	0.959059	0.884195	0.940566	0.933574	0.942243	0.875996	0.950027	0.933985	0.958581	0.958016	0.914757	0.935648	0.909787	0.918703	0.883895	0.917508	0.85358	0.889353	0.889503	0.887597
								Slide no.	1	2	3	4	5	6	7	8	9	10	11	12	13	14	15	16	17	18	19	20	21	22	23	24	25	26	27	28	29	30	31	32	33	34	35	36	37	38	39	40	41
Order	Sample Source	Category_1	Category_2	Category_3	CF1&2 Outliers	Sample Name	Sample description	Sample Type	14-3-3-beta-R-V	14-3-3-zeta-R-V	4E-BP1-R-V	4E-BP1_pS65-R-V	53BP1-R-V	A-Raf-R-V	ACC1-R-C	ACC_pS79-R-V	ADAR1-M-V	Akt-R-V	Akt_pS473-R-V	Akt_pT308-R-V	AMPK-a2_pS345-R-V	AMPKa-R-C	AMPKa_pT172-R-C	Annexin-I-M-V	Annexin-VII-M-V	AR-R-V	ARID1A-R-C	Atg3-R-V	Atg7-R-V	ATM-R-V	ATM_pS1981-R-V	ATR_pS428-R-C	Aurora-B-R-V	Axl-R-V	b-Actin-R-C	b-Catenin-R-V	b-Catenin_pT41_S45-R-V	B-Raf-R-C	B-Raf_pS445-R-V	B7-H4-R-C	Bad_pS112-R-V	Bak-R-C	BAP1-M-V	Bax-R-V	Bcl-xL-R-V	Bcl2-M-V	Beclin-R-C	Bid-R-C	Bim-R-V
									NormLinear	NormLinear	NormLinear	NormLinear	NormLinear	NormLinear	NormLinear	NormLinear	NormLinear	NormLinear	NormLinear	NormLinear	NormLinear	NormLinear	NormLinear	NormLinear	NormLinear	NormLinear	NormLinear	NormLinear	NormLinear	NormLinear	NormLinear	NormLinear	NormLinear	NormLinear	NormLinear	NormLinear	NormLinear	NormLinear	NormLinear	NormLinear	NormLinear	NormLinear	NormLinear	NormLinear	NormLinear	NormLinear	NormLinear	NormLinear	NormLinear
645	Sunil Krishnan-B (Pankaj Singh-B)	28_Sunil_Krishnan-B__Pankaj_Singh-B			nominal	Sunil_Krishnan-B__Pankaj_Singh-B_1	1_1A_untreated	human cell line	0.994575	1.00113	0.975096	0.979422	1.02414	1.0014	0.961063	1.06389	0.921047	1.0423	0.473759	0.646356	0.886479	1.00876	1.18384	1.03002	1.02516	1.05721	0.795345	1.1114	1.02643	0.974794	1.13021	1.0793	1.11121	0.958634	0.973903	0.914179	1.05832	0.977764	0.933715	0.899618	0.875227	1.03883	0.958027	1.0318	0.97165	1.10368	1.07788	1.00048	0.952132
646	Sunil Krishnan-B (Pankaj Singh-B)	28_Sunil_Krishnan-B__Pankaj_Singh-B			nominal	Sunil_Krishnan-B__Pankaj_Singh-B_2	2_1B_untreated	human cell line	1.01196	0.968322	0.973222	0.997952	1.03905	0.974661	0.972528	1.11527	1.00175	0.971676	0.485085	0.597283	1.0323	0.973518	1.20749	1.03561	0.949679	0.949635	0.862526	1.04895	1.02814	0.958506	1.0657	1.02277	1.08481	1.03529	1.00588	0.990047	1.04724	0.957184	0.958002	0.883821	0.815923	1.05702	0.907436	1.0217	1.0119	0.998707	1.06585	1.01971	1.03187
647	Sunil Krishnan-B (Pankaj Singh-B)	28_Sunil_Krishnan-B__Pankaj_Singh-B			nominal	Sunil_Krishnan-B__Pankaj_Singh-B_3	3_1C_untreated	human cell line	1.00067	0.951241	0.925687	0.994971	1.02308	0.988645	0.948125	1.15915	1.02126	1.07419	0.524183	0.67068	0.922193	0.994147	1.15915	1.03284	1.00623	1.03707	1.06035	1.08616	1.08652	0.91339	1.11024	1.05005	1.08989	0.975249	0.938094	0.9308	1.04094	0.917396	0.962216	0.869873	0.909589	1.08194	0.856432	0.997863	1.03177	1.05133	1.0742	1.0404	0.966621
648	Sunil Krishnan-B (Pankaj Singh-B)	28_Sunil_Krishnan-B__Pankaj_Singh-B			nominal	Sunil_Krishnan-B__Pankaj_Singh-B_4	4_2A_Insulin (100 nM)	human cell line	0.984133	0.948552	1.07132	1.02962	0.987318	1.0172	1.02761	1.04608	1.07689	1.46077	1.61371	1.18101	0.92173	1.01256	0.952143	1.04722	0.91164	0.989992	0.982404	0.948396	1.02502	1.0075	0.935648	0.949608	0.966728	1.00964	0.971858	1.02819	1.05965	1.0314	1.08758	0.907839	1.13349	1.12061	0.949104	0.959503	1.0611	1.07086	0.907839	1.16627	1.00935
667	Sunil Krishnan-B (Pankaj Singh-B)	28_Sunil_Krishnan-B__Pankaj_Singh-B			nominal	Sunil_Krishnan-B__Pankaj_Singh-B_5	5_2B_Insulin (100 nM)	human cell line	0.973643	1.19275	1.09308	1.05119	1.03631	0.98736	1.03505	0.980105	0.934451	1.01564	1.63084	1.20182	0.991475	0.99889	0.988473	1.00055	0.961212	0.998691	0.972015	0.972429	0.982451	0.994223	1.04648	0.978727	1.00494	1.02307	0.946149	1.02575	1.05612	1.13535	1.02951	1.03789	1.10466	1.07758	1.03351	0.974913	1.06046	1.02636	0.98715	1.17176	0.991639
668	Sunil Krishnan-B (Pankaj Singh-B)	28_Sunil_Krishnan-B__Pankaj_Singh-B			nominal	Sunil_Krishnan-B__Pankaj_Singh-B_6	6_2C_Insulin (100 nM)	human cell line	0.986405	1.16478	1.06448	0.99937	1.04004	1.00357	0.972998	1.06467	0.938668	1.07587	1.52565	1.16238	0.99549	0.979344	0.98268	0.961475	0.971467	1.06533	1.28254	0.969394	1.01223	0.979441	1.03184	0.992526	1.06451	0.9463	0.904135	0.673599	1.01801	1.27223	1.00507	1.01699	1.16589	1.13037	1.00555	0.923632	1.04106	1.01594	0.948868	1.17076	0.963083
669	Sunil Krishnan-B (Pankaj Singh-B)	28_Sunil_Krishnan-B__Pankaj_Singh-B			nominal	Sunil_Krishnan-B__Pankaj_Singh-B_7	7_3A_Abeta 40 (1hr)	human cell line	0.976403	1.08011	1.04733	1.01579	1.03719	1.00647	0.988702	0.815347	0.928443	1.04374	0.841268	0.923583	0.949101	1.0107	0.788068	1.05549	0.955412	1.04138	0.854231	1.06803	1.02318	1.01334	1.08482	1.03402	1.046	1.01012	0.964836	0.921982	1.05208	1.09658	0.96323	0.902175	0.977767	1.04428	0.975916	1.02821	1.05265	0.967884	0.998629	1.09978	0.930986
670	Sunil Krishnan-B (Pankaj Singh-B)	28_Sunil_Krishnan-B__Pankaj_Singh-B			nominal	Sunil_Krishnan-B__Pankaj_Singh-B_8	8_3B_Abeta 40 (1hr)	human cell line	1.00973	0.968052	0.935802	0.995174	0.998322	0.987355	1.03938	0.771158	0.975887	1.01401	0.819185	0.887305	1.07094	0.974656	0.692756	1.008	0.989352	0.977747	0.70168	1.08384	1.01332	1.01138	1.03223	1.04892	1.06194	0.935807	0.98501	0.884014	1.08338	0.92439	0.97424	0.901148	0.871481	1.04639	0.917518	1.01085	0.972357	0.97094	1.05396	1.04447	0.986266
671	Sunil Krishnan-B (Pankaj Singh-B)	28_Sunil_Krishnan-B__Pankaj_Singh-B			nominal	Sunil_Krishnan-B__Pankaj_Singh-B_9	9_3C_Abeta 40 (1hr)	human cell line	1.05565	1.01124	1.01999	0.997745	0.923321	0.968431	1.04952	0.921746	1.00615	1.04969	0.78999	0.804939	1.00055	0.988753	0.818447	1.00327	0.981899	0.993923	1.05855	1.03931	1.04438	0.961078	1.04369	1.03823	1.00669	0.981855	0.993601	1.02477	1.03691	0.952235	1.03121	0.910179	0.925293	1.05445	0.893516	0.99511	1.05955	1.01399	1.05982	1.05779	0.959366
672	Sunil Krishnan-B (Pankaj Singh-B)	28_Sunil_Krishnan-B__Pankaj_Singh-B			nominal	Sunil_Krishnan-B__Pankaj_Singh-B_10	10_4A_Abeta 40 + Insulin	human cell line	0.923136	0.905493	0.917399	0.997931	1.00781	1.00442	1.01014	1.20336	1.07128	1.47463	1.08339	1.06086	1.06846	1.00296	1.21324	1.06651	1.002	1.03174	0.956193	1.0412	1.02144	1.02566	1.03039	1.00326	0.997345	1.0162	0.941579	1.07266	0.99642	1.05132	1.07076	0.829437	0.993019	1.03714	0.817322	1.02687	0.961803	0.897364	0.78239	1.00326	1.02682
691	Sunil Krishnan-B (Pankaj Singh-B)	28_Sunil_Krishnan-B__Pankaj_Singh-B			nominal	Sunil_Krishnan-B__Pankaj_Singh-B_11	11_4B_Abeta 40 + Insulin	human cell line	1	1.10644	1	1.04203	1.06581	0.990992	1	1.26555	1.00191	0.984733	1.06503	1.03536	0.993515	1	1.20554	1.03792	0.988026	1.07342	1.03793	1	0.967206	0.990808	0.942789	1	0.996473	0.981007	1.06871	1.05776	0.99257	1.07872	1	1.05518	0.984242	1	1.03729	1.00876	0.97504	0.99795	0.855231	1.03693	0.96146
692	Sunil Krishnan-B (Pankaj Singh-B)	28_Sunil_Krishnan-B__Pankaj_Singh-B			nominal	Sunil_Krishnan-B__Pankaj_Singh-B_12	12_4C_Abeta 40 + Insulin	human cell line	1.02452	1.09844	0.923934	1	0.923148	0.974411	0.952311	1.25267	0.887158	0.940121	0.973523	1	1.07706	0.969356	1.23946	1.01019	0.949566	1.08385	1.07394	0.996397	1.01979	1	1	1.01107	1.0141	1	0.961173	0.848736	1	1.10116	0.929597	0.9871	1.03322	0.995873	1.01196	0.966082	0.911077	1.01003	0.957889	1	0.982202
693	Sunil Krishnan-B (Pankaj Singh-B)	28_Sunil_Krishnan-B__Pankaj_Singh-B			nominal	Sunil_Krishnan-B__Pankaj_Singh-B_13	13_5A_Abeta 42 (1hr)	human cell line	1.05993	1.00171	1.04467	1.00861	0.978533	1.02294	1.10684	0.913193	0.992561	0.988774	0.546969	0.716366	0.96537	1.03769	1.06545	0.805739	0.993663	0.9877	1.01735	0.988901	0.979661	0.969419	1.03797	0.990129	1.0057	1.00321	0.996021	0.992561	0.983073	1.12906	1.00554	0.999879	1.00454	1.0131	1.08936	0.992561	0.992561	0.971049	1.05532	0.946494	0.992561
694	Sunil Krishnan-B (Pankaj Singh-B)	28_Sunil_Krishnan-B__Pankaj_Singh-B			nominal	Sunil_Krishnan-B__Pankaj_Singh-B_14	14_5B_Abeta 42 (1hr)	human cell line	0.939915	1.00958	0.996949	0.964611	0.986867	1.02076	1.07832	0.983459	0.971305	1.01848	0.523404	0.709514	0.955157	1.00289	1.12429	0.906914	0.990517	1.0259	0.812706	1.02351	0.985929	1.01686	0.991732	0.971211	0.985929	1.0214	1.04354	1.06372	1.02763	0.944776	1.05292	1.00332	0.940771	1.03665	0.996301	0.985551	1.02689	0.992173	1.05951	1.08373	1.03694
695	Sunil Krishnan-B (Pankaj Singh-B)	28_Sunil_Krishnan-B__Pankaj_Singh-B			nominal	Sunil_Krishnan-B__Pankaj_Singh-B_15	15_5C_Abeta 42 (1hr)	human cell line	1.03465	0.957646	0.981922	0.996676	0.959845	0.959668	1.07208	1.07131	1.02886	1.06578	0.522103	0.71035	1.00966	1.01622	1.07915	0.9823	0.983373	0.959668	0.989812	0.983242	1.05412	1.03883	1.00593	0.97457	0.968891	1.07804	1.03013	1.07917	1.09102	0.983397	1.05187	0.961788	1.00265	1.15245	0.956278	0.96671	1.08828	1.00244	1.04736	1.00278	0.965158
696	Sunil Krishnan-B (Pankaj Singh-B)	28_Sunil_Krishnan-B__Pankaj_Singh-B			nominal	Sunil_Krishnan-B__Pankaj_Singh-B_16	16_6A_Abeta 42 + Insulin	human cell line	0.984835	0.95819	0.965714	0.981353	1.00835	1.02837	1.02452	0.939486	1.07002	1.49287	1.71844	1.26275	1.03773	1.00215	0.852256	1.02712	0.95819	1.02215	0.712316	0.96161	0.988952	0.965858	1.08714	0.975253	0.963337	0.986323	0.961663	1.04782	0.993727	0.95819	1.07053	0.983697	1.00627	1.03636	0.942425	0.999099	0.9757	0.95819	1.03874	1.04599	1.01152
716	Sunil Krishnan-B (Pankaj Singh-B)	28_Sunil_Krishnan-B__Pankaj_Singh-B			nominal	Sunil_Krishnan-B__Pankaj_Singh-B_17	17_6B_Abeta 42 + Insulin	human cell line	0.995365	0.999159	0.883955	1.0028	0.961232	1.01833	0.929746	0.984672	0.949495	0.977576	1.66396	1.30345	1.03334	0.99748	0.870414	1.0099	1.02407	0.986026	0.854419	1.01861	1.0415	1.01618	0.961579	1.03543	0.981217	0.874932	0.999787	0.996745	1.1536	0.996842	0.93207	1.00943	1.00007	0.984881	1.0099	0.999893	0.819823	1.10925	1.00311	0.889989	1.06428
717	Sunil Krishnan-B (Pankaj Singh-B)	28_Sunil_Krishnan-B__Pankaj_Singh-B			nominal	Sunil_Krishnan-B__Pankaj_Singh-B_18	18_6C_Abeta 42 + Insulin	human cell line	0.95946	0.990141	0.929262	1.0118	1.04606	1.00391	0.886134	0.912874	0.987493	1.04606	1.77479	1.3007	1.04606	1.01882	0.828357	0.926932	0.951323	0.976459	0.95162	1.01379	1.00115	0.98427	0.988445	0.925375	0.845082	0.869275	1.02551	0.988845	1.02055	0.951544	0.978573	0.857408	1.04606	1.04136	1.02863	1.05782	0.802987	0.954369	1.01414	0.951949	1.01243
718	Sunil Krishnan-B (Pankaj Singh-B)	28_Sunil_Krishnan-B__Pankaj_Singh-B			nominal	Sunil_Krishnan-B__Pankaj_Singh-B_19	19_7A_Vehicle	human cell line	0.932926	1.1164	1.1791	0.931447	0.988337	0.917299	1.00798	1.02231	0.913231	1.24281	0.929269	0.916985	0.955191	1.02006	0.681122	1.04174	0.931043	1.26281	0.882261	0.927896	0.987162	1.09434	1.13003	0.982051	0.888698	1.00483	0.946858	1.06671	0.996953	1.19803	1.11089	0.94761	1.05063	1.03686	0.912752	0.972001	0.936263	0.900895	0.927146	1.13426	1.03787
719	Sunil Krishnan-B (Pankaj Singh-B)	28_Sunil_Krishnan-B__Pankaj_Singh-B			nominal	Sunil_Krishnan-B__Pankaj_Singh-B_20	20_7B_Vehicle	human cell line	0.96324	1.05365	1.13758	0.980453	1.01833	0.875984	1.06471	1.00801	1.04684	1.35016	0.905564	0.877127	1.03937	1.02357	0.641744	1.00011	0.936607	1.05107	1.1526	0.909632	1.07486	1.0408	0.982057	0.933796	0.927065	1.05094	1.01444	1.11746	1.02562	1.14655	1.11551	0.945271	1.04462	1.09395	0.848043	0.973911	1.01753	0.962345	0.939016	1.11951	1.01342
720	Sunil Krishnan-B (Pankaj Singh-B)	28_Sunil_Krishnan-B__Pankaj_Singh-B			nominal	Sunil_Krishnan-B__Pankaj_Singh-B_21	21_7C_Vehicle	human cell line	0.963007	1.04532	1.02747	0.997724	0.989458	0.972643	1.08776	0.977371	1.09283	1.44494	0.825201	0.867928	0.9287	1.02199	0.671543	1.01898	0.93719	1.05609	0.919213	0.912681	1.06383	1.05357	0.976161	0.901994	0.938979	1.00816	0.972432	1.09934	1.04612	1.12126	1.12659	0.955719	1.05852	1.1237	0.923255	0.99385	1.0097	1.02909	0.938677	1.13624	1.0014
[truncated: 267 more columns]

## Sheet: NormLog2
								Antibody Name	14-3-3-beta	14-3-3-zeta	4E-BP1	4E-BP1_pS65	53BP1	A-Raf	ACC1	ACC_pS79	ADAR1	Akt	Akt_pS473	Akt_pT308	AMPK-a2_pS345	AMPKa	AMPKa_pT172	Annexin-I	Annexin-VII	AR	ARID1A	Atg3	Atg7	ATM	ATM_pS1981	ATR_pS428	Aurora-B	Axl	b-Actin	b-Catenin	b-Catenin_pT41_S45	B-Raf	B-Raf_pS445	B7-H4	Bad_pS112	Bak	BAP1	Bax	Bcl-xL	Bcl2	Beclin	Bid	Bim
								Antibody Origin	R	R	R	R	R	R	R	R	M	R	R	R	R	R	R	M	M	R	R	R	R	R	R	R	R	R	R	R	R	R	R	R	R	R	M	R	R	M	R	R	R
								Gene Name	YWHAB	YWHAZ	EIF4EBP1	EIF4EBP1	TP53BP1	ARAF	ACACA/ ACACB	ACACA/ACACB	ADAR	AKT1/2/3	AKT1/2/3	AKT1/2/3	PRKAA2	PRKAA1/2	PRKAA1/2	ANXA1	ANXA7	AR	ARID1A	ATG3	ATG7	ATM	ATM	ATR	AURKB	AXL	ACTB	CTNNB1	CTNNB1	BRAF	BRAF	VTCN1	BAD	BAK1	BAP1	BAX	BCL2L1	BCL2	BECN1	BID	BCL2L11
								Validation Status	V	V	V	V	V	V	C	V	V	V	V	V	V	C	C	V	V	V	C	V	V	V	V	C	V	V	C	V	V	C	V	C	V	C	V	V	V	V	C	C	V
								Slide Id	GBL1144582	GBL1144583	GBL1144348	GBL1144349	GBL1144437	GBL1144487	GBL1144351	GBL1144350	GBL1144609	GBL1144660	GBL1144374	GBL1144474	GBL1144504	GBL1144352	GBL1144353	GBL1144612	GBL1144608	GBL1144565	GBL1144515	GBL1144523	GBL1144524	GBL1144506	GBL1144507	GBL1144546	GBL1144512	GBL1144497	GBL1144480	GBL1144357	GBL1144481	GBL1144559	GBL1144361	GBL1144541	GBL1144354	GBL1144355	GBL1144636	GBL1144356	GBL1144358	GBL1144624	GBL1144591	GBL1144359	GBL1144360
								Antibody Name in Heatmap	14-3-3-beta-R-V	14-3-3-zeta-R-V	4E-BP1-R-V	4E-BP1_pS65-R-V	53BP1-R-V	A-Raf-R-V	ACC1-R-C	ACC_pS79-R-V	ADAR1-M-V	Akt-R-V	Akt_pS473-R-V	Akt_pT308-R-V	AMPK-a2_pS345-R-V	AMPKa-R-C	AMPKa_pT172-R-C	Annexin-I-M-V	Annexin-VII-M-V	AR-R-V	ARID1A-R-C	Atg3-R-V	Atg7-R-V	ATM-R-V	ATM_pS1981-R-V	ATR_pS428-R-C	Aurora-B-R-V	Axl-R-V	b-Actin-R-C	b-Catenin-R-V	b-Catenin_pT41_S45-R-V	B-Raf-R-C	B-Raf_pS445-R-V	B7-H4-R-C	Bad_pS112-R-V	Bak-R-C	BAP1-M-V	Bax-R-V	Bcl-xL-R-V	Bcl2-M-V	Beclin-R-C	Bid-R-C	Bim-R-V
								Probabilities (QC Score)	0.928356	0.860142	0.951039	0.950514	0.952341	0.955901	0.955105	0.958116	0.916469	0.853838	0.95127	0.956545	0.862934	0.954887	0.967568	0.902441	0.92124	0.938634	0.966211	0.943151	0.966335	0.959059	0.884195	0.940566	0.933574	0.942243	0.875996	0.950027	0.933985	0.958581	0.958016	0.914757	0.935648	0.909787	0.918703	0.883895	0.917508	0.85358	0.889353	0.889503	0.887597
								Slide no.	1	2	3	4	5	6	7	8	9	10	11	12	13	14	15	16	17	18	19	20	21	22	23	24	25	26	27	28	29	30	31	32	33	34	35	36	37	38	39	40	41
Order	Sample Source	Category_1	Category_2	Category_3	Sample	Sample Name	Sample description	Sample Type	14-3-3-beta-R-V	14-3-3-zeta-R-V	4E-BP1-R-V	4E-BP1_pS65-R-V	53BP1-R-V	A-Raf-R-V	ACC1-R-C	ACC_pS79-R-V	ADAR1-M-V	Akt-R-V	Akt_pS473-R-V	Akt_pT308-R-V	AMPK-a2_pS345-R-V	AMPKa-R-C	AMPKa_pT172-R-C	Annexin-I-M-V	Annexin-VII-M-V	AR-R-V	ARID1A-R-C	Atg3-R-V	Atg7-R-V	ATM-R-V	ATM_pS1981-R-V	ATR_pS428-R-C	Aurora-B-R-V	Axl-R-V	b-Actin-R-C	b-Catenin-R-V	b-Catenin_pT41_S45-R-V	B-Raf-R-C	B-Raf_pS445-R-V	B7-H4-R-C	Bad_pS112-R-V	Bak-R-C	BAP1-M-V	Bax-R-V	Bcl-xL-R-V	Bcl2-M-V	Beclin-R-C	Bid-R-C	Bim-R-V
									NormLog2	NormLog2	NormLog2	NormLog2	NormLog2	NormLog2	NormLog2	NormLog2	NormLog2	NormLog2	NormLog2	NormLog2	NormLog2	NormLog2	NormLog2	NormLog2	NormLog2	NormLog2	NormLog2	NormLog2	NormLog2	NormLog2	NormLog2	NormLog2	NormLog2	NormLog2	NormLog2	NormLog2	NormLog2	NormLog2	NormLog2	NormLog2	NormLog2	NormLog2	NormLog2	NormLog2	NormLog2	NormLog2	NormLog2	NormLog2	NormLog2
645	Sunil Krishnan-B (Pankaj Singh-B)	28_Sunil_Krishnan-B__Pankaj_Singh-B			sample	Sunil_Krishnan-B__Pankaj_Singh-B_1	1_1A_untreated	human cell line	-0.00784837	0.00162665	-0.0363832	-0.0299974	0.0344098	0.00201744	-0.0572978	0.0893549	-0.118653	0.0597661	-1.07777	-0.6296	-0.173841	0.0125817	0.243472	0.0426684	0.0358432	0.0802564	-0.330348	0.152376	0.0376363	-0.0368314	0.176594	0.110102	0.152125	-0.0609473	-0.0381505	-0.129452	0.0817786	-0.0324412	-0.0989462	-0.152615	-0.192271	0.0549654	-0.061862	0.0451572	-0.0414917	0.142324	0.108196	0.000697703	-0.070767
646	Sunil Krishnan-B (Pankaj Singh-B)	28_Sunil_Krishnan-B__Pankaj_Singh-B			sample	Sunil_Krishnan-B__Pankaj_Singh-B_2	2_1B_untreated	human cell line	0.0171565	-0.0464408	-0.0391587	-0.00295752	0.0552647	-0.0370276	-0.0401876	0.157392	0.0025204	-0.0414535	-1.04369	-0.743514	0.0458678	-0.0387211	0.272011	0.0504827	-0.0744881	-0.0745545	-0.21336	0.0689525	0.0400408	-0.0611403	0.0918047	0.0324804	0.117439	0.0500413	0.00845404	-0.0144317	0.066589	-0.0631315	-0.0618995	-0.178174	-0.293495	0.0800062	-0.140132	0.0309727	0.0170664	-0.00186694	0.0920022	0.0281582	0.0452596
647	Sunil Krishnan-B (Pankaj Singh-B)	28_Sunil_Krishnan-B__Pankaj_Singh-B			sample	Sunil_Krishnan-B__Pankaj_Singh-B_3	3_1C_untreated	human cell line	0.000967923	-0.0721174	-0.111404	-0.00727319	0.0329214	-0.0164753	-0.0768508	0.213073	0.0303535	0.103246	-0.931857	-0.576303	-0.11686	-0.0084689	0.213073	0.0466166	0.00895559	0.0525101	0.0845396	0.11923	0.119713	-0.130697	0.150872	0.0704513	0.124178	-0.0361572	-0.0921957	-0.103457	0.0578871	-0.124384	-0.055568	-0.201123	-0.136713	0.11362	-0.223589	-0.00308697	0.0451206	0.0722201	0.103267	0.0571398	-0.0489781
648	Sunil Krishnan-B (Pankaj Singh-B)	28_Sunil_Krishnan-B__Pankaj_Singh-B			sample	Sunil_Krishnan-B__Pankaj_Singh-B_4	4_2A_Insulin (100 nM)	human cell line	-0.0230744	-0.0762015	0.0993953	0.0421153	-0.0184131	0.0245977	0.0392906	0.0649921	0.106867	0.546729	0.690381	0.240025	-0.117584	0.0180136	-0.0707495	0.0665698	-0.133464	-0.0145118	-0.0256114	-0.0764392	0.0356572	0.0107775	-0.095962	-0.0745953	-0.0488177	0.0138418	-0.0411828	0.0401064	0.0835886	0.0446018	0.121125	-0.139491	0.180776	0.164281	-0.0753613	-0.0596404	0.0855579	0.0987718	-0.139491	0.221898	0.0134255
667	Sunil Krishnan-B (Pankaj Singh-B)	28_Sunil_Krishnan-B__Pankaj_Singh-B			sample	Sunil_Krishnan-B__Pankaj_Singh-B_5	5_2B_Insulin (100 nM)	human cell line	-0.0385357	0.254289	0.128393	0.0720193	0.0514538	-0.0183521	0.0496965	-0.0289914	-0.0978088	0.0223868	0.705612	0.26522	-0.0123514	-0.00160244	-0.0167261	0.000796693	-0.0570738	-0.00188927	-0.0409496	-0.0403347	-0.0255421	-0.00835871	0.0655511	-0.0310215	0.00710682	0.0329118	-0.0798608	0.0366728	0.0787697	0.183142	0.0419523	0.0536525	0.143608	0.107801	0.0475483	-0.0366547	0.0846953	0.0375322	-0.0186592	0.228671	-0.0121132
668	Sunil Krishnan-B (Pankaj Singh-B)	28_Sunil_Krishnan-B__Pankaj_Singh-B			sample	Sunil_Krishnan-B__Pankaj_Singh-B_6	6_2C_Insulin (100 nM)	human cell line	-0.0197475	0.22006	0.0901472	-0.000909669	0.0566391	0.00513558	-0.0394907	0.0904049	-0.0913135	0.105503	0.609421	0.21708	-0.00652125	-0.0301121	-0.0252069	-0.0566793	-0.0417627	0.0912956	0.359004	-0.0448453	0.0175327	-0.0299698	0.0452212	-0.0108228	0.0901911	-0.0796307	-0.14539	-0.570037	0.0257583	0.347363	0.00729384	0.0242999	0.221427	0.176796	0.00798353	-0.114609	0.0580566	0.022821	-0.0757205	0.227441	-0.0542681
669	Sunil Krishnan-B (Pankaj Singh-B)	28_Sunil_Krishnan-B__Pankaj_Singh-B			sample	Sunil_Krishnan-B__Pankaj_Singh-B_7	7_3A_Abeta 40 (1hr)	human cell line	-0.0344519	0.111181	0.0667132	0.0226026	0.0526847	0.0093094	-0.0163916	-0.294514	-0.107115	0.0617685	-0.249362	-0.114687	-0.0753667	0.0153492	-0.343609	0.0779141	-0.065805	0.0584964	-0.227301	0.0949521	0.0330622	0.0191195	0.117451	0.0482597	0.0648822	0.014522	-0.0516449	-0.11719	0.0732444	0.133007	-0.0540472	-0.14852	-0.0324368	0.062512	-0.0351708	0.0401372	0.0740198	-0.0470941	-0.00197985	0.137214	-0.103169
670	Sunil Krishnan-B (Pankaj Singh-B)	28_Sunil_Krishnan-B__Pankaj_Singh-B			sample	Sunil_Krishnan-B__Pankaj_Singh-B_8	8_3B_Abeta 40 (1hr)	human cell line	0.0139638	-0.0468435	-0.0957248	-0.00697971	-0.00242303	-0.0183595	0.0557298	-0.374902	-0.0352139	0.0200668	-0.28774	-0.172497	0.0988823	-0.0370356	-0.529581	0.011498	-0.0154447	-0.032467	-0.511116	0.116146	0.0190834	0.0163266	0.0457591	0.0689063	0.0867069	-0.0957169	-0.0217897	-0.177858	0.115538	-0.113426	-0.0376505	-0.150164	-0.19846	0.0654141	-0.124192	0.0155628	-0.0404422	-0.0425457	0.0758143	0.0627716	-0.019951
671	Sunil Krishnan-B (Pankaj Singh-B)	28_Sunil_Krishnan-B__Pankaj_Singh-B			sample	Sunil_Krishnan-B__Pankaj_Singh-B_9	9_3C_Abeta 40 (1hr)	human cell line	0.078131	0.0161286	0.0285606	-0.00325727	-0.115095	-0.0462789	0.0697326	-0.117558	0.00885008	0.0699565	-0.340094	-0.313048	0.00079148	-0.0163183	-0.28904	0.00470939	-0.0263537	-0.00879422	0.0820942	0.055625	0.062644	-0.0572739	0.0616918	0.0541265	0.00961583	-0.0264184	-0.00926121	0.0352961	0.0522876	-0.070611	0.0443318	-0.135778	-0.112019	0.0764896	-0.162434	-0.00707233	0.0834566	0.0200408	0.0838149	0.0810539	-0.0598462
672	Sunil Krishnan-B (Pankaj Singh-B)	28_Sunil_Krishnan-B__Pankaj_Singh-B			sample	Sunil_Krishnan-B__Pankaj_Singh-B_10	10_4A_Abeta 40 + Insulin	human cell line	-0.115384	-0.143225	-0.12438	-0.00298764	0.0112301	0.00636064	0.0145485	0.267072	0.0993306	0.560352	0.115553	0.0852407	0.0955344	0.00426481	0.278867	0.0928964	0.00288305	0.0450745	-0.0646257	0.058244	0.0306036	0.0365594	0.043186	0.0046912	-0.00383588	0.0231815	-0.0868463	0.101198	-0.00517369	0.0722032	0.09864	-0.269795	-0.0101064	0.0526166	-0.291023	0.038253	-0.0561864	-0.156234	-0.354041	0.0047	0.0381765
691	Sunil Krishnan-B (Pankaj Singh-B)	28_Sunil_Krishnan-B__Pankaj_Singh-B			sample	Sunil_Krishnan-B__Pankaj_Singh-B_11	11_4B_Abeta 40 + Insulin	human cell line	0	0.145931	0	0.0593965	0.0919536	-0.0130547	0	0.339767	0.00275543	-0.0221949	0.0908966	0.0501296	-0.00938601	0	0.269676	0.0536965	-0.0173798	0.102219	0.0537077	0	-0.0481054	-0.0133219	-0.0849929	0	-0.00509686	-0.027665	0.0958648	0.081019	-0.01076	0.109317	0	0.0774895	-0.0229146	0	0.0528171	0.0125836	-0.0364667	-0.00296125	-0.225614	0.052319	-0.0567012
692	Sunil Krishnan-B (Pankaj Singh-B)	28_Sunil_Krishnan-B__Pankaj_Singh-B			sample	Sunil_Krishnan-B__Pankaj_Singh-B_12	12_4C_Abeta 40 + Insulin	human cell line	0.0349413	0.135454	-0.114138	0	-0.115365	-0.037397	-0.0704946	0.325007	-0.172737	-0.0890811	-0.0387137	0	0.107093	-0.0449012	0.30971	0.0146301	-0.0746599	0.116159	0.102908	-0.00520755	0.028276	0	0	0.0158854	0.0201938	0	-0.0571327	-0.236613	0	0.139025	-0.105322	-0.018732	0.0471434	-0.00596636	0.0171513	-0.0497826	-0.134355	0.0143967	-0.0620697	0	-0.0259079
693	Sunil Krishnan-B (Pankaj Singh-B)	28_Sunil_Krishnan-B__Pankaj_Singh-B			sample	Sunil_Krishnan-B__Pankaj_Singh-B_13	13_5A_Abeta 42 (1hr)	human cell line	0.0839701	0.00246498	0.0630496	0.0123719	-0.0313076	0.0327171	0.146447	-0.131009	-0.0107727	-0.0162875	-0.87047	-0.481232	-0.0508456	0.0533715	0.0914674	-0.311615	-0.00917147	-0.0178548	0.0248208	-0.0161023	-0.0296453	-0.0448077	0.0537711	-0.0143109	0.00819937	0.00461669	-0.00575262	-0.0107727	-0.02463	0.175127	0.00796785	-0.000174983	0.00654148	0.0187695	0.123477	-0.0107727	-0.0107727	-0.0423839	0.0776806	-0.0793348	-0.0107727
694	Sunil Krishnan-B (Pankaj Singh-B)	28_Sunil_Krishnan-B__Pankaj_Singh-B			sample	Sunil_Krishnan-B__Pankaj_Singh-B_14	14_5B_Abeta 42 (1hr)	human cell line	-0.0893979	0.0137575	-0.00440783	-0.0519809	-0.0190722	0.0296412	0.108789	-0.0240632	-0.0420034	0.026421	-0.934002	-0.495098	-0.0661899	0.0041656	0.169015	-0.140963	-0.0137464	0.036887	-0.299195	0.033531	-0.0204445	0.0241232	-0.0119781	-0.042143	-0.0204445	0.0305494	0.061486	0.0891194	0.0393205	-0.0819564	0.0743902	0.00478111	-0.0880847	0.0519246	-0.00534654	-0.0209972	0.0382825	-0.0113367	0.0834018	0.116005	0.0523281
695	Sunil Krishnan-B (Pankaj Singh-B)	28_Sunil_Krishnan-B__Pankaj_Singh-B			sample	Sunil_Krishnan-B__Pankaj_Singh-B_15	15_5C_Abeta 42 (1hr)	human cell line	0.0491396	-0.062436	-0.02632	-0.00480417	-0.0591268	-0.0593932	0.100417	0.0993768	0.0410408	0.0919035	-0.937595	-0.493398	0.0138723	0.0232162	0.109896	-0.0257649	-0.0241897	-0.0593932	-0.0147742	-0.0243809	0.0760399	0.0549576	0.0085243	-0.0371624	-0.0455944	0.108407	0.0428249	0.109917	0.125682	-0.0241536	0.0729553	-0.0562089	0.00382359	0.204703	-0.0644985	-0.0488444	0.122046	0.00351621	0.0667521	0.0039985	-0.0511627
696	Sunil Krishnan-B (Pankaj Singh-B)	28_Sunil_Krishnan-B__Pankaj_Singh-B			sample	Sunil_Krishnan-B__Pankaj_Singh-B_16	16_6A_Abeta 42 + Insulin	human cell line	-0.022046	-0.0616164	-0.0503318	-0.0271557	0.0119983	0.0403529	0.0349517	-0.090057	0.0976434	0.57809	0.781102	0.336574	0.0534371	0.00309205	-0.230642	0.038611	-0.0616164	0.03161	-0.48941	-0.0564762	-0.0160281	-0.050117	0.120538	-0.0361513	-0.0538879	-0.0198675	-0.056397	0.0673889	-0.0090788	-0.0616164	0.0983285	-0.0237141	0.00901868	0.0515267	-0.0855508	-0.00130093	-0.0354899	-0.0616164	0.054828	0.0648651	0.0165249
716	Sunil Krishnan-B (Pankaj Singh-B)	28_Sunil_Krishnan-B__Pankaj_Singh-B			sample	Sunil_Krishnan-B__Pankaj_Singh-B_17	17_6B_Abeta 42 + Insulin	human cell line	-0.00670192	-0.00121441	-0.177955	0.00403263	-0.0570441	0.0262032	-0.105092	-0.0222853	-0.0747675	-0.0327193	0.734623	0.38233	0.0473158	-0.00364024	-0.200227	0.0142191	0.034315	-0.0203029	-0.226984	0.0266018	0.0586683	0.0231495	-0.0565227	0.0502308	-0.0273555	-0.192756	-0.000307052	-0.00470377	0.206144	-0.00456365	-0.101489	0.0135475	9.84427e-05	-0.0219783	0.0142191	-0.000154392	-0.286615	0.149587	0.00448486	-0.168141	0.0898716
717	Sunil Krishnan-B (Pankaj Singh-B)	28_Sunil_Krishnan-B__Pankaj_Singh-B			sample	Sunil_Krishnan-B__Pankaj_Singh-B_18	18_6C_Abeta 42 + Insulin	human cell line	-0.0597054	-0.0142938	-0.105843	0.0169308	0.0649722	0.0056335	-0.174402	-0.131512	-0.0181575	0.0649722	0.827651	0.379284	0.0649722	0.0268995	-0.271675	-0.109465	-0.0719922	-0.0343686	-0.0715431	0.019764	0.00166108	-0.0228746	-0.0167673	-0.11189	-0.242837	-0.202115	0.0363379	-0.0161832	0.0293428	-0.0716583	-0.0312492	-0.221946	0.0649722	0.0584661	0.0407199	0.0810989	-0.316552	-0.0673814	0.0202633	-0.0710437	0.0178185
718	Sunil Krishnan-B (Pankaj Singh-B)	28_Sunil_Krishnan-B__Pankaj_Singh-B			sample	Sunil_Krishnan-B__Pankaj_Singh-B_19	19_7A_Vehicle	human cell line	-0.100166	0.158858	0.237685	-0.102454	-0.0169252	-0.124537	0.0114629	0.0318378	-0.130949	0.313608	-0.105832	-0.12503	-0.0661391	0.028661	-0.554014	0.0589993	-0.10308	0.336642	-0.180723	-0.107966	-0.0186405	0.130067	0.176364	-0.0261298	-0.170236	0.00694541	-0.0787805	0.093172	-0.00440194	0.260659	0.15171	-0.0776348	0.0712545	0.0522244	-0.131706	-0.0409705	-0.095014	-0.15057	-0.109131	0.18175	0.0536248
719	Sunil Krishnan-B (Pankaj Singh-B)	28_Sunil_Krishnan-B__Pankaj_Singh-B			sample	Sunil_Krishnan-B__Pankaj_Singh-B_20	20_7B_Vehicle	human cell line	-0.0540325	0.0753997	0.185973	-0.0284801	0.026204	-0.191023	0.0904645	0.011503	0.0660458	0.433133	-0.143112	-0.189142	0.0557127	0.0336083	-0.639929	0.000159145	-0.094484	0.0718619	0.204892	-0.136645	0.104145	0.0576984	-0.0261216	-0.09882	-0.109257	0.0716737	0.0206896	0.160223	0.0364952	0.1973	0.15771	-0.0812004	0.062985	0.129548	-0.237791	-0.0381385	0.0250776	-0.0553746	-0.0907777	0.162872	0.0192287
720	Sunil Krishnan-B (Pankaj Singh-B)	28_Sunil_Krishnan-B__Pankaj_Singh-B			sample	Sunil_Krishnan-B__Pankaj_Singh-B_21	21_7C_Vehicle	human cell line	-0.0543823	0.0639508	0.0390906	-0.00328803	-0.0152903	-0.0400171	0.121366	-0.033022	0.128074	0.531011	-0.277183	-0.204353	-0.106715	0.0313803	-0.574449	0.0271224	-0.0935867	0.0787349	-0.121529	-0.131818	0.0892712	0.0752864	-0.0348085	-0.14881	-0.090836	0.0117181	-0.0403301	0.136638	0.0650513	0.165122	0.171968	-0.0653414	0.0820539	0.168253	-0.115199	-0.00889998	0.0139245	0.0413664	-0.0912998	0.184273	0.00201415
[truncated: 265 more columns]

## Sheet: NormLog2_MedianCentered
								Antibody Name	14-3-3-beta	14-3-3-zeta	4E-BP1	4E-BP1_pS65	53BP1	A-Raf	ACC1	ACC_pS79	ADAR1	Akt	Akt_pS473	Akt_pT308	AMPK-a2_pS345	AMPKa	AMPKa_pT172	Annexin-I	Annexin-VII	AR	ARID1A	Atg3	Atg7	ATM	ATM_pS1981	ATR_pS428	Aurora-B	Axl	b-Actin	b-Catenin	b-Catenin_pT41_S45	B-Raf	B-Raf_pS445	B7-H4	Bad_pS112	Bak	BAP1	Bax	Bcl-xL	Bcl2	Beclin	Bid	Bim
								Antibody Origin	R	R	R	R	R	R	R	R	M	R	R	R	R	R	R	M	M	R	R	R	R	R	R	R	R	R	R	R	R	R	R	R	R	R	M	R	R	M	R	R	R
								Gene Name	YWHAB	YWHAZ	EIF4EBP1	EIF4EBP1	TP53BP1	ARAF	ACACA/ ACACB	ACACA/ACACB	ADAR	AKT1/2/3	AKT1/2/3	AKT1/2/3	PRKAA2	PRKAA1/2	PRKAA1/2	ANXA1	ANXA7	AR	ARID1A	ATG3	ATG7	ATM	ATM	ATR	AURKB	AXL	ACTB	CTNNB1	CTNNB1	BRAF	BRAF	VTCN1	BAD	BAK1	BAP1	BAX	BCL2L1	BCL2	BECN1	BID	BCL2L11
								Validation Status	V	V	V	V	V	V	C	V	V	V	V	V	V	C	C	V	V	V	C	V	V	V	V	C	V	V	C	V	V	C	V	C	V	C	V	V	V	V	C	C	V
								Slide Id	GBL1144582	GBL1144583	GBL1144348	GBL1144349	GBL1144437	GBL1144487	GBL1144351	GBL1144350	GBL1144609	GBL1144660	GBL1144374	GBL1144474	GBL1144504	GBL1144352	GBL1144353	GBL1144612	GBL1144608	GBL1144565	GBL1144515	GBL1144523	GBL1144524	GBL1144506	GBL1144507	GBL1144546	GBL1144512	GBL1144497	GBL1144480	GBL1144357	GBL1144481	GBL1144559	GBL1144361	GBL1144541	GBL1144354	GBL1144355	GBL1144636	GBL1144356	GBL1144358	GBL1144624	GBL1144591	GBL1144359	GBL1144360
								Antibody Name in Heatmap	14-3-3-beta-R-V	14-3-3-zeta-R-V	4E-BP1-R-V	4E-BP1_pS65-R-V	53BP1-R-V	A-Raf-R-V	ACC1-R-C	ACC_pS79-R-V	ADAR1-M-V	Akt-R-V	Akt_pS473-R-V	Akt_pT308-R-V	AMPK-a2_pS345-R-V	AMPKa-R-C	AMPKa_pT172-R-C	Annexin-I-M-V	Annexin-VII-M-V	AR-R-V	ARID1A-R-C	Atg3-R-V	Atg7-R-V	ATM-R-V	ATM_pS1981-R-V	ATR_pS428-R-C	Aurora-B-R-V	Axl-R-V	b-Actin-R-C	b-Catenin-R-V	b-Catenin_pT41_S45-R-V	B-Raf-R-C	B-Raf_pS445-R-V	B7-H4-R-C	Bad_pS112-R-V	Bak-R-C	BAP1-M-V	Bax-R-V	Bcl-xL-R-V	Bcl2-M-V	Beclin-R-C	Bid-R-C	Bim-R-V
								Probabilities (QC Score)	0.928356	0.860142	0.951039	0.950514	0.952341	0.955901	0.955105	0.958116	0.916469	0.853838	0.95127	0.956545	0.862934	0.954887	0.967568	0.902441	0.92124	0.938634	0.966211	0.943151	0.966335	0.959059	0.884195	0.940566	0.933574	0.942243	0.875996	0.950027	0.933985	0.958581	0.958016	0.914757	0.935648	0.909787	0.918703	0.883895	0.917508	0.85358	0.889353	0.889503	0.887597
								Slide no.	1	2	3	4	5	6	7	8	9	10	11	12	13	14	15	16	17	18	19	20	21	22	23	24	25	26	27	28	29	30	31	32	33	34	35	36	37	38	39	40	41
Order	Sample Source	Category_1	Category_2	Category_3	Sample	Sample Name	Sample description	Sample Type	14-3-3-beta-R-V	14-3-3-zeta-R-V	4E-BP1-R-V	4E-BP1_pS65-R-V	53BP1-R-V	A-Raf-R-V	ACC1-R-C	ACC_pS79-R-V	ADAR1-M-V	Akt-R-V	Akt_pS473-R-V	Akt_pT308-R-V	AMPK-a2_pS345-R-V	AMPKa-R-C	AMPKa_pT172-R-C	Annexin-I-M-V	Annexin-VII-M-V	AR-R-V	ARID1A-R-C	Atg3-R-V	Atg7-R-V	ATM-R-V	ATM_pS1981-R-V	ATR_pS428-R-C	Aurora-B-R-V	Axl-R-V	b-Actin-R-C	b-Catenin-R-V	b-Catenin_pT41_S45-R-V	B-Raf-R-C	B-Raf_pS445-R-V	B7-H4-R-C	Bad_pS112-R-V	Bak-R-C	BAP1-M-V	Bax-R-V	Bcl-xL-R-V	Bcl2-M-V	Beclin-R-C	Bid-R-C	Bim-R-V
									Median-Centered	Median-Centered	Median-Centered	Median-Centered	Median-Centered	Median-Centered	Median-Centered	Median-Centered	Median-Centered	Median-Centered	Median-Centered	Median-Centered	Median-Centered	Median-Centered	Median-Centered	Median-Centered	Median-Centered	Median-Centered	Median-Centered	Median-Centered	Median-Centered	Median-Centered	Median-Centered	Median-Centered	Median-Centered	Median-Centered	Median-Centered	Median-Centered	Median-Centered	Median-Centered	Median-Centered	Median-Centered	Median-Centered	Median-Centered	Median-Centered	Median-Centered	Median-Centered	Median-Centered	Median-Centered	Median-Centered	Median-Centered
645	Sunil Krishnan-B (Pankaj Singh-B)	28_Sunil_Krishnan-B__Pankaj_Singh-B			sample	Sunil_Krishnan-B__Pankaj_Singh-B_1	1_1A_untreated	human cell line	0.0118991	-0.000838337	-0.0319754	-0.0270097	0.0231796	0.0150722	-0.0718464	0.0778519	-0.10788	-0.0052061	-0.934662	-0.504569	-0.16732	0.00841612	0.268679	0.0280383	0.0776059	0.0433694	-0.265722	0.152376	0.00703267	-0.0368314	0.131373	0.120925	0.155961	-0.065564	0	-0.164748	0.029491	-0.077043	-0.106914	-0.0749803	-0.196095	-0.0075466	0.00263656	0.0522295	-0.0554162	0.14419	0.103711	-0.0620739	-0.0599943
646	Sunil Krishnan-B (Pankaj Singh-B)	28_Sunil_Krishnan-B__Pankaj_Singh-B			sample	Sunil_Krishnan-B__Pankaj_Singh-B_2	2_1B_untreated	human cell line	0.036904	-0.0489058	-0.0347509	3.01238e-05	0.0440346	-0.0239729	-0.0547362	0.145889	0.0132931	-0.106426	-0.900579	-0.618483	0.0523891	-0.0428867	0.297217	0.0358526	-0.0327254	-0.111442	-0.148734	0.0689525	0.00943719	-0.0611403	0.0465834	0.0433033	0.121275	0.0454246	0.0466045	-0.0497278	0.0143014	-0.107733	-0.0698674	-0.100539	-0.297318	0.0174942	-0.0756333	0.038045	0.00314193	0	0.0875174	-0.0346134	0.0560323
647	Sunil Krishnan-B (Pankaj Singh-B)	28_Sunil_Krishnan-B__Pankaj_Singh-B			sample	Sunil_Krishnan-B__Pankaj_Singh-B_3	3_1C_untreated	human cell line	0.0207154	-0.0745824	-0.106997	-0.00428555	0.0216913	-0.00342059	-0.0913993	0.20157	0.0411262	0.038274	-0.788745	-0.451272	-0.110338	-0.0126345	0.23828	0.0319865	0.0507183	0.0156231	0.149165	0.11923	0.0891096	-0.130697	0.10565	0.0812741	0.128014	-0.0407738	-0.0540453	-0.138753	0.00559949	-0.168986	-0.0635359	-0.123488	-0.140537	0.0511082	-0.15909	0.00398536	0.0311961	0.0740871	0.0987817	-0.00563185	-0.0382054
648	Sunil Krishnan-B (Pankaj Singh-B)	28_Sunil_Krishnan-B__Pankaj_Singh-B			sample	Sunil_Krishnan-B__Pankaj_Singh-B_4	4_2A_Insulin (100 nM)	human cell line	-0.00332694	-0.0786665	0.103803	0.045103	-0.0296432	0.0376524	0.0247421	0.053489	0.117639	0.481757	0.833493	0.365055	-0.111063	0.013848	-0.0455426	0.0519397	-0.0917013	-0.0513988	0.0390143	-0.0764392	0.00505355	0.0107775	-0.141183	-0.0637725	-0.0449818	0.00922511	-0.00303235	0.00481025	0.0313009	0	0.113157	-0.0618562	0.176952	0.101769	-0.0108628	-0.0525681	0.0716334	0.100639	-0.143976	0.159126	0.0241982
667	Sunil Krishnan-B (Pankaj Singh-B)	28_Sunil_Krishnan-B__Pankaj_Singh-B			sample	Sunil_Krishnan-B__Pankaj_Singh-B_5	5_2B_Insulin (100 nM)	human cell line	-0.0187882	0.251824	0.132801	0.075007	0.0402236	-0.00529736	0.035148	-0.0404944	-0.087036	-0.0425854	0.848724	0.39025	-0.00583015	-0.00576804	0.0084808	-0.0138334	-0.0153111	-0.0387763	0.0236762	-0.0403347	-0.0561457	-0.00835871	0.0203298	-0.0201987	0.0109427	0.0282951	-0.0417103	0.00137664	0.0264821	0.13854	0.0339845	0.131287	0.139784	0.0452891	0.112047	-0.0295824	0.0707708	0.0393992	-0.023144	0.1659	-0.00134053
668	Sunil Krishnan-B (Pankaj Singh-B)	28_Sunil_Krishnan-B__Pankaj_Singh-B			sample	Sunil_Krishnan-B__Pankaj_Singh-B_6	6_2C_Insulin (100 nM)	human cell line	0	0.217595	0.094555	0.00207797	0.045409	0.0181903	-0.0540392	0.0789018	-0.0805408	0.0405305	0.752533	0.34211	0	-0.0342777	0	-0.0713094	0	0.0544086	0.42363	-0.0448453	-0.0130709	-0.0299698	0	0	0.094027	-0.0842474	-0.10724	-0.605333	-0.0265293	0.302761	-0.000674009	0.101935	0.217603	0.114284	0.0724821	-0.107537	0.0441321	0.0246879	-0.0802053	0.164669	-0.0434954
669	Sunil Krishnan-B (Pankaj Singh-B)	28_Sunil_Krishnan-B__Pankaj_Singh-B			sample	Sunil_Krishnan-B__Pankaj_Singh-B_7	7_3A_Abeta 40 (1hr)	human cell line	-0.0147044	0.108716	0.0711211	0.0255902	0.0414546	0.0223641	-0.0309402	-0.306017	-0.0963423	-0.00320371	-0.10625	0.0103438	-0.0688454	0.0111835	-0.318402	0.063284	-0.0240424	0.0216094	-0.162676	0.0949521	0.0024586	0.0191195	0.0722302	0.0590825	0.0687181	0.00990531	-0.0134944	-0.152486	0.0209568	0.0884056	-0.062015	-0.0708855	-0.0362604	0	0.0293278	0.0472095	0.0600953	-0.0452272	-0.00646471	0.0744425	-0.0923964
670	Sunil Krishnan-B (Pankaj Singh-B)	28_Sunil_Krishnan-B__Pankaj_Singh-B			sample	Sunil_Krishnan-B__Pankaj_Singh-B_8	8_3B_Abeta 40 (1hr)	human cell line	0.0337113	-0.0493085	-0.091317	-0.00399207	-0.0136531	-0.00530477	0.0411813	-0.386405	-0.0244412	-0.0449054	-0.144627	-0.0474671	0.105404	-0.0412012	-0.504374	-0.00313211	0.0263179	-0.0693539	-0.44649	0.116146	-0.0115202	0.0163266	0.000537844	0.0797291	0.0905428	-0.100334	0.0163608	-0.213155	0.0632508	-0.158028	-0.0456184	-0.0725292	-0.202283	0.00290206	-0.0596932	0.0226351	-0.0543667	-0.0406787	0.0713294	0	-0.00917832
671	Sunil Krishnan-B (Pankaj Singh-B)	28_Sunil_Krishnan-B__Pankaj_Singh-B			sample	Sunil_Krishnan-B__Pankaj_Singh-B_9	9_3C_Abeta 40 (1hr)	human cell line	0.0978786	0.0136637	0.0329684	-0.000269633	-0.126325	-0.0332242	0.055184	-0.129062	0.0196228	0.00498428	-0.196982	-0.188018	0.00731273	-0.0204839	-0.263833	-0.00992072	0.015409	-0.0456812	0.14672	0.055625	0.0320404	-0.0572739	0.0164706	0.0649493	0.0134517	-0.0310351	0.0288893	0	0	-0.115213	0.036364	-0.0581429	-0.115842	0.0139776	-0.0979358	0	0.0695321	0.0219077	0.07933	0.0182822	-0.0490735
672	Sunil Krishnan-B (Pankaj Singh-B)	28_Sunil_Krishnan-B__Pankaj_Singh-B			sample	Sunil_Krishnan-B__Pankaj_Singh-B_10	10_4A_Abeta 40 + Insulin	human cell line	-0.0956366	-0.14569	-0.119972	0	0	0.0194154	0	0.255568	0.110103	0.49538	0.258665	0.210271	0.102056	9.92024e-05	0.304074	0.0782662	0.0446457	0.00818749	0	0.058244	0	0.0365594	-0.00203521	0.015514	0	0.0185648	-0.0486958	0.0659022	-0.0574613	0.0276014	0.0906721	-0.19216	-0.01393	-0.00989546	-0.226525	0.0453253	-0.0701109	-0.154367	-0.358526	-0.0580716	0.0489492
691	Sunil Krishnan-B (Pankaj Singh-B)	28_Sunil_Krishnan-B__Pankaj_Singh-B			sample	Sunil_Krishnan-B__Pankaj_Singh-B_11	11_4B_Abeta 40 + Insulin	human cell line	0.0197475	0.143466	0.00440783	0.0623842	0.0807235	0	-0.0145485	0.328264	0.0135281	-0.0871671	0.234009	0.17516	-0.00286476	-0.0041656	0.294883	0.0390663	0.0243829	0.065332	0.118333	0	-0.078709	-0.0133219	-0.130214	0.0108228	-0.00126098	-0.0322817	0.134015	0.0457229	-0.0630476	0.064715	-0.00796785	0.155124	-0.0267382	-0.062512	0.117316	0.0196559	-0.0503912	-0.00109431	-0.230099	-0.0104527	-0.0459285
692	Sunil Krishnan-B (Pankaj Singh-B)	28_Sunil_Krishnan-B__Pankaj_Singh-B			sample	Sunil_Krishnan-B__Pankaj_Singh-B_12	12_4C_Abeta 40 + Insulin	human cell line	0.0546888	0.132989	-0.10973	0.00298764	-0.126595	-0.0243423	-0.0850431	0.313504	-0.161964	-0.154053	0.104398	0.12503	0.113614	-0.0490668	0.334917	0	-0.0328972	0.079272	0.167534	-0.00520755	-0.0023276	0	-0.0452212	0.0267082	0.0240297	-0.00461669	-0.0189822	-0.271909	-0.0522876	0.0944236	-0.11329	0.0589028	0.0433198	-0.0684784	0.0816498	-0.0427102	-0.14828	0.0162637	-0.0665545	-0.0627716	-0.0151352
693	Sunil Krishnan-B (Pankaj Singh-B)	28_Sunil_Krishnan-B__Pankaj_Singh-B			sample	Sunil_Krishnan-B__Pankaj_Singh-B_13	13_5A_Abeta 42 (1hr)	human cell line	0.103718	0	0.0674574	0.0153595	-0.0425377	0.0457718	0.131899	-0.142512	0	-0.0812597	-0.727358	-0.356201	-0.0443244	0.0492059	0.116674	-0.326246	0.0325912	-0.0547418	0.0894465	-0.0161023	-0.060249	-0.0448077	0.00854983	-0.00348813	0.0120352	0	0.0323978	-0.0460688	-0.0769176	0.130525	0	0.0774598	0.00271789	-0.0437425	0.187976	-0.00370038	-0.0246972	-0.0405169	0.0731958	-0.142106	0
694	Sunil Krishnan-B (Pankaj Singh-B)	28_Sunil_Krishnan-B__Pankaj_Singh-B			sample	Sunil_Krishnan-B__Pankaj_Singh-B_14	14_5B_Abeta 42 (1hr)	human cell line	-0.0696504	0.0112925	0	-0.0489933	-0.0303024	0.0426959	0.0942402	-0.0355663	-0.0312307	-0.0385512	-0.79089	-0.370067	-0.0596687	0	0.194221	-0.155593	0.0280162	0	-0.234569	0.033531	-0.0510481	0.0241232	-0.0571993	-0.0313201	-0.0166086	0.0259327	0.0996365	0.0538232	-0.0129671	-0.126558	0.0664223	0.0824159	-0.0919083	-0.0105874	0.059152	-0.0139249	0.024358	-0.00946977	0.078917	0.0532336	0.0631008
695	Sunil Krishnan-B (Pankaj Singh-B)	28_Sunil_Krishnan-B__Pankaj_Singh-B			sample	Sunil_Krishnan-B__Pankaj_Singh-B_15	15_5C_Abeta 42 (1hr)	human cell line	0.0688871	-0.064901	-0.0219122	-0.00181653	-0.0703569	-0.0463385	0.085868	0.0878737	0.0518135	0.0269313	-0.794483	-0.368367	0.0203935	0.0190506	0.135102	-0.040395	0.0175729	-0.0962802	0.0498516	-0.0243809	0.0454362	0.0549576	-0.0366969	-0.0263396	-0.0417585	0.10379	0.0809754	0.074621	0.0733947	-0.0687554	0.0649874	0.021426	0	0.142191	0	-0.041772	0.108122	0.00538315	0.0622673	-0.0587731	-0.04039
696	Sunil Krishnan-B (Pankaj Singh-B)	28_Sunil_Krishnan-B__Pankaj_Singh-B			sample	Sunil_Krishnan-B__Pankaj_Singh-B_16	16_6A_Abeta 42 + Insulin	human cell line	-0.00229849	-0.0640814	-0.045924	-0.0241681	0.000768233	0.0534077	0.0204032	-0.10156	0.108416	0.513118	0.924214	0.461604	0.0599584	-0.00107355	-0.205435	0.0239809	-0.0198537	-0.00527703	-0.424784	-0.0564762	-0.0466317	-0.050117	0.0753169	-0.0253285	-0.050052	-0.0244842	-0.0182466	0.0320928	-0.0613664	-0.106218	0.0903606	0.0539207	0.0051951	-0.0109854	-0.0210523	0.0057714	-0.0494144	-0.0597494	0.0503432	0.00209347	0.0272976
716	Sunil Krishnan-B (Pankaj Singh-B)	28_Sunil_Krishnan-B__Pankaj_Singh-B			sample	Sunil_Krishnan-B__Pankaj_Singh-B_17	17_6B_Abeta 42 + Insulin	human cell line	0.0130456	-0.00367939	-0.173548	0.00702027	-0.0682742	0.039258	-0.11964	-0.0337884	-0.0639948	-0.0976915	0.877735	0.507361	0.053837	-0.00780585	-0.17502	-0.000410975	0.0760777	-0.0571899	-0.162358	0.0266018	0.0280647	0.0231495	-0.101744	0.0610536	-0.0235196	-0.197373	0.0378434	-0.0399999	0.153856	-0.0491655	-0.109457	0.0911823	-0.00372514	-0.0844903	0.0787177	0.00691794	-0.30054	0.151453	0	-0.230913	0.100644
717	Sunil Krishnan-B (Pankaj Singh-B)	28_Sunil_Krishnan-B__Pankaj_Singh-B			sample	Sunil_Krishnan-B__Pankaj_Singh-B_18	18_6C_Abeta 42 + Insulin	human cell line	-0.0399579	-0.0167587	-0.101435	0.0199185	0.0537421	0.0186882	-0.188951	-0.143016	-0.00738475	0	0.970764	0.504314	0.0714935	0.0227339	-0.246469	-0.124095	-0.0302296	-0.0712556	-0.00691735	0.019764	-0.0289426	-0.0228746	-0.0619885	-0.101067	-0.239001	-0.206732	0.0744884	-0.0514793	-0.0229448	-0.11626	-0.0392171	-0.144312	0.0611486	-0.00404598	0.105218	0.0881712	-0.330476	-0.0655145	0.0157784	-0.133815	0.0285913
718	Sunil Krishnan-B (Pankaj Singh-B)	28_Sunil_Krishnan-B__Pankaj_Singh-B			sample	Sunil_Krishnan-B__Pankaj_Singh-B_19	19_7A_Vehicle	human cell line	-0.0804184	0.156393	0.242093	-0.0994665	-0.0281554	-0.111482	-0.00308561	0.0203348	-0.120176	0.248636	0.0372799	0	-0.0596179	0.0244954	-0.528807	0.0443691	-0.0613176	0.299755	-0.116097	-0.107966	-0.0492441	0.130067	0.131143	-0.015307	-0.1664	0.00232872	-0.0406301	0.0578759	-0.0566896	0.216057	0.143742	0	0.0674309	-0.0102876	-0.067207	-0.0338981	-0.108938	-0.148703	-0.113616	0.118979	0.0643975
719	Sunil Krishnan-B (Pankaj Singh-B)	28_Sunil_Krishnan-B__Pankaj_Singh-B			sample	Sunil_Krishnan-B__Pankaj_Singh-B_20	20_7B_Vehicle	human cell line	-0.034285	0.0729347	0.19038	-0.0254925	0.0149739	-0.177968	0.0759159	0	0.0768185	0.368161	0	-0.0641113	0.0622339	0.0294427	-0.614722	-0.014471	-0.0527213	0.0349749	0.269518	-0.136645	0.0735416	0.0576984	-0.0713428	-0.0879972	-0.105421	0.0670571	0.0588401	0.124927	-0.0157924	0.152698	0.149742	-0.00356552	0.0591614	0.0670363	-0.173292	-0.0310662	0.0111531	-0.0535076	-0.0952626	0.1001	0.0300014
720	Sunil Krishnan-B (Pankaj Singh-B)	28_Sunil_Krishnan-B__Pankaj_Singh-B			sample	Sunil_Krishnan-B__Pankaj_Singh-B_21	21_7C_Vehicle	human cell line	-0.0346348	0.0614858	0.0434985	-0.000300387	-0.0265204	-0.0269624	0.106817	-0.0445251	0.138847	0.466039	-0.134071	-0.0793226	-0.100194	0.0272147	-0.549242	0.0124923	-0.051824	0.0418479	-0.0569032	-0.131818	0.0586676	0.0752864	-0.0800298	-0.137987	-0.0870001	0.00710142	-0.00217961	0.101342	0.0127637	0.12052	0.164	0.0122934	0.0782303	0.105741	-0.0507003	-0.00182765	0	0.0432333	-0.0957846	0.121502	0.0127869
[truncated: 265 more columns]
