# Supplementary material for: Acute amyloid-β exposure disrupts insulin signaling in blood–brain barrier endothelial cell culture models
Source: Research Square preprint supplement (doi:10.21203/rs.3.rs-8436616/v1), 2026-01-12
Supplement: Supplementary file 3 [file c5c34b19adf66cc3eeff496f.xlsx]

## Sheet: RawLog2
								Antibody Name	14-3-3-beta	14-3-3-zeta	4E-BP1	4E-BP1_pS65	53BP1	A-Raf	ACC1	ACC_pS79	ADAR1	Akt	Akt_pS473	Akt_pT308	AMPK-a2_pS345	AMPKa	AMPKa_pT172	Annexin-I	Annexin-VII	AR	ARID1A	Atg3	Atg7	ATM	ATM_pS1981	ATR_pS428	Aurora-B	Axl	b-Actin	b-Catenin	b-Catenin_pT41_S45	B-Raf	B-Raf_pS445	B7-H4	Bad_pS112	Bak	BAP1	Bax	Bcl-xL	Bcl2	Beclin	Bid	Bim
								Antibody Origin	R	R	R	R	R	R	R	R	M	R	R	R	R	R	R	M	M	R	R	R	R	R	R	R	R	R	R	R	R	R	R	R	R	R	M	R	R	M	R	R	R
								Gene Name	YWHAB	YWHAZ	EIF4EBP1	EIF4EBP1	TP53BP1	ARAF	ACACA/ ACACB	ACACA/ACACB	ADAR	AKT1/2/3	AKT1/2/3	AKT1/2/3	PRKAA2	PRKAA1/2	PRKAA1/2	ANXA1	ANXA7	AR	ARID1A	ATG3	ATG7	ATM	ATM	ATR	AURKB	AXL	ACTB	CTNNB1	CTNNB1	BRAF	BRAF	VTCN1	BAD	BAK1	BAP1	BAX	BCL2L1	BCL2	BECN1	BID	BCL2L11
								Validation Status	V	V	V	V	V	V	C	V	V	V	V	V	V	C	C	V	V	V	C	V	V	V	V	C	V	V	C	V	V	C	V	C	V	C	V	V	V	V	C	C	V
								Slide Id	GBL1144582	GBL1144583	GBL1144348	GBL1144349	GBL1144437	GBL1144487	GBL1144351	GBL1144350	GBL1144609	GBL1144660	GBL1144374	GBL1144474	GBL1144504	GBL1144352	GBL1144353	GBL1144612	GBL1144608	GBL1144565	GBL1144515	GBL1144523	GBL1144524	GBL1144506	GBL1144507	GBL1144546	GBL1144512	GBL1144497	GBL1144480	GBL1144357	GBL1144481	GBL1144559	GBL1144361	GBL1144541	GBL1144354	GBL1144355	GBL1144636	GBL1144356	GBL1144358	GBL1144624	GBL1144591	GBL1144359	GBL1144360
								Antibody Name in Heatmap	14-3-3-beta-R-V	14-3-3-zeta-R-V	4E-BP1-R-V	4E-BP1_pS65-R-V	53BP1-R-V	A-Raf-R-V	ACC1-R-C	ACC_pS79-R-V	ADAR1-M-V	Akt-R-V	Akt_pS473-R-V	Akt_pT308-R-V	AMPK-a2_pS345-R-V	AMPKa-R-C	AMPKa_pT172-R-C	Annexin-I-M-V	Annexin-VII-M-V	AR-R-V	ARID1A-R-C	Atg3-R-V	Atg7-R-V	ATM-R-V	ATM_pS1981-R-V	ATR_pS428-R-C	Aurora-B-R-V	Axl-R-V	b-Actin-R-C	b-Catenin-R-V	b-Catenin_pT41_S45-R-V	B-Raf-R-C	B-Raf_pS445-R-V	B7-H4-R-C	Bad_pS112-R-V	Bak-R-C	BAP1-M-V	Bax-R-V	Bcl-xL-R-V	Bcl2-M-V	Beclin-R-C	Bid-R-C	Bim-R-V
								Probabilities (QC Score)	0.928356	0.860142	0.951039	0.950514	0.952341	0.955901	0.955105	0.958116	0.916469	0.853838	0.95127	0.956545	0.862934	0.954887	0.967568	0.902441	0.92124	0.938634	0.966211	0.943151	0.966335	0.959059	0.884195	0.940566	0.933574	0.942243	0.875996	0.950027	0.933985	0.958581	0.958016	0.914757	0.935648	0.909787	0.918703	0.883895	0.917508	0.85358	0.889353	0.889503	0.887597
								Slide no.	1	2	3	4	5	6	7	8	9	10	11	12	13	14	15	16	17	18	19	20	21	22	23	24	25	26	27	28	29	30	31	32	33	34	35	36	37	38	39	40	41
Order	Sample Source	Category_1	Category_2	Category_3	Sample	Sample Name	Sample description	Sample Type	14-3-3-beta-R-V	14-3-3-zeta-R-V	4E-BP1-R-V	4E-BP1_pS65-R-V	53BP1-R-V	A-Raf-R-V	ACC1-R-C	ACC_pS79-R-V	ADAR1-M-V	Akt-R-V	Akt_pS473-R-V	Akt_pT308-R-V	AMPK-a2_pS345-R-V	AMPKa-R-C	AMPKa_pT172-R-C	Annexin-I-M-V	Annexin-VII-M-V	AR-R-V	ARID1A-R-C	Atg3-R-V	Atg7-R-V	ATM-R-V	ATM_pS1981-R-V	ATR_pS428-R-C	Aurora-B-R-V	Axl-R-V	b-Actin-R-C	b-Catenin-R-V	b-Catenin_pT41_S45-R-V	B-Raf-R-C	B-Raf_pS445-R-V	B7-H4-R-C	Bad_pS112-R-V	Bak-R-C	BAP1-M-V	Bax-R-V	Bcl-xL-R-V	Bcl2-M-V	Beclin-R-C	Bid-R-C	Bim-R-V
									RawLog2	RawLog2	RawLog2	RawLog2	RawLog2	RawLog2	RawLog2	RawLog2	RawLog2	RawLog2	RawLog2	RawLog2	RawLog2	RawLog2	RawLog2	RawLog2	RawLog2	RawLog2	RawLog2	RawLog2	RawLog2	RawLog2	RawLog2	RawLog2	RawLog2	RawLog2	RawLog2	RawLog2	RawLog2	RawLog2	RawLog2	RawLog2	RawLog2	RawLog2	RawLog2	RawLog2	RawLog2	RawLog2	RawLog2	RawLog2	RawLog2
37	Sunil Krishnan-A (Pankaj Singh-A)	18_Sunil_Krishnan-A__Pankaj_Singh-A			sample	Sunil_Krishnan-A__Pankaj_Singh-A_1	1_untreated	human cell line	-0.78068	-0.872181	0.0366209	0.252789	0.344659	-0.164429	1.61453	-0.572996	0.735223	1.51707	-0.840057	-0.49822	-1.64131	0.0487987	0.243893	0.524183	0.108328	-2.00961	1.90781	-0.596818	0.152264	-0.0192014	-2.00026	-0.716491	-1.29303	0.849344	-0.426785	1.35724	0.0626244	0.507513	0.115434	-1.88587	-0.735636	-0.95404	-0.215074	0.0917864	-0.287025	-2.25844	-1.17199	-0.576362	-1.157
38	Sunil Krishnan-A (Pankaj Singh-A)	18_Sunil_Krishnan-A__Pankaj_Singh-A			sample	Sunil_Krishnan-A__Pankaj_Singh-A_2	2_untreated	human cell line	-0.803461	-0.895583	-0.0239955	0.248103	0.37287	-0.173348	1.58716	-0.518258	0.73975	1.5787	-0.914887	-0.461528	-1.67948	0.0111123	0.295626	0.598542	0.111461	-2.01876	2.04425	-0.501526	0.185113	-0.0267544	-2.02362	-0.797138	-1.2893	0.910593	-0.472372	1.4028	0.0529662	0.535026	0.142735	-1.88999	-0.637002	-0.984794	-0.237804	-0.00953992	-0.255807	-2.30383	-1.22358	-0.593115	-1.16057
39	Sunil Krishnan-A (Pankaj Singh-A)	18_Sunil_Krishnan-A__Pankaj_Singh-A			sample	Sunil_Krishnan-A__Pankaj_Singh-A_3	3_untreated	human cell line	-0.905473	-0.976178	-0.0570967	0.103063	0.280173	-0.2931	1.54892	-0.705783	0.60574	1.48336	-0.904653	-0.66287	-1.79136	-0.131266	0.220825	0.591705	0.0662409	-2.2819	1.75191	-0.62067	0.0370397	-0.0949872	-2.18323	-0.831627	-1.49117	0.920737	-0.511915	1.26536	-0.040914	0.395468	0.0736256	-2.09508	-0.88131	-1.0992	-0.304982	-0.00764745	-0.336962	-2.44638	-1.26325	-0.679292	-1.26654
40	Sunil Krishnan-A (Pankaj Singh-A)	18_Sunil_Krishnan-A__Pankaj_Singh-A			sample	Sunil_Krishnan-A__Pankaj_Singh-A_4	4_Vehicle	human cell line	-0.890908	-0.932192	-0.0374268	0.186105	0.256821	-0.30749	1.53726	-0.675391	0.404755	1.51778	-1.20305	-0.652476	-1.78034	-0.0557064	0.0934909	0.608992	0.0458673	-2.3136	1.97744	-0.62857	0.048638	-0.173653	-2.18768	-0.877819	-1.49072	1.00111	-0.485621	1.38007	-0.0398598	0.420936	0.0925191	-2.08269	-0.870422	-1.12978	-0.314367	0.00805935	-0.311368	-2.40843	-1.25019	-0.650595	-1.28098
41	Sunil Krishnan-A (Pankaj Singh-A)	18_Sunil_Krishnan-A__Pankaj_Singh-A			sample	Sunil_Krishnan-A__Pankaj_Singh-A_5	5_Vehicle	human cell line	-0.9918	-1.03585	-0.191646	0.0968045	0.266637	-0.387635	1.39356	-0.825828	0.621127	1.39783	-1.51379	-0.765531	-1.84376	-0.089616	0.123403	0.585496	0.0516413	-2.44049	1.71063	-0.73718	-0.0334711	-0.204802	-2.23264	-0.93412	-1.53857	0.912257	-0.57857	1.21377	-0.00171525	0.314167	0.0523394	-2.09078	-0.903341	-1.16167	-0.312811	-0.0599697	-0.429486	-2.55656	-1.35387	-0.805847	-1.37968
42	Sunil Krishnan-A (Pankaj Singh-A)	18_Sunil_Krishnan-A__Pankaj_Singh-A			sample	Sunil_Krishnan-A__Pankaj_Singh-A_6	6_Vehicle	human cell line	-0.884496	-1.00263	-0.0644122	0.144578	0.322802	-0.328653	1.65805	-0.705871	0.750202	1.50488	-1.24405	-0.670264	-1.75304	-0.0160168	0.184007	0.606827	0.102743	-2.23344	1.83779	-0.574746	0.109627	-0.116907	-2.17834	-0.869123	-1.50383	0.919452	-0.478128	1.33813	0.00187285	0.475171	0.112972	-2.03632	-0.830439	-1.11041	-0.271941	-0.06929	-0.344598	-2.44253	-1.30844	-0.656493	-1.27246
43	Sunil Krishnan-A (Pankaj Singh-A)	18_Sunil_Krishnan-A__Pankaj_Singh-A			sample	Sunil_Krishnan-A__Pankaj_Singh-A_7	7_Insulin (100 nM)	human cell line	-0.936348	-1.04483	-0.0660514	0.162524	0.194034	-0.315738	1.52088	-0.711441	0.522293	1.36483	-2.11274	-0.958783	-1.8189	-0.196042	0.350952	0.578182	-0.0183632	-2.2358	1.81666	-0.596083	-0.0444901	-0.203564	-2.20937	-0.944145	-1.57956	0.840183	-0.552071	1.28653	-0.0885361	0.364526	0.0899909	-2.14956	-1.07498	-1.15305	-0.356931	-0.0504068	-0.357016	-2.6097	-1.3626	-0.723097	-1.32478
44	Sunil Krishnan-A (Pankaj Singh-A)	18_Sunil_Krishnan-A__Pankaj_Singh-A			sample	Sunil_Krishnan-A__Pankaj_Singh-A_8	8_Insulin (100 nM)	human cell line	-0.850095	-0.951515	-0.0103406	0.20986	0.260564	-0.211468	1.48716	-0.693264	0.619766	1.41293	-2.09609	-0.770667	-1.75925	-0.090342	0.473964	0.597602	0.0230526	-2.14398	1.63119	-0.586653	0.0615745	-0.155516	-2.13674	-0.895908	-1.53416	0.908552	-0.475206	1.35529	-0.00446788	0.493031	0.12646	-2.06112	-1.0218	-1.11044	-0.305519	0.0189959	-0.26207	-2.47389	-1.27856	-0.632235	-1.21778
45	Sunil Krishnan-A (Pankaj Singh-A)	18_Sunil_Krishnan-A__Pankaj_Singh-A			sample	Sunil_Krishnan-A__Pankaj_Singh-A_9	9_Insulin (100 nM)	human cell line	-0.739018	-0.982999	0.123185	0.336313	0.341214	-0.117574	1.68923	-0.533199	0.73703	1.45783	-1.83382	-0.688688	-1.70246	0.0364453	0.567396	0.632316	0.0538097	-2.02566	1.91363	-0.585418	0.133546	-0.0737738	-2.05147	-0.820252	-1.45036	0.989387	-0.439041	1.53704	0.0783474	0.501575	0.275754	-1.93716	-0.920181	-1.0254	-0.24794	0.0611127	-0.240334	-2.31778	-1.22134	-0.582524	-1.10874
46	Sunil Krishnan-A (Pankaj Singh-A)	18_Sunil_Krishnan-A__Pankaj_Singh-A			sample	Sunil_Krishnan-A__Pankaj_Singh-A_10	10_Abeta 40 (1hr)	human cell line	-0.890369	-1.14318	-0.0843838	0.143512	0.18668	-0.344433	1.49465	-0.543634	0.54023	1.39332	-1.45683	-0.864236	-1.79776	-0.180213	0.778469	0.558995	-0.095596	-2.33706	1.9642	-0.819321	-0.122837	-0.219354	-2.19508	-1.00524	-1.6127	0.976425	-0.570095	1.37546	-0.0854139	0.365775	0.137107	-2.20115	-1.07522	-1.2332	-0.375127	-0.0628114	-0.321465	-2.60154	-1.32211	-0.801544	-1.28645
47	Sunil Krishnan-A (Pankaj Singh-A)	18_Sunil_Krishnan-A__Pankaj_Singh-A			sample	Sunil_Krishnan-A__Pankaj_Singh-A_11	11_Abeta 40 (1hr)	human cell line	-0.956903	-1.10952	-0.111579	0.155333	0.25812	-0.235622	1.55267	-0.398825	0.787046	1.47432	-1.42251	-0.788578	-1.77675	-0.107108	0.807021	0.581683	-0.00909914	-2.39264	1.9174	-0.84752	0.0316838	-0.110764	-2.14142	-0.94892	-1.55399	1.0263	-0.501603	1.50801	-0.0245294	0.390154	0.159375	-2.21742	-1.00356	-1.15601	-0.353109	-0.0351428	-0.282219	-2.48602	-1.32487	-0.812179	-1.22877
48	Sunil Krishnan-A (Pankaj Singh-A)	18_Sunil_Krishnan-A__Pankaj_Singh-A			sample	Sunil_Krishnan-A__Pankaj_Singh-A_12	12_Abeta 40 (1hr)	human cell line	-0.842701	-1.02669	0.0141058	0.215934	0.355628	-0.222258	1.85392	-0.393846	0.939543	1.71165	-1.14462	-0.72667	-1.74139	-0.0533973	0.84431	0.701323	0.0142603	-2.20829	2.18932	-0.749732	-0.0166002	-0.0788978	-2.11554	-0.914432	-1.48009	1.27028	-0.486311	1.70031	-0.0218983	0.483791	0.210096	-2.17027	-0.938749	-1.04772	-0.314972	-0.0283502	-0.2354	-2.34681	-1.22968	-0.657638	-1.22494
61	Sunil Krishnan-A (Pankaj Singh-A)	18_Sunil_Krishnan-A__Pankaj_Singh-A			sample	Sunil_Krishnan-A__Pankaj_Singh-A_13	13_Abeta 40 + Insulin	human cell line	-0.863589	-1.036	-0.0752909	0.145082	0.291755	-0.312043	1.5936	-0.541106	0.608109	1.50716	-1.48419	-0.811513	-1.77162	-0.195438	0.593808	0.628538	-0.0475384	-2.40133	1.98242	-0.885061	-0.0736072	-0.195247	-2.16155	-0.879296	-1.56893	0.947756	-0.468266	1.39559	-0.0821843	0.371515	0.0913058	-2.11745	-1.08571	-1.13115	-0.349622	-0.0901452	-0.369774	-2.55481	-1.28365	-0.831284	-1.33176
62	Sunil Krishnan-A (Pankaj Singh-A)	18_Sunil_Krishnan-A__Pankaj_Singh-A			sample	Sunil_Krishnan-A__Pankaj_Singh-A_14	14_Abeta 40 + Insulin	human cell line	-0.834336	-1.0125	-0.119704	0.0980895	0.189754	-0.291089	1.54167	-0.464045	0.54313	1.54114	-1.52545	-0.77303	-1.73845	-0.130897	0.613571	0.651186	0.021216	-2.32676	1.9429	-0.754797	-0.053896	-0.162869	-2.09832	-0.916133	-1.5205	1.00842	-0.495041	1.32297	-0.0557049	0.382902	0.0899046	-2.04864	-0.999831	-1.13262	-0.323453	-0.0923221	-0.381737	-2.47135	-1.22649	-0.808002	-1.26853
63	Sunil Krishnan-A (Pankaj Singh-A)	18_Sunil_Krishnan-A__Pankaj_Singh-A			sample	Sunil_Krishnan-A__Pankaj_Singh-A_15	15_Abeta 40 + Insulin	human cell line	-0.728427	-0.810669	0.0910463	0.282911	0.432667	-0.156187	1.91131	-0.267424	0.865982	1.80783	-1.2868	-0.646436	-1.63611	-0.0272937	0.870304	0.782722	0.10437	-1.94142	2.19373	-0.601517	0.140372	-0.048255	-1.98962	-0.768993	-1.41081	1.22394	-0.405051	1.59901	0.0768168	0.595023	0.249196	-1.96566	-0.899604	-1.01563	-0.181064	0.0923137	-0.22608	-2.31911	-1.16002	-0.568823	-1.14501
64	Sunil Krishnan-A (Pankaj Singh-A)	18_Sunil_Krishnan-A__Pankaj_Singh-A			sample	Sunil_Krishnan-A__Pankaj_Singh-A_16	16_Abeta 42 (1hr)	human cell line	-0.891027	-0.979186	-0.154922	0.0787228	0.213523	-0.307091	1.5125	-0.771715	0.539762	1.46762	-1.64758	-0.725581	-1.78353	-0.143716	-0.14114	0.61196	-0.0121368	-2.20966	1.86336	-0.711307	-0.0345722	-0.187017	-2.09851	-0.857679	-1.54018	0.931424	-0.538147	1.33115	-0.0370309	0.423628	0.0755458	-2.12736	-0.986794	-1.12478	-0.322685	-0.042864	-0.367659	-2.44842	-1.24389	-0.760466	-1.27728
65	Sunil Krishnan-A (Pankaj Singh-A)	18_Sunil_Krishnan-A__Pankaj_Singh-A			sample	Sunil_Krishnan-A__Pankaj_Singh-A_17	17_Abeta 42 (1hr)	human cell line	-0.910657	-1.01328	-0.0906914	0.1257	0.27944	-0.281615	1.59773	-0.813061	0.64282	1.5124	-1.6913	-0.752323	-1.76381	-0.132204	-0.0584123	0.500791	0.0245163	-2.23415	2.08753	-0.746008	-0.0269441	-0.150913	-2.19156	-0.885719	-1.54111	1.01583	-0.550101	1.38623	-0.0181222	0.457394	0.0976227	-2.10999	-0.945361	-1.19447	-0.332924	-0.0749684	-0.344625	-2.52652	-1.23407	-0.74747	-1.32006
66	Sunil Krishnan-A (Pankaj Singh-A)	18_Sunil_Krishnan-A__Pankaj_Singh-A			sample	Sunil_Krishnan-A__Pankaj_Singh-A_18	18_Abeta 42 (1hr)	human cell line	-0.833691	-0.922552	-0.0681338	0.171907	0.297084	-0.205733	1.65331	-0.620703	0.711643	1.50131	-1.52411	-0.62688	-1.66526	-0.0250495	0.0108816	0.556615	0.0716456	-2.11404	2.03936	-0.575109	0.0569838	-0.102669	-2.07976	-0.831842	-1.43078	0.959468	-0.469609	1.33521	0.0487487	0.531478	0.100644	-1.92968	-0.806485	-1.05854	-0.256268	-0.0546475	-0.297147	-2.36103	-1.16434	-0.674062	-1.21038
67	Sunil Krishnan-A (Pankaj Singh-A)	18_Sunil_Krishnan-A__Pankaj_Singh-A			sample	Sunil_Krishnan-A__Pankaj_Singh-A_19	19_Abeta 42 + Insulin	human cell line	-0.916871	-1.05048	-0.0819354	0.0280867	0.206699	-0.305002	1.57363	-0.871249	0.582838	1.31035	-1.72244	-0.891024	-1.80676	-0.262038	-0.182947	0.598801	-0.0617706	-2.25558	1.93936	-0.688935	-0.0798309	-0.217354	-2.20318	-0.931781	-1.54179	0.870695	-0.554966	1.36545	-0.106519	0.337237	0.0690077	-2.14113	-1.05363	-1.17072	-0.435926	-0.0603289	-0.344453	-2.47278	-1.30511	-0.760186	-1.25087
68	Sunil Krishnan-A (Pankaj Singh-A)	18_Sunil_Krishnan-A__Pankaj_Singh-A			sample	Sunil_Krishnan-A__Pankaj_Singh-A_20	20_Abeta 42 + Insulin	human cell line	-0.815544	-0.970459	-0.0177796	0.115161	0.21125	-0.242733	1.58127	-0.831246	0.617058	1.36281	-1.71444	-0.767831	-1.75735	-0.13958	-0.0349661	0.562964	0.0135422	-2.22131	1.95424	-0.669405	0.0128663	-0.186543	-2.16108	-0.894256	-1.51083	0.926724	-0.517808	1.35008	-0.0127613	0.404209	0.0874222	-2.05759	-0.998242	-1.11716	-0.342342	-0.0460728	-0.304354	-2.4533	-1.23617	-0.720003	-1.26698
69	Sunil Krishnan-A (Pankaj Singh-A)	18_Sunil_Krishnan-A__Pankaj_Singh-A			sample	Sunil_Krishnan-A__Pankaj_Singh-A_21	21_Abeta 42 + Insulin	human cell line	-0.84632	-1.10416	-0.0884275	0.0943613	0.165534	-0.295351	1.59871	-0.827239	0.58586	1.37177	-1.76048	-0.853452	-1.82774	-0.220437	-0.0743453	0.554886	-0.0996674	-2.436	2.00527	-0.824433	-0.0875447	-0.209912	-2.18202	-0.991101	-1.53583	0.851922	-0.627561	1.38776	-0.0756532	0.327517	0.105083	-2.17148	-1.02214	-1.20548	-0.417635	-0.125634	-0.383284	-2.51172	-1.30828	-0.868888	-1.33783
70	Sunil Krishnan-A (Pankaj Singh-A)	18_Sunil_Krishnan-A__Pankaj_Singh-A			sample	Sunil_Krishnan-A__Pankaj_Singh-A_22	22_untreated	human cell line	-1.37715	-1.68254	-0.942742	-0.899169	-0.534937	-0.828093	0.161557	-2.06113	-0.213404	1.37985	-1.67678	-1.1053	-2.41645	-0.548978	0.256768	0.0280292	-0.639224	-2.57615	0.33143	-1.27941	-0.0540504	-0.669838	-2.55752	-1.82501	-2.54488	-0.359341	-1.04368	-0.154999	-0.729661	-0.749306	-0.992046	-2.58747	-1.41822	-1.7154	-1.47124	-0.560843	-1.06726	-3.25143	-1.96303	-1.77806	-2.44286
71	Sunil Krishnan-A (Pankaj Singh-A)	18_Sunil_Krishnan-A__Pankaj_Singh-A			sample	Sunil_Krishnan-A__Pankaj_Singh-A_23	23_untreated	human cell line	-1.59417	-2.0431	-1.20218	-1.07855	-0.730383	-0.980657	0.0728593	-2.38373	-0.288196	1.44918	-1.84345	-1.25155	-2.60744	-0.745099	0.160533	-0.0606555	-0.766979	-3.04018	-0.0119776	-1.45256	-0.199281	-0.722516	-2.9596	-1.98955	-2.99498	-0.468756	-1.19293	-0.280342	-0.875726	-0.977584	-1.31552	-2.80311	-1.62733	-1.97441	-1.70026	-0.804964	-1.384	-3.34029	-2.5315	-2.02673	-2.63328
72	Sunil Krishnan-A (Pankaj Singh-A)	18_Sunil_Krishnan-A__Pankaj_Singh-A			sample	Sunil_Krishnan-A__Pankaj_Singh-A_24	24_untreated	human cell line	-1.54485	-1.96035	-1.16475	-1.03506	-0.608192	-0.88669	-0.00964679	-2.32866	-0.170864	1.24833	-1.79784	-1.21446	-2.55304	-0.666289	0.201559	-0.0694263	-0.661366	-2.92372	0.0239076	-1.45742	-0.164951	-0.676558	-2.90313	-1.92062	-2.93637	-0.423657	-1.15495	-0.245225	-0.91628	-0.905501	-1.24653	-2.76373	-1.48888	-1.79699	-1.59332	-0.767819	-1.4092	-3.27015	-2.42346	-1.96627	-2.57555
85	Sunil Krishnan-A (Pankaj Singh-A)	18_Sunil_Krishnan-A__Pankaj_Singh-A			sample	Sunil_Krishnan-A__Pankaj_Singh-A_25	25_Vehicle	human cell line	-1.51191	-1.68372	-1.05223	-1.0038	-0.697209	-0.891894	0.0110403	-2.2903	-0.460163	1.39268	-1.80544	-1.21145	-2.52476	-0.679484	0.208231	-0.0199362	-0.656188	-2.89303	-0.108371	-1.40499	-0.137118	-0.689526	-2.95633	-1.98482	-2.92132	-0.463202	-1.20673	-0.336575	-0.827107	-0.916643	-1.27379	-2.79151	-1.57503	-1.98747	-1.47311	-0.731828	-1.30806	-3.30546	-2.0459	-1.9329	-2.66469
86	Sunil Krishnan-A (Pankaj Singh-A)	18_Sunil_Krishnan-A__Pankaj_Singh-A			sample	Sunil_Krishnan-A__Pankaj_Singh-A_26	26_Vehicle	human cell line	-1.37726	-1.58356	-0.963925	-0.926629	-0.671857	-0.88643	0.187761	-2.11774	-0.404979	1.46446	-1.69262	-1.14593	-2.43889	-0.591314	0.368973	0.147221	-0.555282	-2.76467	-0.361641	-1.35465	-0.0744213	-0.57477	-2.77027	-1.87201	-2.58879	-0.385147	-1.11197	-0.171881	-0.798433	-0.802387	-1.03387	-2.64301	-1.46637	-1.73925	-1.40457	-0.589895	-1.07339	-3.2547	-2.02813	-1.80909	-2.55819
87	Sunil Krishnan-A (Pankaj Singh-A)	18_Sunil_Krishnan-A__Pankaj_Singh-A			sample	Sunil_Krishnan-A__Pankaj_Singh-A_27	27_Vehicle	human cell line	-1.39436	-1.53062	-0.981621	-0.921788	-0.544794	-0.801945	0.206695	-2.10845	-0.295951	1.44212	-1.67844	-1.09169	-2.42092	-0.591898	0.305823	0.193707	-0.525855	-2.30784	-0.00186258	-1.30268	-0.0312841	-0.498448	-2.64233	-1.84355	-2.79617	-0.377022	-1.09318	-0.227462	-0.78075	-0.774012	-0.988058	-2.61614	-1.42307	-1.71311	-1.35822	-0.532834	-1.07217	-3.21888	-1.95668	-1.75557	-2.51251
88	Sunil Krishnan-A (Pankaj Singh-A)	18_Sunil_Krishnan-A__Pankaj_Singh-A			sample	Sunil_Krishnan-A__Pankaj_Singh-A_28	28_Insulin (100 nM)	human cell line	-1.40853	-1.54743	-0.993024	-0.968721	-0.700927	-0.757613	0.24085	-2.11822	-0.39461	1.40853	-1.82106	-1.1786	-2.45673	-0.627742	0.258851	0.220949	-0.557973	-2.71561	-0.05586	-1.27864	0.0102259	-0.599747	-2.67704	-2.04063	-2.60032	-0.221822	-1.1007	-0.332	-0.744463	-0.847408	-0.981607	-2.69056	-1.5062	-1.72996	-1.26444	-0.589884	-1.08019	-3.18253	-1.95171	-1.81172	-2.5983
89	Sunil Krishnan-A (Pankaj Singh-A)	18_Sunil_Krishnan-A__Pankaj_Singh-A			sample	Sunil_Krishnan-A__Pankaj_Singh-A_29	29_Insulin (100 nM)	human cell line	-1.27277	-1.44507	-0.831822	-0.772241	-0.532911	-0.607801	0.373931	-2.00654	-0.172115	1.5323	-1.57847	-1.13008	-2.33529	-0.437791	0.497198	0.347775	-0.376568	-2.42939	0.302822	-1.19239	0.144188	-0.421173	-2.57994	-1.72278	-2.49174	-0.0999312	-0.991084	-0.183265	-0.690236	-0.680434	-0.875567	-2.50911	-1.30946	-1.64612	-1.06923	-0.45007	-0.968525	-3.06852	-1.83227	-1.53117	-2.50559
90	Sunil Krishnan-A (Pankaj Singh-A)	18_Sunil_Krishnan-A__Pankaj_Singh-A			sample	Sunil_Krishnan-A__Pankaj_Singh-A_30	30_Insulin (100 nM)	human cell line	-1.29166	-1.538	-0.923596	-0.911361	-0.546168	-0.751494	0.250549	-2.0448	-0.295368	1.4265	-1.60048	-1.12578	-2.36512	-0.583536	0.455613	0.208182	-0.486953	-2.62186	-0.00993795	-1.22009	0.0649992	-0.485854	-2.63119	-1.77126	-2.51008	-0.184177	-1.05441	-0.257932	-0.761681	-0.783567	-0.950822	-2.53742	-1.42835	-1.71348	-1.39168	-0.488717	-1.03678	-3.10726	-1.90021	-1.64729	-2.57951
91	Sunil Krishnan-A (Pankaj Singh-A)	18_Sunil_Krishnan-A__Pankaj_Singh-A			sample	Sunil_Krishnan-A__Pankaj_Singh-A_31	31_Abeta 40 (1hr)	human cell line	-1.5504	-1.79648	-1.07145	-1.10982	-0.838271	-1.04479	-0.0438019	-2.59828	-0.470706	1.18674	-1.67573	-1.19122	-2.64334	-0.778082	0.322103	-0.215053	-0.711466	-2.86281	-0.304645	-1.39348	-0.27188	-0.735479	-3.0763	-1.98958	-3.05505	-0.473342	-1.30423	-0.592768	-1.05847	-0.93582	-1.32684	-2.79144	-1.73943	-1.99915	-1.66521	-0.701696	-1.37938	-3.44081	-2.12283	-2.02178	-2.77189
92	Sunil Krishnan-A (Pankaj Singh-A)	18_Sunil_Krishnan-A__Pankaj_Singh-A			sample	Sunil_Krishnan-A__Pankaj_Singh-A_32	32_Abeta 40 (1hr)	human cell line	-1.30104	-1.47071	-0.696189	-0.82566	-0.573485	-0.633169	0.361907	-2.02892	-0.166849	1.4412	-1.3375	-0.918452	-2.34638	-0.498959	0.646358	0.25799	-0.49173	-2.28732	-0.0571916	-1.19082	0.136179	-0.437721	-2.56986	-1.77351	-2.51448	-0.0677375	-1.03159	-0.228272	-0.681437	-0.724959	-0.910503	-2.49247	-1.39504	-1.63098	-1.16972	-0.396976	-0.996723	-3.18728	-1.8939	-1.62384	-2.55668
93	Sunil Krishnan-A (Pankaj Singh-A)	18_Sunil_Krishnan-A__Pankaj_Singh-A			sample	Sunil_Krishnan-A__Pankaj_Singh-A_33	33_Abeta 40 (1hr)	human cell line	-1.28412	-1.59768	-0.800495	-0.913765	-0.567768	-0.733445	0.29715	-2.19619	-0.201777	1.35607	-1.37282	-0.98247	-2.41461	-0.518027	0.552893	0.156552	-0.552219	-2.56181	0.0629033	-1.27377	0.00570486	-0.546434	-2.59339	-1.87252	-2.82732	-0.253584	-1.05078	-0.226533	-0.695327	-0.749536	-0.92529	-2.57755	-1.44052	-1.68945	-1.42988	-0.554069	-1.02077	-3.18455	-1.97794	-1.8833	-2.47196
94	Sunil Krishnan-A (Pankaj Singh-A)	18_Sunil_Krishnan-A__Pankaj_Singh-A			sample	Sunil_Krishnan-A__Pankaj_Singh-A_34	34_Abeta 40 + Insulin	human cell line	-1.28123	-1.62271	-0.813341	-0.925372	-0.502565	-0.763941	0.26236	-2.07875	-0.127365	1.3878	-1.43381	-1.0191	-2.38589	-0.520967	0.647037	0.194872	-0.561059	-2.39893	-0.0433918	-1.2314	0.0576224	-0.50686	-2.60737	-1.80322	-2.61769	-0.202285	-1.07311	-0.0713716	-0.70187	-0.706929	-0.920392	-2.53503	-1.39714	-1.66004	-1.3228	-0.48451	-1.01639	-3.12605	-1.93654	-1.81395	-2.43377
95	Sunil Krishnan-A (Pankaj Singh-A)	18_Sunil_Krishnan-A__Pankaj_Singh-A			sample	Sunil_Krishnan-A__Pankaj_Singh-A_35	35_Abeta 40 + Insulin	human cell line	-1.21638	-1.61165	-0.776594	-0.836312	-0.421662	-0.696461	0.417425	-1.91248	0.0507683	1.68745	-1.8096	-0.909755	-2.30733	-0.388293	0.968516	0.254446	-0.505812	-2.31209	0.0338505	-1.20882	0.158281	-0.281216	-2.57157	-1.76616	-2.53914	-0.0225712	-0.979492	0.0318677	-0.615361	-0.635415	-0.87905	-2.50639	-1.25134	-1.55695	-1.37218	-0.396649	-0.962122	-2.99148	-1.88521	-1.62047	-2.33747
96	Sunil Krishnan-A (Pankaj Singh-A)	18_Sunil_Krishnan-A__Pankaj_Singh-A			sample	Sunil_Krishnan-A__Pankaj_Singh-A_36	36_Abeta 40 + Insulin	human cell line	-1.13468	-1.71261	-0.840281	-0.847803	-0.439351	-0.658777	0.297116	-2.01753	0.0633734	1.55678	-1.30132	-0.968899	-2.36922	-0.469063	0.719263	0.148402	-0.530158	-2.41573	0.410486	-1.28277	0.0677939	-0.398657	-2.58646	-1.77948	-2.83351	-0.156534	-1.08101	-0.0127634	-0.710032	-0.741984	-0.905621	-2.65177	-1.25317	-1.61758	-1.18378	-0.464345	-1.09546	-3.09404	-1.90364	-1.59101	-2.30814
109	Sunil Krishnan-A (Pankaj Singh-A)	18_Sunil_Krishnan-A__Pankaj_Singh-A			sample	Sunil_Krishnan-A__Pankaj_Singh-A_37	37_Abeta 42 (1hr)	human cell line	-1.53886	-1.59629	-1.07496	-0.980631	-0.672076	-0.871155	0.135378	-2.25146	-0.380868	1.38722	-2.03304	-1.19955	-2.49722	-0.681462	0.10202	0.135022	-0.548425	-2.92639	-0.155644	-1.33743	-0.0795437	-0.681415	-3.00131	-1.87759	-2.9273	-0.363726	-1.10169	-0.473846	-0.794888	-0.928226	-1.28073	-2.67489	-1.7326	-1.74842	-1.48052	-0.636158	-0.999975	-3.32288	-2.01234	-1.95004	-2.56339
110	Sunil Krishnan-A (Pankaj Singh-A)	18_Sunil_Krishnan-A__Pankaj_Singh-A			sample	Sunil_Krishnan-A__Pankaj_Singh-A_38	38_Abeta 42 (1hr)	human cell line	-1.34605	-1.51293	-0.983914	-0.889522	-0.639256	-0.767156	0.247035	-1.97579	-0.288516	1.40653	-1.87964	-1.16749	-2.39394	-0.559955	0.259531	0.231881	-0.466827	-2.51475	-0.209675	-1.28449	0.0468711	-0.576554	-2.61573	-1.76655	-2.5234	-0.260913	-1.02784	-0.213551	-0.692287	-0.800316	-0.943716	-2.54458	-1.47058	-1.68666	-1.17263	-0.615661	-1.03252	-3.28625	-1.95813	-1.87669	-2.60986
111	Sunil Krishnan-A (Pankaj Singh-A)	18_Sunil_Krishnan-A__Pankaj_Singh-A			sample	Sunil_Krishnan-A__Pankaj_Singh-A_39	39_Abeta 42 (1hr)	human cell line	-1.30946	-1.42686	-0.795509	-0.827515	-0.523996	-0.668291	0.366859	-1.95293	-0.171975	1.56921	-1.74896	-1.07485	-2.34763	-0.496705	0.479983	0.297191	-0.360684	-2.22547	-0.178464	-1.22846	0.0611451	-0.421629	-2.61045	-1.78644	-2.49017	-0.130951	-0.964136	-0.141586	-0.691133	-0.73846	-0.923891	-2.50062	-1.36548	-1.63072	-1.18775	-0.443827	-0.978518	-3.12674	-1.87046	-1.74672	-2.51275
112	Sunil Krishnan-A (Pankaj Singh-A)	18_Sunil_Krishnan-A__Pankaj_Singh-A			sample	Sunil_Krishnan-A__Pankaj_Singh-A_40	40_Abeta 42 + Insulin	human cell line	-1.39205	-1.54629	-1.05008	-0.942656	-0.644076	-0.898356	0.15488	-2.12815	-0.326741	1.40077	-1.92514	-1.22487	-2.41494	-0.65313	0.324287	0.162854	-0.596455	-2.64426	0.144911	-1.33603	-0.111327	-0.60925	-2.61365	-1.80674	-2.57212	-0.304087	-1.08594	-0.319509	-0.826952	-0.901639	-0.998453	-2.59713	-1.58299	-1.70104	-1.23401	-0.675545	-1.07541	-3.21009	-1.87286	-1.88626	-2.68068
113	Sunil Krishnan-A (Pankaj Singh-A)	18_Sunil_Krishnan-A__Pankaj_Singh-A			sample	Sunil_Krishnan-A__Pankaj_Singh-A_41	41_Abeta 42 + Insulin	human cell line	-1.24772	-1.36419	-0.715565	-0.690195	-0.393198	-0.638951	0.385231	-1.64584	-0.0742468	1.61114	-1.74621	-1.08741	-2.25878	-0.35082	0.664096	0.330782	-0.317852	-2.20816	0.494906	-1.16376	0.129534	-0.308664	-2.50877	-1.60898	-2.44552	-0.0408283	-0.888487	-0.0596558	-0.541749	-0.652133	-0.845529	-2.44395	-1.2228	-1.58992	-1.06919	-0.409887	-0.912499	-2.97229	-1.79233	-1.50027	-2.2914
114	Sunil Krishnan-A (Pankaj Singh-A)	18_Sunil_Krishnan-A__Pankaj_Singh-A			sample	Sunil_Krishnan-A__Pankaj_Singh-A_42	42_Abeta 42 + Insulin	human cell line	-1.28817	-1.50691	-0.800315	-0.776206	-0.4407	-0.713244	0.277794	-1.81592	-0.209253	1.46276	-1.7564	-1.11232	-2.22296	-0.472214	0.574291	0.280654	-0.387881	-2.40287	0.355305	-1.20085	0.0864632	-0.371785	-2.51888	-1.68003	-2.60581	-0.160777	-0.962427	-0.144697	-0.692153	-0.704784	-0.898068	-2.45905	-1.25764	-1.59172	-1.1421	-0.495748	-0.972824	-3.11125	-1.86032	-1.60561	-2.4428
[truncated: 265 more columns]

## Sheet: NormLinear
								Antibody Name	14-3-3-beta	14-3-3-zeta	4E-BP1	4E-BP1_pS65	53BP1	A-Raf	ACC1	ACC_pS79	ADAR1	Akt	Akt_pS473	Akt_pT308	AMPK-a2_pS345	AMPKa	AMPKa_pT172	Annexin-I	Annexin-VII	AR	ARID1A	Atg3	Atg7	ATM	ATM_pS1981	ATR_pS428	Aurora-B	Axl	b-Actin	b-Catenin	b-Catenin_pT41_S45	B-Raf	B-Raf_pS445	B7-H4	Bad_pS112	Bak	BAP1	Bax	Bcl-xL	Bcl2	Beclin	Bid	Bim
								Antibody Origin	R	R	R	R	R	R	R	R	M	R	R	R	R	R	R	M	M	R	R	R	R	R	R	R	R	R	R	R	R	R	R	R	R	R	M	R	R	M	R	R	R
								Gene Name	YWHAB	YWHAZ	EIF4EBP1	EIF4EBP1	TP53BP1	ARAF	ACACA/ ACACB	ACACA/ACACB	ADAR	AKT1/2/3	AKT1/2/3	AKT1/2/3	PRKAA2	PRKAA1/2	PRKAA1/2	ANXA1	ANXA7	AR	ARID1A	ATG3	ATG7	ATM	ATM	ATR	AURKB	AXL	ACTB	CTNNB1	CTNNB1	BRAF	BRAF	VTCN1	BAD	BAK1	BAP1	BAX	BCL2L1	BCL2	BECN1	BID	BCL2L11
								Validation Status	V	V	V	V	V	V	C	V	V	V	V	V	V	C	C	V	V	V	C	V	V	V	V	C	V	V	C	V	V	C	V	C	V	C	V	V	V	V	C	C	V
								Slide Id	GBL1144582	GBL1144583	GBL1144348	GBL1144349	GBL1144437	GBL1144487	GBL1144351	GBL1144350	GBL1144609	GBL1144660	GBL1144374	GBL1144474	GBL1144504	GBL1144352	GBL1144353	GBL1144612	GBL1144608	GBL1144565	GBL1144515	GBL1144523	GBL1144524	GBL1144506	GBL1144507	GBL1144546	GBL1144512	GBL1144497	GBL1144480	GBL1144357	GBL1144481	GBL1144559	GBL1144361	GBL1144541	GBL1144354	GBL1144355	GBL1144636	GBL1144356	GBL1144358	GBL1144624	GBL1144591	GBL1144359	GBL1144360
								Antibody Name in Heatmap	14-3-3-beta-R-V	14-3-3-zeta-R-V	4E-BP1-R-V	4E-BP1_pS65-R-V	53BP1-R-V	A-Raf-R-V	ACC1-R-C	ACC_pS79-R-V	ADAR1-M-V	Akt-R-V	Akt_pS473-R-V	Akt_pT308-R-V	AMPK-a2_pS345-R-V	AMPKa-R-C	AMPKa_pT172-R-C	Annexin-I-M-V	Annexin-VII-M-V	AR-R-V	ARID1A-R-C	Atg3-R-V	Atg7-R-V	ATM-R-V	ATM_pS1981-R-V	ATR_pS428-R-C	Aurora-B-R-V	Axl-R-V	b-Actin-R-C	b-Catenin-R-V	b-Catenin_pT41_S45-R-V	B-Raf-R-C	B-Raf_pS445-R-V	B7-H4-R-C	Bad_pS112-R-V	Bak-R-C	BAP1-M-V	Bax-R-V	Bcl-xL-R-V	Bcl2-M-V	Beclin-R-C	Bid-R-C	Bim-R-V
								Probabilities (QC Score)	0.928356	0.860142	0.951039	0.950514	0.952341	0.955901	0.955105	0.958116	0.916469	0.853838	0.95127	0.956545	0.862934	0.954887	0.967568	0.902441	0.92124	0.938634	0.966211	0.943151	0.966335	0.959059	0.884195	0.940566	0.933574	0.942243	0.875996	0.950027	0.933985	0.958581	0.958016	0.914757	0.935648	0.909787	0.918703	0.883895	0.917508	0.85358	0.889353	0.889503	0.887597
								Slide no.	1	2	3	4	5	6	7	8	9	10	11	12	13	14	15	16	17	18	19	20	21	22	23	24	25	26	27	28	29	30	31	32	33	34	35	36	37	38	39	40	41
Order	Sample Source	Category_1	Category_2	Category_3	CF1&2 Outliers	Sample Name	Sample description	Sample Type	14-3-3-beta-R-V	14-3-3-zeta-R-V	4E-BP1-R-V	4E-BP1_pS65-R-V	53BP1-R-V	A-Raf-R-V	ACC1-R-C	ACC_pS79-R-V	ADAR1-M-V	Akt-R-V	Akt_pS473-R-V	Akt_pT308-R-V	AMPK-a2_pS345-R-V	AMPKa-R-C	AMPKa_pT172-R-C	Annexin-I-M-V	Annexin-VII-M-V	AR-R-V	ARID1A-R-C	Atg3-R-V	Atg7-R-V	ATM-R-V	ATM_pS1981-R-V	ATR_pS428-R-C	Aurora-B-R-V	Axl-R-V	b-Actin-R-C	b-Catenin-R-V	b-Catenin_pT41_S45-R-V	B-Raf-R-C	B-Raf_pS445-R-V	B7-H4-R-C	Bad_pS112-R-V	Bak-R-C	BAP1-M-V	Bax-R-V	Bcl-xL-R-V	Bcl2-M-V	Beclin-R-C	Bid-R-C	Bim-R-V
									NormLinear	NormLinear	NormLinear	NormLinear	NormLinear	NormLinear	NormLinear	NormLinear	NormLinear	NormLinear	NormLinear	NormLinear	NormLinear	NormLinear	NormLinear	NormLinear	NormLinear	NormLinear	NormLinear	NormLinear	NormLinear	NormLinear	NormLinear	NormLinear	NormLinear	NormLinear	NormLinear	NormLinear	NormLinear	NormLinear	NormLinear	NormLinear	NormLinear	NormLinear	NormLinear	NormLinear	NormLinear	NormLinear	NormLinear	NormLinear	NormLinear
37	Sunil Krishnan-A (Pankaj Singh-A)	18_Sunil_Krishnan-A__Pankaj_Singh-A			nominal	Sunil_Krishnan-A__Pankaj_Singh-A_1	1_untreated	human cell line	0.921428	0.985161	1.04228	1.10248	1.02297	0.952801	1.17215	1.17718	1.06602	0.792627	1.35412	1.01187	0.986768	0.969759	0.717898	0.811704	0.94221	0.94832	1.26297	1.01538	0.836171	0.890017	0.976031	1.11761	1.21248	0.98496	0.95033	1.16294	0.980481	1.14277	1.03128	1.0292	1.01266	1.02323	1.07487	0.964415	0.976032	1.08851	0.993566	1.12905	1.15575
38	Sunil Krishnan-A (Pankaj Singh-A)	18_Sunil_Krishnan-A__Pankaj_Singh-A			nominal	Sunil_Krishnan-A__Pankaj_Singh-A_2	2_untreated	human cell line	0.910342	0.972891	1.00309	1.10296	1.04702	0.950427	1.15438	1.22721	1.07332	0.830273	1.29042	1.04177	0.964554	0.948245	0.746857	0.857795	0.947746	0.945805	1.39337	1.08872	0.858589	0.88864	0.963901	1.06076	1.2201	1.03147	0.924172	1.20469	0.977536	1.16907	1.05486	1.03006	1.08832	1.00534	1.06198	0.902325	1.00107	1.05869	0.962205	1.12013	1.15716
39	Sunil Krishnan-A (Pankaj Singh-A)	18_Sunil_Krishnan-A__Pankaj_Singh-A			nominal	Sunil_Krishnan-A__Pankaj_Singh-A_3	3_untreated	human cell line	0.929234	1.00793	1.074	1.09277	1.07567	0.958293	1.23159	1.18059	1.07156	0.851431	1.42377	0.992641	0.977855	0.941216	0.77687	0.935306	1.00626	0.86341	1.2465	1.0982	0.848866	0.92857	0.945394	1.13465	1.16213	1.13799	0.985095	1.19986	1.00346	1.16268	1.10159	0.978936	1.00656	1.01743	1.11051	0.989832	1.03672	1.05072	1.02554	1.156	1.17793
40	Sunil Krishnan-A (Pankaj Singh-A)	18_Sunil_Krishnan-A__Pankaj_Singh-A			nominal	Sunil_Krishnan-A__Pankaj_Singh-A_4	4_Vehicle	human cell line	0.929689	1.0292	1.07833	1.14645	1.04828	0.939712	1.20999	1.1942	0.923302	0.863652	1.14668	0.990259	0.975932	0.982342	0.704442	0.937532	0.98266	0.836568	1.44348	1.08176	0.847537	0.870887	0.933473	1.08839	1.15139	1.19169	0.993622	1.28674	0.994595	1.17207	1.10544	0.977937	1.00449	0.986565	1.09276	0.991101	1.04519	1.0684	1.02498	1.16795	1.15506
41	Sunil Krishnan-A (Pankaj Singh-A)	18_Sunil_Krishnan-A__Pankaj_Singh-A			nominal	Sunil_Krishnan-A__Pankaj_Singh-A_5	5_Vehicle	human cell line	0.903686	0.998501	1.01014	1.12337	1.10024	0.926659	1.14176	1.12161	1.11823	0.828479	0.963725	0.954482	0.973598	1.00025	0.749724	0.961534	1.02847	0.798649	1.25068	1.04589	0.834628	0.888458	0.943237	1.09116	1.1611	1.16807	0.971164	1.19531	1.06459	1.13466	1.12071	1.01374	1.0235	1.00596	1.14037	0.985577	1.0039	1.00507	0.994386	1.0933	1.12446
42	Sunil Krishnan-A (Pankaj Singh-A)	18_Sunil_Krishnan-A__Pankaj_Singh-A			nominal	Sunil_Krishnan-A__Pankaj_Singh-A_6	6_Vehicle	human cell line	0.926486	0.972448	1.05003	1.10516	1.08871	0.918745	1.30532	1.16004	1.16387	0.849231	1.10579	0.970433	0.986755	1.0018	0.744157	0.928764	1.01413	0.877411	1.30001	1.11405	0.877182	0.898702	0.932149	1.08636	1.13199	1.11726	0.990942	1.24004	1.01573	1.2074	1.11241	1.00194	1.0246	0.992042	1.11652	0.931976	1.01336	1.03525	0.976676	1.15403	1.15276
43	Sunil Krishnan-A (Pankaj Singh-A)	18_Sunil_Krishnan-A__Pankaj_Singh-A			nominal	Sunil_Krishnan-A__Pankaj_Singh-A_7	7_Insulin (100 nM)	human cell line	0.946754	1.00039	1.111	1.18531	1.05477	0.981952	1.25728	1.22406	1.0527	0.816345	0.641474	0.841628	0.9986	0.93669	0.884967	0.964472	0.987748	0.927902	1.35703	1.16276	0.835032	0.896471	0.96639	1.09244	1.13777	1.1202	0.997232	1.26739	1.01058	1.18454	1.15972	0.981204	0.916107	1.02024	1.11504	1.00022	1.06422	0.976621	0.996446	1.16728	1.1776
44	Sunil Krishnan-A (Pankaj Singh-A)	18_Sunil_Krishnan-A__Pankaj_Singh-A			nominal	Sunil_Krishnan-A__Pankaj_Singh-A_8	8_Insulin (100 nM)	human cell line	0.951888	1.01076	1.09363	1.16002	1.04609	0.999684	1.16323	1.17397	1.06667	0.799351	0.614574	0.908098	0.985671	0.954551	0.912729	0.925805	0.962715	0.936539	1.13017	1.10844	0.851169	0.877777	0.962499	1.0698	1.112	1.1124	0.996138	1.25891	1.01453	1.22636	1.12646	0.988023	0.900202	0.995203	1.09434	0.993968	1.07646	1.01623	1.00032	1.17737	1.20114
45	Sunil Krishnan-A (Pankaj Singh-A)	18_Sunil_Krishnan-A__Pankaj_Singh-A			nominal	Sunil_Krishnan-A__Pankaj_Singh-A_9	9_Insulin (100 nM)	human cell line	0.978284	0.941045	1.14158	1.20497	1.05266	1.01524	1.27332	1.2482	1.10096	0.78469	0.701401	0.914645	0.975591	0.991762	0.926636	0.902426	0.935833	0.967354	1.308	1.05566	0.851379	0.883961	0.971653	1.0728	1.12144	1.11954	0.971958	1.35878	1.02243	1.17391	1.18877	1.02453	0.919119	1.00451	1.08374	0.973852	1.03988	1.07753	0.990379	1.15963	1.2327
46	Sunil Krishnan-A (Pankaj Singh-A)	18_Sunil_Krishnan-A__Pankaj_Singh-A			nominal	Sunil_Krishnan-A__Pankaj_Singh-A_10	10_Abeta 40 (1hr)	human cell line	0.985211	0.941924	1.10573	1.17913	1.05778	0.970294	1.24447	1.38602	1.07437	0.839274	1.01877	0.9058	1.02142	0.95458	1.1997	0.959323	0.943731	0.871905	1.51515	1.00401	0.797204	0.893787	0.983794	1.05549	1.12081	1.24097	0.992709	1.35873	1.02085	1.19503	1.20778	0.954288	0.923261	0.9728	1.10985	0.99957	1.09947	0.990001	1.03298	1.11433	1.21895
47	Sunil Krishnan-A (Pankaj Singh-A)	18_Sunil_Krishnan-A__Pankaj_Singh-A			nominal	Sunil_Krishnan-A__Pankaj_Singh-A_11	11_Abeta 40 (1hr)	human cell line	0.913683	0.936362	1.05379	1.15456	1.07943	1.01614	1.25819	1.48818	1.23808	0.862149	1.01322	0.927049	1.00653	0.975246	1.1884	0.946433	0.973153	0.814766	1.4245	0.95619	0.861747	0.935875	0.991636	1.06587	1.1337	1.24759	1.01096	1.44653	1.03416	1.18036	1.1912	0.916383	0.94231	0.996682	1.09443	0.989549	1.09722	1.04161	1.00128	1.07425	1.2321
48	Sunil Krishnan-A (Pankaj Singh-A)	18_Sunil_Krishnan-A__Pankaj_Singh-A			nominal	Sunil_Krishnan-A__Pankaj_Singh-A_12	12_Abeta 40 (1hr)	human cell line	0.94862	0.951253	1.10283	1.15499	1.10781	0.983774	1.48713	1.43243	1.32	0.974859	1.17835	0.928234	0.989436	0.97096	1.16979	0.986333	0.948707	0.888072	1.64982	0.981522	0.799399	0.917761	0.968421	1.04714	1.14463	1.41721	0.98007	1.58538	0.993794	1.20814	1.18351	0.908219	0.945412	1.03056	1.07792	0.953676	1.08719	1.10035	1.02596	1.14695	1.185
61	Sunil Krishnan-A (Pankaj Singh-A)	18_Sunil_Krishnan-A__Pankaj_Singh-A			nominal	Sunil_Krishnan-A__Pankaj_Singh-A_13	13_Abeta 40 + Insulin	human cell line	0.967774	0.978284	1.07292	1.1382	1.097	0.956833	1.28516	1.33879	1.08585	0.875698	0.963883	0.905913	1.0029	0.910776	1.01781	0.970694	0.940801	0.804091	1.47953	0.924977	0.795375	0.876343	0.970914	1.11059	1.11401	1.17304	1.02721	1.32854	0.986547	1.15688	1.12819	0.975122	0.883792	1.00676	1.08924	0.945731	1.02524	0.986016	1.02295	1.05255	1.13901
62	Sunil Krishnan-A (Pankaj Singh-A)	18_Sunil_Krishnan-A__Pankaj_Singh-A			nominal	Sunil_Krishnan-A__Pankaj_Singh-A_14	14_Abeta 40 + Insulin	human cell line	0.968031	0.974649	1.01978	1.07989	1.00187	0.951599	1.21516	1.38427	1.01747	0.878809	0.918152	0.91197	1.0059	0.933577	1.01141	0.966517	0.967174	0.829972	1.41103	0.992326	0.790342	0.878477	0.994319	1.06114	1.12922	1.19918	0.988343	1.2383	0.984915	1.14295	1.10477	1.0025	0.919417	0.985813	1.08721	0.925597	0.996628	1.02404	1.0432	1.04848	1.16647
63	Sunil Krishnan-A (Pankaj Singh-A)	18_Sunil_Krishnan-A__Pankaj_Singh-A			nominal	Sunil_Krishnan-A__Pankaj_Singh-A_15	15_Abeta 40 + Insulin	human cell line	0.948466	1.0206	1.07448	1.11755	1.07941	0.951292	1.42941	1.4443	1.15867	0.962557	0.986287	0.906441	0.983127	0.913247	1.10018	0.963954	0.932796	0.986992	1.5286	1.00472	0.823277	0.86593	0.976108	1.06984	1.1093	1.26769	0.957741	1.36512	0.982974	1.2054	1.12324	0.966747	0.897292	0.973332	1.09251	0.957753	1.01074	1.03609	0.994558	1.12671	1.15693
64	Sunil Krishnan-A (Pankaj Singh-A)	18_Sunil_Krishnan-A__Pankaj_Singh-A			nominal	Sunil_Krishnan-A__Pankaj_Singh-A_16	16_Abeta 42 (1hr)	human cell line	0.947836	1.01575	1.01348	1.08508	1.03723	0.958399	1.21272	1.13897	1.03375	0.850496	0.859126	0.959784	0.992869	0.942325	0.610444	0.957879	0.96244	0.916694	1.35988	1.04149	0.815721	0.879773	1.01246	1.12533	1.13439	1.15776	0.97688	1.26823	1.01608	1.19728	1.11393	0.966708	0.944814	1.0094	1.10778	0.975483	1.0249	1.05957	1.04964	1.10352	1.18073
65	Sunil Krishnan-A (Pankaj Singh-A)	18_Sunil_Krishnan-A__Pankaj_Singh-A			nominal	Sunil_Krishnan-A__Pankaj_Singh-A_17	17_Abeta 42 (1hr)	human cell line	0.936163	0.993226	1.06091	1.12235	1.08704	0.976658	1.28808	1.10813	1.11165	0.878371	0.834493	0.943302	1.00776	0.951028	0.647257	0.887918	0.988404	0.902358	1.59042	1.01797	0.821041	0.903163	0.950374	1.10501	1.13504	1.22901	0.969995	1.31918	1.03074	1.22712	1.13248	0.979607	0.973523	0.962968	1.10128	0.955174	1.04266	1.00495	1.05809	1.11486	1.14762
66	Sunil Krishnan-A (Pankaj Singh-A)	18_Sunil_Krishnan-A__Pankaj_Singh-A			nominal	Sunil_Krishnan-A__Pankaj_Singh-A_18	18_Abeta 42 (1hr)	human cell line	0.920413	0.985879	1.00445	1.08019	1.0257	0.959506	1.24778	1.18021	1.08679	0.812458	0.873404	0.959125	1.00573	0.9548	0.632992	0.86028	0.951884	0.914109	1.43375	1.06818	0.811133	0.870465	0.95722	1.06917	1.14204	1.10166	0.95601	1.18688	1.00633	1.20407	1.0578	1.03465	0.999112	0.986265	1.08252	0.902947	1.00438	1.05057	1.03509	1.0934	1.15419
67	Sunil Krishnan-A (Pankaj Singh-A)	18_Sunil_Krishnan-A__Pankaj_Singh-A			nominal	Sunil_Krishnan-A__Pankaj_Singh-A_19	19_Abeta 42 + Insulin	human cell line	0.963056	1.00005	1.10277	1.08372	1.06787	0.992826	1.30876	1.09963	1.10175	0.788906	0.843763	0.885256	1.01064	0.898008	0.613421	0.981856	0.961902	0.918542	1.48278	1.09418	0.817741	0.89112	0.974015	1.10578	1.17213	1.14824	0.998795	1.34345	1.00164	1.16651	1.14706	0.990484	0.933096	1.01142	1.0594	0.996921	1.07737	1.07769	1.04067	1.14173	1.24393
68	Sunil Krishnan-A (Pankaj Singh-A)	18_Sunil_Krishnan-A__Pankaj_Singh-A			nominal	Sunil_Krishnan-A__Pankaj_Singh-A_20	20_Abeta 42 + Insulin	human cell line	0.991699	1.0147	1.10668	1.10498	1.02829	0.995048	1.26296	1.08521	1.08295	0.785317	0.814431	0.925506	1.00392	0.938361	0.652427	0.91936	0.97281	0.902899	1.43808	1.06462	0.83704	0.873851	0.962646	1.08941	1.14954	1.14585	0.983758	1.27591	1.02603	1.17294	1.11521	1.00745	0.930731	1.00759	1.08507	0.966448	1.06331	1.04854	1.04783	1.1269	1.18079
69	Sunil Krishnan-A (Pankaj Singh-A)	18_Sunil_Krishnan-A__Pankaj_Singh-A			nominal	Sunil_Krishnan-A__Pankaj_Singh-A_21	21_Abeta 42 + Insulin	human cell line	1.01611	0.968091	1.10302	1.14003	1.04275	1.00422	1.33802	1.13906	1.10929	0.82712	0.825697	0.912916	1.00077	0.928658	0.664513	0.95693	0.941401	0.814402	1.55945	1.00081	0.817232	0.899971	0.993091	1.06626	1.18256	1.13877	0.954278	1.37084	1.02814	1.16416	1.18168	0.974464	0.958201	0.992023	1.078	0.957313	1.05372	1.05396	1.0433	1.06388	1.17671
70	Sunil Krishnan-A (Pankaj Singh-A)	18_Sunil_Krishnan-A__Pankaj_Singh-A			nominal	Sunil_Krishnan-A__Pankaj_Singh-A_22	22_untreated	human cell line	1.04274	0.96125	0.904564	0.848921	0.95137	1.02918	0.732603	0.718024	0.945089	1.23319	1.29732	1.13671	0.986608	1.09644	1.2394	0.984718	0.960248	1.09567	0.724648	1.08249	1.24011	0.970083	1.13497	0.886879	0.871161	0.729188	1.06033	0.697593	0.968743	0.818257	0.818959	1.08286	1.07958	1.03289	0.769988	1.04972	0.972439	0.935796	0.982516	0.839917	0.811066
71	Sunil Krishnan-A (Pankaj Singh-A)	18_Sunil_Krishnan-A__Pankaj_Singh-A			nominal	Sunil_Krishnan-A__Pankaj_Singh-A_23	23_untreated	human cell line	1.03067	0.860136	0.868185	0.861268	0.954521	1.06374	0.791478	0.659626	1.03093	1.48653	1.32784	1.18003	0.992936	1.09956	1.33202	1.06386	1.00971	0.912568	0.656179	1.10298	1.28829	1.07454	0.986768	0.909083	0.732616	0.776558	1.09846	0.734753	1.0058	0.802495	0.751894	1.07134	1.07295	0.991633	0.754768	1.01826	0.89698	1.01089	0.761178	0.812176	0.816592
72	Sunil Krishnan-A (Pankaj Singh-A)	18_Sunil_Krishnan-A__Pankaj_Singh-A			nominal	Sunil_Krishnan-A__Pankaj_Singh-A_24	24_untreated	human cell line	1.01844	0.869856	0.850843	0.847618	0.992061	1.08416	0.713792	0.654403	1.06787	1.23504	1.30872	1.15619	0.98462	1.10895	1.30867	1.00975	1.03743	0.944698	0.642384	1.04973	1.25984	1.05932	0.979908	0.910591	0.728603	0.765102	1.07693	0.718923	0.933838	0.805584	0.753175	1.05136	1.12779	1.07086	0.776203	0.997721	0.841719	1.01341	0.78339	0.80876	0.811619
85	Sunil Krishnan-A (Pankaj Singh-A)	18_Sunil_Krishnan-A__Pankaj_Singh-A			nominal	Sunil_Krishnan-A__Pankaj_Singh-A_25	25_Vehicle	human cell line	1.04553	1.05732	0.923012	0.869155	0.935894	1.08395	0.726582	0.674341	0.876833	1.36968	1.30631	1.16257	1.00755	1.10262	1.31924	1.04857	1.04473	0.968311	0.588112	1.09231	1.28878	1.05344	0.947664	0.873946	0.738765	0.746966	1.04252	0.677124	0.996783	0.802125	0.741609	1.03485	1.06605	0.941621	0.846541	1.02643	0.905942	0.992299	1.02122	0.830519	0.765602
86	Sunil Krishnan-A (Pankaj Singh-A)	18_Sunil_Krishnan-A__Pankaj_Singh-A			nominal	Sunil_Krishnan-A__Pankaj_Singh-A_26	26_Vehicle	human cell line	1.07261	1.05908	0.916978	0.856835	0.890079	1.01678	0.767455	0.710224	0.851332	1.34523	1.32001	1.13687	0.999279	1.09531	1.37811	1.10024	1.04701	0.989066	0.461093	1.05699	1.25784	1.06592	1.00748	0.883107	0.869317	0.736831	1.04036	0.709278	0.950173	0.811348	0.818403	1.07188	1.07413	1.04512	0.829565	1.05834	0.996121	0.96049	0.966143	0.845653	0.770258
87	Sunil Krishnan-A (Pankaj Singh-A)	18_Sunil_Krishnan-A__Pankaj_Singh-A			nominal	Sunil_Krishnan-A__Pankaj_Singh-A_27	27_Vehicle	human cell line	1.02911	1.06668	0.879428	0.834685	0.943727	1.04671	0.754955	0.694002	0.891431	1.286	1.29424	1.14606	0.982345	1.06299	1.28068	1.10319	1.03747	1.31799	0.574461	1.06385	1.25828	1.09111	1.06885	0.874476	0.731004	0.719419	1.02331	0.662602	0.933886	0.803372	0.820214	1.06024	1.07463	1.03325	0.83171	1.06898	0.967936	0.955971	0.985635	0.852059	0.771887
88	Sunil Krishnan-A (Pankaj Singh-A)	18_Sunil_Krishnan-A__Pankaj_Singh-A			nominal	Sunil_Krishnan-A__Pankaj_Singh-A_28	28_Insulin (100 nM)	human cell line	1.04028	1.07629	0.890681	0.824801	0.864571	1.10186	0.789146	0.703679	0.849852	1.28258	1.19684	1.10155	0.978228	1.05851	1.26548	1.14764	1.03577	1.01419	0.564886	1.10426	1.32199	1.03831	1.06518	0.778713	0.854732	0.817818	1.0392	0.629128	0.977625	0.77943	0.841054	1.02791	1.0356	1.04252	0.906062	1.04894	0.982624	1.00079	1.00964	0.836611	0.742476
89	Sunil Krishnan-A (Pankaj Singh-A)	18_Sunil_Krishnan-A__Pankaj_Singh-A			nominal	Sunil_Krishnan-A__Pankaj_Singh-A_29	29_Insulin (100 nM)	human cell line	1.03143	1.04271	0.898817	0.852938	0.876598	1.10318	0.780982	0.686142	0.894835	1.26114	1.27787	1.02809	0.960326	1.08968	1.34719	1.13085	1.05997	1.11609	0.653667	1.05793	1.30911	1.06049	1.02819	0.875953	0.831646	0.803103	1.01185	0.629411	0.916048	0.789702	0.816897	1.05196	1.07112	0.997119	0.936147	1.04295	0.95813	0.977427	0.989796	0.917058	0.71452
90	Sunil Krishnan-A (Pankaj Singh-A)	18_Sunil_Krishnan-A__Pankaj_Singh-A			nominal	Sunil_Krishnan-A__Pankaj_Singh-A_30	30_Insulin (100 nM)	human cell line	1.078	1.03527	0.893121	0.820171	0.919762	1.05744	0.759215	0.707562	0.869974	1.24103	1.33268	1.09192	0.9961	1.04302	1.38604	1.08705	1.03975	1.03425	0.557279	1.09897	1.31221	1.07374	1.05078	0.896915	0.869525	0.802189	1.02546	0.632883	0.92316	0.778544	0.821068	1.09231	1.04451	1.00771	0.792761	1.07521	0.967705	1.0076	0.999904	0.896001	0.71883
91	Sunil Krishnan-A (Pankaj Singh-A)	18_Sunil_Krishnan-A__Pankaj_Singh-A			nominal	Sunil_Krishnan-A__Pankaj_Singh-A_31	31_Abeta 40 (1hr)	human cell line	1.07837	1.03582	0.964805	0.855462	0.899045	1.03277	0.740959	0.577015	0.922066	1.2579	1.51394	1.24891	0.983083	1.09085	1.51225	0.970246	1.06508	1.04745	0.543744	1.16635	1.24346	1.08092	0.923763	0.922716	0.713294	0.785718	1.03217	0.600572	0.899442	0.838471	0.757223	1.09626	1.00765	0.989417	0.784944	1.11024	0.913371	0.957011	1.02561	0.827207	0.752928
92	Sunil Krishnan-A (Pankaj Singh-A)	18_Sunil_Krishnan-A__Pankaj_Singh-A			nominal	Sunil_Krishnan-A__Pankaj_Singh-A_32	32_Abeta 40 (1hr)	human cell line	1.0372	1.05045	1.01259	0.842886	0.874015	1.11158	0.794243	0.692804	0.921002	1.21415	1.54867	1.22087	0.977267	1.07107	1.53201	1.08971	1.00359	1.26299	0.522293	1.08608	1.33505	1.07512	1.0618	0.867246	0.839508	0.84216	1.00892	0.625631	0.945147	0.785222	0.817678	1.09129	1.03516	1.03333	0.895416	1.10963	0.963538	0.923139	0.972581	0.88193	0.707239
93	Sunil Krishnan-A (Pankaj Singh-A)	18_Sunil_Krishnan-A__Pankaj_Singh-A			nominal	Sunil_Krishnan-A__Pankaj_Singh-A_33	33_Abeta 40 (1hr)	human cell line	1.0976	1.00611	0.9852	0.82935	0.917763	1.08454	0.794238	0.645279	0.940236	1.19712	1.58058	1.22149	0.974906	1.10552	1.50182	1.06234	1.00656	1.09209	0.593686	1.07247	1.27559	1.04285	1.09257	0.846889	0.70687	0.774355	1.04128	0.655137	0.979058	0.807392	0.84649	1.07602	1.04908	1.03783	0.781988	1.04083	0.991104	0.967342	0.959661	0.770584	0.784442
94	Sunil Krishnan-A (Pankaj Singh-A)	18_Sunil_Krishnan-A__Pankaj_Singh-A			nominal	Sunil_Krishnan-A__Pankaj_Singh-A_34	34_Abeta 40 + Insulin	human cell line	1.09558	0.985004	0.972714	0.819542	0.956503	1.05778	0.772335	0.697313	0.9862	1.21903	1.50933	1.18629	0.990691	1.09903	1.59693	1.08675	0.996565	1.21793	0.549398	1.10018	1.31725	1.06773	1.07788	0.885151	0.814282	0.799301	1.02135	0.726722	0.970883	0.828397	0.846105	1.10394	1.07695	1.05513	0.839003	1.08804	0.990298	1.0035	0.983801	0.805423	0.802386
95	Sunil Krishnan-A (Pankaj Singh-A)	18_Sunil_Krishnan-A__Pankaj_Singh-A			nominal	Sunil_Krishnan-A__Pankaj_Singh-A_35	35_Abeta 40 + Insulin	human cell line	1.06094	0.918953	0.923787	0.807059	0.936623	1.0262	0.796176	0.724446	1.03303	1.38914	1.07692	1.18476	0.968527	1.11551	1.8475	1.04854	0.958652	1.19753	0.536616	1.03464	1.30766	1.15588	1.02299	0.840809	0.796058	0.838174	1.00898	0.722722	0.954406	0.805918	0.806109	1.04254	1.10308	1.04922	0.75062	1.07058	0.951979	1.01988	0.943806	0.852692	0.794143
96	Sunil Krishnan-A (Pankaj Singh-A)	18_Sunil_Krishnan-A__Pankaj_Singh-A			nominal	Sunil_Krishnan-A__Pankaj_Singh-A_36	36_Abeta 40 + Insulin	human cell line	1.16812	0.891458	0.919602	0.833003	0.962588	1.09591	0.762066	0.700779	1.0842	1.3201	1.59364	1.18311	0.965338	1.09739	1.61715	1.01359	0.980691	1.15954	0.72484	1.02265	1.27778	1.10856	1.05339	0.866736	0.675352	0.794708	0.97841	0.729014	0.929896	0.778772	0.82337	0.980686	1.14619	1.04668	0.889885	1.06277	0.903004	0.988274	0.96947	0.905443	0.843193
109	Sunil Krishnan-A (Pankaj Singh-A)	18_Sunil_Krishnan-A__Pankaj_Singh-A			nominal	Sunil_Krishnan-A__Pankaj_Singh-A_37	37_Abeta 42 (1hr)	human cell line	0.997049	1.09149	0.882791	0.858151	0.925306	1.06843	0.769498	0.673079	0.900078	1.32578	1.08398	1.13893	0.997819	1.06985	1.19082	1.13433	1.0938	0.919321	0.552997	1.11218	1.30318	1.0293	0.892498	0.914652	0.714822	0.777569	1.08943	0.59819	0.990359	0.773123	0.717098	1.09012	0.92862	1.07976	0.818296	1.06567	1.08977	0.952563	1.01559	0.797413	0.797979
110	Sunil Krishnan-A (Pankaj Singh-A)	18_Sunil_Krishnan-A__Pankaj_Singh-A			nominal	Sunil_Krishnan-A__Pankaj_Singh-A_38	38_Abeta 42 (1hr)	human cell line	1.04084	1.05618	0.858795	0.834863	0.86455	1.04877	0.759354	0.744175	0.876407	1.22718	1.1011	1.06358	0.978961	1.06298	1.21307	1.10795	1.05712	1.11688	0.4865	1.05375	1.29922	1.01096	1.06489	0.90221	0.863794	0.76263	1.04726	0.654365	0.971189	0.771575	0.827285	1.08975	1.01704	1.02931	0.925163	0.987226	0.97311	0.892369	0.963075	0.766283	0.705711
111	Sunil Krishnan-A (Pankaj Singh-A)	18_Sunil_Krishnan-A__Pankaj_Singh-A			nominal	Sunil_Krishnan-A__Pankaj_Singh-A_39	39_Abeta 42 (1hr)	human cell line	1.02086	1.07205	0.935773	0.833387	0.895473	1.074	0.789006	0.722972	0.90856	1.31354	1.15274	1.08449	0.966659	1.06202	1.35149	1.10853	1.08803	1.30513	0.475383	1.04754	1.25472	1.07631	1.02202	0.850911	0.845237	0.797998	1.04664	0.657732	0.929429	0.770131	0.802026	1.07429	1.04603	1.02318	0.875453	1.06343	0.966017	0.953072	0.978626	0.801822	0.721815
112	Sunil Krishnan-A (Pankaj Singh-A)	18_Sunil_Krishnan-A__Pankaj_Singh-A			nominal	Sunil_Krishnan-A__Pankaj_Singh-A_40	40_Abeta 42 + Insulin	human cell line	1.05183	1.07672	0.855817	0.839514	0.898974	0.99906	0.743208	0.698584	0.890444	1.27521	1.11311	1.06637	1.00659	1.03965	1.32369	1.10192	1.00812	1.06519	0.64898	1.06079	1.2147	1.0311	1.1126	0.915411	0.871266	0.772192	1.04948	0.634354	0.92294	0.750387	0.83097	1.09626	0.981536	1.06322	0.92502	0.988093	0.985507	0.981471	1.06595	0.794174	0.700999
113	Sunil Krishnan-A (Pankaj Singh-A)	18_Sunil_Krishnan-A__Pankaj_Singh-A			nominal	Sunil_Krishnan-A__Pankaj_Singh-A_41	41_Abeta 42 + Insulin	human cell line	0.996194	1.04682	0.924761	0.856994	0.916685	1.02478	0.747144	0.836289	0.909004	1.26432	1.07982	1.00516	0.961197	1.0986	1.43559	1.06085	1.04792	1.23497	0.708829	1.02433	1.23006	1.08827	1.02533	0.899706	0.815103	0.79419	1.03125	0.650888	0.963782	0.764442	0.791719	1.04466	1.07966	0.984073	0.888623	1.01793	0.945479	0.99178	0.965895	0.889326	0.786782
114	Sunil Krishnan-A (Pankaj Singh-A)	18_Sunil_Krishnan-A__Pankaj_Singh-A			nominal	Sunil_Krishnan-A__Pankaj_Singh-A_42	42_Abeta 42 + Insulin	human cell line	1.01357	0.992198	0.91244	0.844837	0.928128	1.01848	0.725687	0.777761	0.866188	1.19366	1.12194	1.03377	1.03106	1.05678	1.41151	1.07214	1.04457	1.1291	0.673294	1.04462	1.24925	1.08999	1.06538	0.896186	0.763218	0.764723	1.02516	0.642086	0.908636	0.771227	0.798808	1.08173	1.10277	1.02842	0.884009	1.0036	0.948811	0.942476	0.964162	0.865043	0.741249
[truncated: 267 more columns]

## Sheet: NormLog2
								Antibody Name	14-3-3-beta	14-3-3-zeta	4E-BP1	4E-BP1_pS65	53BP1	A-Raf	ACC1	ACC_pS79	ADAR1	Akt	Akt_pS473	Akt_pT308	AMPK-a2_pS345	AMPKa	AMPKa_pT172	Annexin-I	Annexin-VII	AR	ARID1A	Atg3	Atg7	ATM	ATM_pS1981	ATR_pS428	Aurora-B	Axl	b-Actin	b-Catenin	b-Catenin_pT41_S45	B-Raf	B-Raf_pS445	B7-H4	Bad_pS112	Bak	BAP1	Bax	Bcl-xL	Bcl2	Beclin	Bid	Bim
								Antibody Origin	R	R	R	R	R	R	R	R	M	R	R	R	R	R	R	M	M	R	R	R	R	R	R	R	R	R	R	R	R	R	R	R	R	R	M	R	R	M	R	R	R
								Gene Name	YWHAB	YWHAZ	EIF4EBP1	EIF4EBP1	TP53BP1	ARAF	ACACA/ ACACB	ACACA/ACACB	ADAR	AKT1/2/3	AKT1/2/3	AKT1/2/3	PRKAA2	PRKAA1/2	PRKAA1/2	ANXA1	ANXA7	AR	ARID1A	ATG3	ATG7	ATM	ATM	ATR	AURKB	AXL	ACTB	CTNNB1	CTNNB1	BRAF	BRAF	VTCN1	BAD	BAK1	BAP1	BAX	BCL2L1	BCL2	BECN1	BID	BCL2L11
								Validation Status	V	V	V	V	V	V	C	V	V	V	V	V	V	C	C	V	V	V	C	V	V	V	V	C	V	V	C	V	V	C	V	C	V	C	V	V	V	V	C	C	V
								Slide Id	GBL1144582	GBL1144583	GBL1144348	GBL1144349	GBL1144437	GBL1144487	GBL1144351	GBL1144350	GBL1144609	GBL1144660	GBL1144374	GBL1144474	GBL1144504	GBL1144352	GBL1144353	GBL1144612	GBL1144608	GBL1144565	GBL1144515	GBL1144523	GBL1144524	GBL1144506	GBL1144507	GBL1144546	GBL1144512	GBL1144497	GBL1144480	GBL1144357	GBL1144481	GBL1144559	GBL1144361	GBL1144541	GBL1144354	GBL1144355	GBL1144636	GBL1144356	GBL1144358	GBL1144624	GBL1144591	GBL1144359	GBL1144360
								Antibody Name in Heatmap	14-3-3-beta-R-V	14-3-3-zeta-R-V	4E-BP1-R-V	4E-BP1_pS65-R-V	53BP1-R-V	A-Raf-R-V	ACC1-R-C	ACC_pS79-R-V	ADAR1-M-V	Akt-R-V	Akt_pS473-R-V	Akt_pT308-R-V	AMPK-a2_pS345-R-V	AMPKa-R-C	AMPKa_pT172-R-C	Annexin-I-M-V	Annexin-VII-M-V	AR-R-V	ARID1A-R-C	Atg3-R-V	Atg7-R-V	ATM-R-V	ATM_pS1981-R-V	ATR_pS428-R-C	Aurora-B-R-V	Axl-R-V	b-Actin-R-C	b-Catenin-R-V	b-Catenin_pT41_S45-R-V	B-Raf-R-C	B-Raf_pS445-R-V	B7-H4-R-C	Bad_pS112-R-V	Bak-R-C	BAP1-M-V	Bax-R-V	Bcl-xL-R-V	Bcl2-M-V	Beclin-R-C	Bid-R-C	Bim-R-V
								Probabilities (QC Score)	0.928356	0.860142	0.951039	0.950514	0.952341	0.955901	0.955105	0.958116	0.916469	0.853838	0.95127	0.956545	0.862934	0.954887	0.967568	0.902441	0.92124	0.938634	0.966211	0.943151	0.966335	0.959059	0.884195	0.940566	0.933574	0.942243	0.875996	0.950027	0.933985	0.958581	0.958016	0.914757	0.935648	0.909787	0.918703	0.883895	0.917508	0.85358	0.889353	0.889503	0.887597
								Slide no.	1	2	3	4	5	6	7	8	9	10	11	12	13	14	15	16	17	18	19	20	21	22	23	24	25	26	27	28	29	30	31	32	33	34	35	36	37	38	39	40	41
Order	Sample Source	Category_1	Category_2	Category_3	Sample	Sample Name	Sample description	Sample Type	14-3-3-beta-R-V	14-3-3-zeta-R-V	4E-BP1-R-V	4E-BP1_pS65-R-V	53BP1-R-V	A-Raf-R-V	ACC1-R-C	ACC_pS79-R-V	ADAR1-M-V	Akt-R-V	Akt_pS473-R-V	Akt_pT308-R-V	AMPK-a2_pS345-R-V	AMPKa-R-C	AMPKa_pT172-R-C	Annexin-I-M-V	Annexin-VII-M-V	AR-R-V	ARID1A-R-C	Atg3-R-V	Atg7-R-V	ATM-R-V	ATM_pS1981-R-V	ATR_pS428-R-C	Aurora-B-R-V	Axl-R-V	b-Actin-R-C	b-Catenin-R-V	b-Catenin_pT41_S45-R-V	B-Raf-R-C	B-Raf_pS445-R-V	B7-H4-R-C	Bad_pS112-R-V	Bak-R-C	BAP1-M-V	Bax-R-V	Bcl-xL-R-V	Bcl2-M-V	Beclin-R-C	Bid-R-C	Bim-R-V
									NormLog2	NormLog2	NormLog2	NormLog2	NormLog2	NormLog2	NormLog2	NormLog2	NormLog2	NormLog2	NormLog2	NormLog2	NormLog2	NormLog2	NormLog2	NormLog2	NormLog2	NormLog2	NormLog2	NormLog2	NormLog2	NormLog2	NormLog2	NormLog2	NormLog2	NormLog2	NormLog2	NormLog2	NormLog2	NormLog2	NormLog2	NormLog2	NormLog2	NormLog2	NormLog2	NormLog2	NormLog2	NormLog2	NormLog2	NormLog2	NormLog2
37	Sunil Krishnan-A (Pankaj Singh-A)	18_Sunil_Krishnan-A__Pankaj_Singh-A			sample	Sunil_Krishnan-A__Pankaj_Singh-A_1	1_untreated	human cell line	-0.118057	-0.0215678	0.0597471	0.140749	0.0327633	-0.0697532	0.229163	0.235331	0.0922378	-0.335286	0.437354	0.0170306	-0.0192167	-0.0443017	-0.47815	-0.300974	-0.0858796	-0.0765537	0.336822	0.0220259	-0.25813	-0.168095	-0.0350018	0.160419	0.277956	-0.0218627	-0.073499	0.217782	-0.028439	0.192534	0.0444322	0.0415252	0.0181471	0.0331249	0.104166	-0.0522735	-0.0350001	0.12235	-0.00931159	0.175103	0.208835
38	Sunil Krishnan-A (Pankaj Singh-A)	18_Sunil_Krishnan-A__Pankaj_Singh-A			sample	Sunil_Krishnan-A__Pankaj_Singh-A_2	2_untreated	human cell line	-0.135519	-0.0396506	0.0044498	0.141382	0.0662937	-0.0733529	0.207114	0.295388	0.102084	-0.268342	0.367843	0.0590412	-0.052066	-0.076669	-0.421097	-0.221296	-0.0774277	-0.0803852	0.478576	0.122637	-0.219961	-0.170329	-0.0530434	0.0850915	0.287002	0.0447063	-0.113766	0.268663	-0.0327781	0.225366	0.077052	0.0427321	0.122099	0.0076899	0.086755	-0.148281	0.00153729	0.0822801	-0.0555832	0.16367	0.210592
39	Sunil Krishnan-A (Pankaj Singh-A)	18_Sunil_Krishnan-A__Pankaj_Singh-A			sample	Sunil_Krishnan-A__Pankaj_Singh-A_3	3_untreated	human cell line	-0.105886	0.0113991	0.102993	0.127986	0.105241	-0.0614614	0.300517	0.239507	0.099718	-0.232039	0.509721	-0.0106567	-0.0323081	-0.0874029	-0.364254	-0.0964889	0.00899666	-0.211882	0.317888	0.135137	-0.23639	-0.106917	-0.0810118	0.182246	0.216777	0.186494	-0.0216654	0.26287	0.00498602	0.217452	0.139587	-0.030714	0.0094364	0.0249308	0.151221	-0.0147441	0.0520263	0.0713737	0.0363886	0.209136	0.236259
40	Sunil Krishnan-A (Pankaj Singh-A)	18_Sunil_Krishnan-A__Pankaj_Singh-A			sample	Sunil_Krishnan-A__Pankaj_Singh-A_4	4_Vehicle	human cell line	-0.105181	0.0415256	0.108804	0.197169	0.0680301	-0.0897098	0.274999	0.256041	-0.115125	-0.211477	0.197464	-0.0141216	-0.0351469	-0.0257022	-0.505447	-0.0930604	-0.0252358	-0.257446	0.529555	0.113378	-0.238651	-0.199442	-0.0993195	0.122195	0.203371	0.253007	-0.0092304	0.363717	-0.00781862	0.229062	0.144622	-0.0321866	0.00646509	-0.0195139	0.127977	-0.0128961	0.0637618	0.0954579	0.0355946	0.223975	0.207967
41	Sunil Krishnan-A (Pankaj Singh-A)	18_Sunil_Krishnan-A__Pankaj_Singh-A			sample	Sunil_Krishnan-A__Pankaj_Singh-A_5	5_Vehicle	human cell line	-0.146106	-0.00216441	0.0145501	0.167834	0.137812	-0.109889	0.191261	0.16557	0.161213	-0.271463	-0.0533073	-0.0672104	-0.0386024	0.000353941	-0.415569	-0.0565906	0.040504	-0.324366	0.322712	0.0647344	-0.260794	-0.170625	-0.0843082	0.12586	0.215486	0.224121	-0.0422136	0.257383	0.0902918	0.182259	0.164408	0.019692	0.0335126	0.00857005	0.189499	-0.0209593	0.00560981	0.00729501	-0.00812227	0.128689	0.169228
42	Sunil Krishnan-A (Pankaj Singh-A)	18_Sunil_Krishnan-A__Pankaj_Singh-A			sample	Sunil_Krishnan-A__Pankaj_Singh-A_6	6_Vehicle	human cell line	-0.110159	-0.0403071	0.0704283	0.144252	0.12262	-0.122264	0.384403	0.214171	0.218931	-0.235772	0.145073	-0.043299	-0.0192355	0.00259704	-0.426321	-0.106616	0.0202495	-0.188675	0.378521	0.155812	-0.189052	-0.154086	-0.101367	0.119502	0.178863	0.15996	-0.0131277	0.31039	0.0225238	0.271906	0.153685	0.00279073	0.0350584	-0.0115267	0.159013	-0.101636	0.019141	0.0499762	-0.0340473	0.206686	0.205094
43	Sunil Krishnan-A (Pankaj Singh-A)	18_Sunil_Krishnan-A__Pankaj_Singh-A			sample	Sunil_Krishnan-A__Pankaj_Singh-A_7	7_Insulin (100 nM)	human cell line	-0.0789385	0.000565545	0.151861	0.24527	0.0769247	-0.0262759	0.330304	0.291672	0.0740938	-0.292749	-0.640538	-0.248746	-0.0020214	-0.0943558	-0.176304	-0.0521894	-0.0177846	-0.107956	0.440457	0.217547	-0.260097	-0.157672	-0.0493219	0.127552	0.186205	0.163763	-0.00399843	0.341858	0.0151868	0.244333	0.213775	-0.0273755	-0.126411	0.028905	0.157096	0.000319481	0.0897956	-0.0341299	-0.00513688	0.223154	0.235845
44	Sunil Krishnan-A (Pankaj Singh-A)	18_Sunil_Krishnan-A__Pankaj_Singh-A			sample	Sunil_Krishnan-A__Pankaj_Singh-A_8	8_Insulin (100 nM)	human cell line	-0.0711361	0.0154344	0.129122	0.214156	0.065004	-0.000456165	0.218135	0.231399	0.0931168	-0.323098	-0.70234	-0.139081	-0.0208213	-0.0671064	-0.131742	-0.11122	-0.054819	-0.0945888	0.176541	0.148526	-0.232483	-0.188073	-0.0551426	0.0973381	0.153163	0.153682	-0.00558319	0.332176	0.0208048	0.294388	0.171794	-0.0173833	-0.151679	-0.00693656	0.130057	-0.00872805	0.106291	0.0232284	0.000456021	0.235566	0.2644
45	Sunil Krishnan-A (Pankaj Singh-A)	18_Sunil_Krishnan-A__Pankaj_Singh-A			sample	Sunil_Krishnan-A__Pankaj_Singh-A_9	9_Insulin (100 nM)	human cell line	-0.031674	-0.0876642	0.191032	0.268994	0.0740396	0.0218226	0.34859	0.319849	0.138766	-0.349805	-0.511689	-0.128717	-0.0356513	-0.011934	-0.109925	-0.14812	-0.0956768	-0.0478843	0.387363	0.0781468	-0.232127	-0.177946	-0.041487	0.101379	0.165349	0.162901	-0.0410338	0.442307	0.0320052	0.231317	0.249473	0.0349626	-0.121677	0.0064877	0.116021	-0.0382262	0.0564124	0.107725	-0.013947	0.213663	0.301822
46	Sunil Krishnan-A (Pankaj Singh-A)	18_Sunil_Krishnan-A__Pankaj_Singh-A			sample	Sunil_Krishnan-A__Pankaj_Singh-A_10	10_Abeta 40 (1hr)	human cell line	-0.0214946	-0.086318	0.144994	0.237722	0.0810355	-0.0435062	0.315534	0.470944	0.103496	-0.252786	0.0268338	-0.142735	0.030581	-0.0670622	0.262678	-0.059911	-0.0835525	-0.197757	0.599459	0.00577399	-0.32698	-0.161996	-0.0235722	0.077917	0.164536	0.31147	-0.0105571	0.442255	0.0297738	0.257047	0.272356	-0.0675033	-0.115189	-0.0397849	0.150364	-0.000620293	0.136811	-0.0144982	0.0468168	0.156172	0.285638
47	Sunil Krishnan-A (Pankaj Singh-A)	18_Sunil_Krishnan-A__Pankaj_Singh-A			sample	Sunil_Krishnan-A__Pankaj_Singh-A_11	11_Abeta 40 (1hr)	human cell line	-0.130234	-0.0948621	0.0755928	0.207338	0.110271	0.0230999	0.331352	0.573548	0.308107	-0.213991	0.0189431	-0.109282	0.00938646	-0.0361622	0.249025	-0.0794283	-0.0392608	-0.295542	0.510456	-0.0646304	-0.214664	-0.0956117	-0.0121174	0.0920359	0.181036	0.319139	0.0157294	0.532598	0.0484533	0.239221	0.252419	-0.125977	-0.0857269	-0.00479471	0.130177	-0.0151568	0.133853	0.0588104	0.00185181	0.103332	0.301117
48	Sunil Krishnan-A (Pankaj Singh-A)	18_Sunil_Krishnan-A__Pankaj_Singh-A			sample	Sunil_Krishnan-A__Pankaj_Singh-A_12	12_Abeta 40 (1hr)	human cell line	-0.0760972	-0.0720993	0.141213	0.207875	0.147713	-0.023601	0.572532	0.518462	0.40054	-0.0367348	0.236773	-0.107439	-0.0153222	-0.0425166	0.226248	-0.0198527	-0.0759663	-0.171251	0.72231	-0.0269077	-0.323013	-0.12381	-0.0462944	0.0664595	0.194878	0.503057	-0.0290435	0.664832	-0.00898056	0.272793	0.243075	-0.138887	-0.0809852	0.0434224	0.108249	-0.0684291	0.120606	0.137963	0.0369812	0.197808	0.244882
61	Sunil Krishnan-A (Pankaj Singh-A)	18_Sunil_Krishnan-A__Pankaj_Singh-A			sample	Sunil_Krishnan-A__Pankaj_Singh-A_13	13_Abeta 40 + Insulin	human cell line	-0.0472584	-0.0316745	0.101543	0.186749	0.133566	-0.0636602	0.361947	0.420928	0.118831	-0.191494	-0.0530706	-0.142555	0.00417672	-0.134831	0.0254726	-0.042912	-0.0880389	-0.31457	0.565139	-0.112511	-0.330294	-0.190433	-0.0425842	0.151321	0.155757	0.230257	0.0387275	0.409846	-0.0195405	0.210243	0.174011	-0.0363457	-0.178222	0.00972685	0.123325	-0.080498	0.0359582	-0.0203175	0.032732	0.0738881	0.187783
62	Sunil Krishnan-A (Pankaj Singh-A)	18_Sunil_Krishnan-A__Pankaj_Singh-A			sample	Sunil_Krishnan-A__Pankaj_Singh-A_14	14_Abeta 40 + Insulin	human cell line	-0.0468745	-0.0370455	0.0282613	0.110888	0.0026973	-0.0715751	0.281143	0.46912	0.0249839	-0.186378	-0.123195	-0.132941	0.00848038	-0.0991583	0.0163675	-0.0491329	-0.0481529	-0.268865	0.496746	-0.0111144	-0.339451	-0.186923	-0.00821906	0.0856157	0.175321	0.262049	-0.0169159	0.308355	-0.0219294	0.192761	0.143741	0.00360201	-0.121209	-0.0206141	0.120626	-0.111543	-0.0048731	0.0342728	0.0610215	0.0683024	0.222152
63	Sunil Krishnan-A (Pankaj Singh-A)	18_Sunil_Krishnan-A__Pankaj_Singh-A			sample	Sunil_Krishnan-A__Pankaj_Singh-A_15	15_Abeta 40 + Insulin	human cell line	-0.0763328	0.0294155	0.103644	0.160342	0.110243	-0.0720402	0.515421	0.530375	0.212469	-0.055056	-0.0199203	-0.141715	-0.0245504	-0.130923	0.137733	-0.0529643	-0.100366	-0.0188903	0.612212	0.00679788	-0.28055	-0.207677	-0.034887	0.0973885	0.149648	0.342202	-0.0622929	0.449025	-0.0247752	0.269515	0.167665	-0.0487903	-0.15635	-0.0389962	0.127648	-0.0622749	0.0154162	0.0511464	-0.00787238	0.172114	0.210306
64	Sunil Krishnan-A (Pankaj Singh-A)	18_Sunil_Krishnan-A__Pankaj_Singh-A			sample	Sunil_Krishnan-A__Pankaj_Singh-A_16	16_Abeta 42 (1hr)	human cell line	-0.0772903	0.0225409	0.0193178	0.117796	0.0527408	-0.0613018	0.278249	0.187725	0.0478897	-0.233624	-0.219058	-0.0592179	-0.0103244	-0.0857032	-0.712069	-0.0620841	-0.0552312	-0.125489	0.443482	0.0586497	-0.293852	-0.184797	0.0178643	0.170344	0.181916	0.211331	-0.0337471	0.342813	0.023019	0.259762	0.155657	-0.0488475	-0.0818978	0.013497	0.147668	-0.0358107	0.035479	0.0834818	0.0699013	0.142112	0.239674
65	Sunil Krishnan-A (Pankaj Singh-A)	18_Sunil_Krishnan-A__Pankaj_Singh-A			sample	Sunil_Krishnan-A__Pankaj_Singh-A_17	17_Abeta 42 (1hr)	human cell line	-0.095169	-0.00980578	0.0852993	0.166524	0.120409	-0.0340752	0.365226	0.148131	0.1527	-0.187097	-0.261027	-0.0842082	0.0111497	-0.07244	-0.62759	-0.171502	-0.0168269	-0.148228	0.669403	0.0256998	-0.284473	-0.146941	-0.073433	0.144055	0.182739	0.297492	-0.0439503	0.399639	0.0436789	0.29528	0.179485	-0.0297248	-0.0387135	-0.0544404	0.13918	-0.0661639	0.0602646	0.00712715	0.0814682	0.15686	0.198648
66	Sunil Krishnan-A (Pankaj Singh-A)	18_Sunil_Krishnan-A__Pankaj_Singh-A			sample	Sunil_Krishnan-A__Pankaj_Singh-A_18	18_Abeta 42 (1hr)	human cell line	-0.119647	-0.0205179	0.00641284	0.111287	0.0366085	-0.059637	0.319362	0.239044	0.120078	-0.299636	-0.19528	-0.0602095	0.00824845	-0.0667295	-0.65974	-0.217122	-0.0711416	-0.129561	0.519792	0.0951547	-0.301989	-0.200142	-0.0630772	0.0964881	0.191619	0.139682	-0.0649025	0.24718	0.00910581	0.26792	0.0810623	0.049144	-0.00128191	-0.0199521	0.114393	-0.147287	0.00629851	0.0711746	0.0497592	0.128823	0.206882
67	Sunil Krishnan-A (Pankaj Singh-A)	18_Sunil_Krishnan-A__Pankaj_Singh-A			sample	Sunil_Krishnan-A__Pankaj_Singh-A_19	19_Abeta 42 + Insulin	human cell line	-0.0543078	7.23867e-05	0.14113	0.115986	0.0947424	-0.0103865	0.3882	0.137017	0.139793	-0.342075	-0.24509	-0.175834	0.0152725	-0.155199	-0.70505	-0.0264171	-0.0560386	-0.122583	0.568309	0.129848	-0.290285	-0.166308	-0.0379836	0.145068	0.229131	0.199428	-0.00173956	0.425938	0.00235745	0.222197	0.197945	-0.0137946	-0.0999028	0.0163865	0.0832534	-0.00444925	0.107512	0.107943	0.0575063	0.191219	0.31491
68	Sunil Krishnan-A (Pankaj Singh-A)	18_Sunil_Krishnan-A__Pankaj_Singh-A			sample	Sunil_Krishnan-A__Pankaj_Singh-A_20	20_Abeta 42 + Insulin	human cell line	-0.0120251	0.0210505	0.146243	0.144017	0.0402504	-0.00716159	0.336805	0.117977	0.114969	-0.348653	-0.296136	-0.111685	0.00563724	-0.0917843	-0.616112	-0.121297	-0.0397694	-0.147363	0.524144	0.0903342	-0.256631	-0.19454	-0.0549234	0.12355	0.201054	0.196414	-0.0236252	0.351525	0.0370714	0.230126	0.157316	0.0107035	-0.103563	0.0109038	0.117794	-0.0492367	0.0885672	0.0683838	0.0674063	0.172359	0.239757
69	Sunil Krishnan-A (Pankaj Singh-A)	18_Sunil_Krishnan-A__Pankaj_Singh-A			sample	Sunil_Krishnan-A__Pankaj_Singh-A_21	21_Abeta 42 + Insulin	human cell line	0.0230598	-0.0467859	0.141455	0.189077	0.0603943	0.00608099	0.420102	0.187844	0.149631	-0.273832	-0.276315	-0.131446	0.00110895	-0.106781	-0.589631	-0.063515	-0.0871186	-0.296188	0.641034	0.00116683	-0.291182	-0.152049	-0.0100016	0.0925654	0.241908	0.187472	-0.067518	0.455058	0.0400399	0.219294	0.240838	-0.0373189	-0.0615992	-0.0115543	0.108361	-0.0629377	0.075497	0.0758201	0.0611538	0.0893341	0.234763
70	Sunil Krishnan-A (Pankaj Singh-A)	18_Sunil_Krishnan-A__Pankaj_Singh-A			sample	Sunil_Krishnan-A__Pankaj_Singh-A_22	22_untreated	human cell line	0.0603811	-0.0570169	-0.144705	-0.236298	-0.0719217	0.0414934	-0.448897	-0.477897	-0.0814781	0.302399	0.375538	0.184863	-0.0194517	0.132832	0.309637	-0.0222173	-0.0585206	0.131818	-0.464647	0.114347	0.310467	-0.0438202	0.182655	-0.17319	-0.198989	-0.455636	0.0845132	-0.519543	-0.0458134	-0.289374	-0.288137	0.114844	0.11047	0.0466802	-0.377092	0.0700075	-0.0403208	-0.0957333	-0.0254466	-0.251682	-0.302108
71	Sunil Krishnan-A (Pankaj Singh-A)	18_Sunil_Krishnan-A__Pankaj_Singh-A			sample	Sunil_Krishnan-A__Pankaj_Singh-A_23	23_untreated	human cell line	0.043578	-0.217363	-0.203925	-0.215465	-0.0671515	0.0891456	-0.337378	-0.60028	0.0439458	0.571947	0.409087	0.238829	-0.010227	0.136928	0.413618	0.0893144	0.0139404	-0.131996	-0.607839	0.141411	0.365453	0.103717	-0.0192165	-0.137517	-0.448871	-0.364835	0.135487	-0.44467	0.00833785	-0.317436	-0.4114	0.0994168	0.10158	-0.0121222	-0.405896	0.0261034	-0.156852	0.0156259	-0.393695	-0.300136	-0.292313
72	Sunil Krishnan-A (Pankaj Singh-A)	18_Sunil_Krishnan-A__Pankaj_Singh-A			sample	Sunil_Krishnan-A__Pankaj_Singh-A_24	24_untreated	human cell line	0.0263585	-0.201152	-0.233035	-0.238513	-0.0114997	0.116573	-0.486424	-0.611748	0.0947386	0.304553	0.388155	0.209374	-0.0223604	0.149198	0.388105	0.0140041	0.0530138	-0.0820751	-0.638493	0.0700155	0.333243	0.0831361	-0.0292815	-0.135124	-0.456795	-0.386276	0.106922	-0.476092	-0.0987556	-0.311893	-0.408944	0.0722567	0.173492	0.0987635	-0.365494	-0.00329167	-0.24859	0.0192217	-0.352197	-0.306217	-0.301126
85	Sunil Krishnan-A (Pankaj Singh-A)	18_Sunil_Krishnan-A__Pankaj_Singh-A			sample	Sunil_Krishnan-A__Pankaj_Singh-A_25	25_Vehicle	human cell line	0.0642306	0.0804167	-0.115579	-0.202314	-0.0955831	0.116304	-0.460803	-0.56845	-0.189626	0.453843	0.385495	0.217322	0.0108498	0.140938	0.399711	0.0684284	0.0631259	-0.0464581	-0.765837	0.127379	0.366011	0.0751023	-0.0775518	-0.194383	-0.436813	-0.420886	0.0600799	-0.562508	-0.00464868	-0.3181	-0.431269	0.0494156	0.0922794	-0.0867811	-0.240348	0.0376338	-0.14251	-0.0111536	0.0302969	-0.267915	-0.385333
86	Sunil Krishnan-A (Pankaj Singh-A)	18_Sunil_Krishnan-A__Pankaj_Singh-A			sample	Sunil_Krishnan-A__Pankaj_Singh-A_26	26_Vehicle	human cell line	0.101122	0.0828163	-0.12504	-0.222911	-0.167994	0.0240035	-0.381845	-0.493655	-0.232206	0.427853	0.400554	0.185074	-0.0010399	0.131344	0.462689	0.137822	0.066269	-0.0158607	-1.11687	0.0799565	0.330944	0.0920953	0.0107454	-0.17934	-0.202045	-0.440595	0.0570774	-0.495577	-0.0737375	-0.301608	-0.289117	0.100147	0.10317	0.0636749	-0.269573	0.0818029	-0.00560703	-0.0581581	-0.0496918	-0.241862	-0.376587
87	Sunil Krishnan-A (Pankaj Singh-A)	18_Sunil_Krishnan-A__Pankaj_Singh-A			sample	Sunil_Krishnan-A__Pankaj_Singh-A_27	27_Vehicle	human cell line	0.0413931	0.0931258	-0.185363	-0.260697	-0.083558	0.0658619	-0.405538	-0.526989	-0.165804	0.362887	0.372104	0.196687	-0.0256984	0.0881338	0.356913	0.141682	0.0530688	0.398342	-0.799719	0.0892918	0.331454	0.12579	0.0960629	-0.19351	-0.45205	-0.475096	0.0332377	-0.593785	-0.0986816	-0.31586	-0.285928	0.0843966	0.103844	0.0471899	-0.265847	0.0962376	-0.0470165	-0.0649612	-0.0208742	-0.230975	-0.373538
88	Sunil Krishnan-A (Pankaj Singh-A)	18_Sunil_Krishnan-A__Pankaj_Singh-A			sample	Sunil_Krishnan-A__Pankaj_Singh-A_28	28_Insulin (100 nM)	human cell line	0.0569757	0.106065	-0.167019	-0.277882	-0.209943	0.139941	-0.341636	-0.50701	-0.234716	0.359051	0.259227	0.139529	-0.0317576	0.0820371	0.339688	0.198671	0.0506991	0.0203247	-0.823969	0.14308	0.402712	0.0542385	0.0910978	-0.360836	-0.226456	-0.290149	0.0554691	-0.668576	-0.0326467	-0.359508	-0.249729	0.0397185	0.050462	0.0600815	-0.142319	0.0689348	-0.0252892	0.00114062	0.0138405	-0.257372	-0.429584
89	Sunil Krishnan-A (Pankaj Singh-A)	18_Sunil_Krishnan-A__Pankaj_Singh-A			sample	Sunil_Krishnan-A__Pankaj_Singh-A_29	29_Insulin (100 nM)	human cell line	0.0446471	0.0603418	-0.153901	-0.229487	-0.190013	0.141668	-0.35664	-0.543422	-0.160306	0.334731	0.353739	0.0399684	-0.0584044	0.123902	0.42995	0.177411	0.0840179	0.158459	-0.613373	0.0812477	0.388589	0.0847278	0.0401122	-0.191074	-0.265959	-0.316344	0.0169967	-0.667925	-0.126506	-0.340619	-0.291775	0.0730834	0.0991186	-0.00416261	-0.0951932	0.0606642	-0.0617065	-0.0329388	-0.0147972	-0.124915	-0.484955
90	Sunil Krishnan-A (Pankaj Singh-A)	18_Sunil_Krishnan-A__Pankaj_Singh-A			sample	Sunil_Krishnan-A__Pankaj_Singh-A_30	30_Insulin (100 nM)	human cell line	0.108359	0.05001	-0.163073	-0.286004	-0.120667	0.0805789	-0.397419	-0.499071	-0.200956	0.311539	0.414326	0.126867	-0.00563681	0.060761	0.470967	0.120421	0.056236	0.0485913	-0.843529	0.13615	0.392003	0.10265	0.0714654	-0.156957	-0.201701	-0.317986	0.0362691	-0.65999	-0.115347	-0.361149	-0.284427	0.127377	0.0628305	0.0110833	-0.335041	0.10462	-0.0473605	0.010927	-0.000139156	-0.158428	-0.476277
91	Sunil Krishnan-A (Pankaj Singh-A)	18_Sunil_Krishnan-A__Pankaj_Singh-A			sample	Sunil_Krishnan-A__Pankaj_Singh-A_31	31_Abeta 40 (1hr)	human cell line	0.108854	0.0507666	-0.0516903	-0.225224	-0.153535	0.046516	-0.432534	-0.793318	-0.117058	0.331015	0.598311	0.320664	-0.0246155	0.12545	0.596693	-0.0435775	0.090959	0.0668793	-0.879001	0.221999	0.314359	0.11226	-0.114405	-0.116041	-0.487432	-0.347916	0.0456869	-0.73559	-0.152897	-0.254167	-0.40121	0.132593	0.0109899	-0.0153497	-0.349338	0.150876	-0.130727	-0.063393	0.0364816	-0.273681	-0.409416
92	Sunil Krishnan-A (Pankaj Singh-A)	18_Sunil_Krishnan-A__Pankaj_Singh-A			sample	Sunil_Krishnan-A__Pankaj_Singh-A_32	32_Abeta 40 (1hr)	human cell line	0.0526972	0.0710096	0.0180477	-0.24659	-0.194271	0.152617	-0.332347	-0.529481	-0.118724	0.279946	0.631026	0.287909	-0.0331749	0.0990515	0.615426	0.123943	0.00517244	0.336846	-0.937069	0.119133	0.416896	0.104496	0.0865109	-0.205487	-0.252384	-0.247833	0.0128071	-0.676616	-0.0813901	-0.348828	-0.290394	0.12604	0.0498525	0.0472981	-0.15937	0.150075	-0.0535872	-0.11538	-0.0401095	-0.181265	-0.49973
93	Sunil Krishnan-A (Pankaj Singh-A)	18_Sunil_Krishnan-A__Pankaj_Singh-A			sample	Sunil_Krishnan-A__Pankaj_Singh-A_33	33_Abeta 40 (1hr)	human cell line	0.134357	0.00879272	-0.0215118	-0.269948	-0.123807	0.117088	-0.332358	-0.632005	-0.0889051	0.259568	0.660452	0.288637	-0.0366643	0.14473	0.586708	0.0872522	0.00943062	0.127096	-0.752228	0.100933	0.351168	0.0605296	0.12773	-0.239754	-0.500484	-0.368934	0.0583613	-0.61013	-0.0305337	-0.308658	-0.240435	0.105704	0.0691221	0.053573	-0.354783	0.0577278	-0.012891	-0.0479026	-0.0594032	-0.375977	-0.350261
94	Sunil Krishnan-A (Pankaj Singh-A)	18_Sunil_Krishnan-A__Pankaj_Singh-A			sample	Sunil_Krishnan-A__Pankaj_Singh-A_34	34_Abeta 40 + Insulin	human cell line	0.131698	-0.0217985	-0.0399121	-0.28711	-0.0641587	0.0810374	-0.372702	-0.520122	-0.0200473	0.285739	0.593907	0.246451	-0.0134931	0.136235	0.675298	0.120017	-0.00496405	0.28443	-0.864077	0.137745	0.397532	0.0945494	0.108192	-0.176004	-0.2964	-0.323189	0.030474	-0.460524	-0.0426305	-0.271606	-0.241091	0.142668	0.106946	0.0774268	-0.253253	0.121733	-0.0140652	0.00503954	-0.0235614	-0.312182	-0.317632
95	Sunil Krishnan-A (Pankaj Singh-A)	18_Sunil_Krishnan-A__Pankaj_Singh-A			sample	Sunil_Krishnan-A__Pankaj_Singh-A_35	35_Abeta 40 + Insulin	human cell line	0.0853456	-0.121937	-0.114369	-0.309254	-0.0944595	0.0373132	-0.328841	-0.465051	0.0468821	0.474193	0.106906	0.244594	-0.0461359	0.157706	0.885572	0.0683873	-0.0609208	0.26006	-0.898039	0.0491246	0.386987	0.20899	0.0327923	-0.25015	-0.329055	-0.254679	0.0128931	-0.468488	-0.0673256	-0.311295	-0.310953	0.0601057	0.141539	0.0693167	-0.413845	0.0983903	-0.0709986	0.0284036	-0.0834374	-0.229903	-0.33253
96	Sunil Krishnan-A (Pankaj Singh-A)	18_Sunil_Krishnan-A__Pankaj_Singh-A			sample	Sunil_Krishnan-A__Pankaj_Singh-A_36	36_Abeta 40 + Insulin	human cell line	0.224183	-0.165761	-0.120918	-0.263607	-0.0550103	0.132135	-0.392012	-0.51297	0.116625	0.400652	0.672324	0.242588	-0.050894	0.134072	0.693456	0.0194812	-0.0281297	0.213559	-0.464266	0.0323099	0.353637	0.148686	0.0750329	-0.206335	-0.566289	-0.331504	-0.031489	-0.455982	-0.104859	-0.360727	-0.280387	-0.0281363	0.196851	0.0658227	-0.168309	0.0878308	-0.147195	-0.0170171	-0.0447312	-0.143305	-0.246065
109	Sunil Krishnan-A (Pankaj Singh-A)	18_Sunil_Krishnan-A__Pankaj_Singh-A			sample	Sunil_Krishnan-A__Pankaj_Singh-A_37	37_Abeta 42 (1hr)	human cell line	-0.00426412	0.126298	-0.179856	-0.220696	-0.111997	0.0954962	-0.378011	-0.571153	-0.151877	0.406836	0.116342	0.187679	-0.00315007	0.0974126	0.251953	0.18184	0.129343	-0.12136	-0.854657	0.153393	0.382038	0.0416672	-0.164079	-0.128706	-0.484343	-0.362957	0.123577	-0.741325	-0.013976	-0.371229	-0.479758	0.124484	-0.106839	0.110715	-0.289305	0.0917575	0.124026	-0.0701141	0.0223126	-0.326602	-0.325577
110	Sunil Krishnan-A (Pankaj Singh-A)	18_Sunil_Krishnan-A__Pankaj_Singh-A			sample	Sunil_Krishnan-A__Pankaj_Singh-A_38	38_Abeta 42 (1hr)	human cell line	0.0577515	0.0788612	-0.219614	-0.260388	-0.209978	0.0686928	-0.397156	-0.426286	-0.190327	0.295341	0.138944	0.0889305	-0.0306763	0.0881184	0.278662	0.147898	0.0801393	0.159476	-1.03949	0.0755284	0.377651	0.0157261	0.0907008	-0.148464	-0.211241	-0.390946	0.0666166	-0.611832	-0.0421765	-0.374122	-0.273544	0.123996	0.0243771	0.0416809	-0.112221	-0.0185476	-0.0393247	-0.164287	-0.0542801	-0.384051	-0.502851
111	Sunil Krishnan-A (Pankaj Singh-A)	18_Sunil_Krishnan-A__Pankaj_Singh-A			sample	Sunil_Krishnan-A__Pankaj_Singh-A_39	39_Abeta 42 (1hr)	human cell line	0.0297809	0.100367	-0.0957695	-0.262941	-0.159278	0.102998	-0.341892	-0.467988	-0.138347	0.39346	0.205067	0.117014	-0.0489209	0.0868088	0.434554	0.148648	0.121722	0.384193	-1.07284	0.0670004	0.327365	0.106091	0.0314201	-0.232921	-0.242573	-0.325543	0.0657638	-0.604427	-0.105583	-0.376825	-0.31828	0.10339	0.0649212	0.0330607	-0.191898	0.0887269	-0.0498793	-0.0693426	-0.0311711	-0.318646	-0.470298
112	Sunil Krishnan-A (Pankaj Singh-A)	18_Sunil_Krishnan-A__Pankaj_Singh-A			sample	Sunil_Krishnan-A__Pankaj_Singh-A_40	40_Abeta 42 + Insulin	human cell line	0.072899	0.106643	-0.224626	-0.252373	-0.153649	-0.0013571	-0.428161	-0.517495	-0.167403	0.350732	0.154598	0.0927075	0.00947005	0.0560929	0.404568	0.14002	0.0116609	0.0911142	-0.623753	0.0851364	0.280603	0.0441798	0.153935	-0.127509	-0.198814	-0.372969	0.0696701	-0.65664	-0.115692	-0.414294	-0.267131	0.132592	-0.0268873	0.0884468	-0.112443	-0.0172812	-0.0210615	-0.026982	0.0921391	-0.332472	-0.512515
113	Sunil Krishnan-A (Pankaj Singh-A)	18_Sunil_Krishnan-A__Pankaj_Singh-A			sample	Sunil_Krishnan-A__Pankaj_Singh-A_41	41_Abeta 42 + Insulin	human cell line	-0.00550105	0.0660105	-0.112848	-0.222644	-0.125502	0.0353163	-0.420542	-0.257926	-0.137641	0.338367	0.110797	0.0074291	-0.0570964	0.135671	0.521645	0.0852161	0.0675313	0.304481	-0.496491	0.0346768	0.298732	0.122034	0.0360838	-0.152474	-0.294945	-0.332443	0.0443902	-0.619519	-0.0532214	-0.387521	-0.33694	0.0630371	0.110571	-0.0231625	-0.170357	0.0256439	-0.0808825	-0.0119079	-0.0500622	-0.169216	-0.345964
114	Sunil Krishnan-A (Pankaj Singh-A)	18_Sunil_Krishnan-A__Pankaj_Singh-A			sample	Sunil_Krishnan-A__Pankaj_Singh-A_42	42_Abeta 42 + Insulin	human cell line	0.0194484	-0.0113006	-0.132198	-0.243255	-0.107605	0.0264223	-0.46258	-0.362602	-0.207247	0.255395	0.165999	0.0479172	0.0441253	0.0796764	0.49724	0.100488	0.0629029	0.175177	-0.570692	0.0629812	0.321061	0.124312	0.0913683	-0.158131	-0.389833	-0.386992	0.0358501	-0.639161	-0.138225	-0.374772	-0.324079	0.113342	0.141134	0.0404328	-0.177868	0.00518295	-0.0758081	-0.0854718	-0.0526522	-0.209157	-0.43197
[truncated: 265 more columns]

## Sheet: NormLog2_MedianCentered
								Antibody Name	14-3-3-beta	14-3-3-zeta	4E-BP1	4E-BP1_pS65	53BP1	A-Raf	ACC1	ACC_pS79	ADAR1	Akt	Akt_pS473	Akt_pT308	AMPK-a2_pS345	AMPKa	AMPKa_pT172	Annexin-I	Annexin-VII	AR	ARID1A	Atg3	Atg7	ATM	ATM_pS1981	ATR_pS428	Aurora-B	Axl	b-Actin	b-Catenin	b-Catenin_pT41_S45	B-Raf	B-Raf_pS445	B7-H4	Bad_pS112	Bak	BAP1	Bax	Bcl-xL	Bcl2	Beclin	Bid	Bim
								Antibody Origin	R	R	R	R	R	R	R	R	M	R	R	R	R	R	R	M	M	R	R	R	R	R	R	R	R	R	R	R	R	R	R	R	R	R	M	R	R	M	R	R	R
								Gene Name	YWHAB	YWHAZ	EIF4EBP1	EIF4EBP1	TP53BP1	ARAF	ACACA/ ACACB	ACACA/ACACB	ADAR	AKT1/2/3	AKT1/2/3	AKT1/2/3	PRKAA2	PRKAA1/2	PRKAA1/2	ANXA1	ANXA7	AR	ARID1A	ATG3	ATG7	ATM	ATM	ATR	AURKB	AXL	ACTB	CTNNB1	CTNNB1	BRAF	BRAF	VTCN1	BAD	BAK1	BAP1	BAX	BCL2L1	BCL2	BECN1	BID	BCL2L11
								Validation Status	V	V	V	V	V	V	C	V	V	V	V	V	V	C	C	V	V	V	C	V	V	V	V	C	V	V	C	V	V	C	V	C	V	C	V	V	V	V	C	C	V
								Slide Id	GBL1144582	GBL1144583	GBL1144348	GBL1144349	GBL1144437	GBL1144487	GBL1144351	GBL1144350	GBL1144609	GBL1144660	GBL1144374	GBL1144474	GBL1144504	GBL1144352	GBL1144353	GBL1144612	GBL1144608	GBL1144565	GBL1144515	GBL1144523	GBL1144524	GBL1144506	GBL1144507	GBL1144546	GBL1144512	GBL1144497	GBL1144480	GBL1144357	GBL1144481	GBL1144559	GBL1144361	GBL1144541	GBL1144354	GBL1144355	GBL1144636	GBL1144356	GBL1144358	GBL1144624	GBL1144591	GBL1144359	GBL1144360
								Antibody Name in Heatmap	14-3-3-beta-R-V	14-3-3-zeta-R-V	4E-BP1-R-V	4E-BP1_pS65-R-V	53BP1-R-V	A-Raf-R-V	ACC1-R-C	ACC_pS79-R-V	ADAR1-M-V	Akt-R-V	Akt_pS473-R-V	Akt_pT308-R-V	AMPK-a2_pS345-R-V	AMPKa-R-C	AMPKa_pT172-R-C	Annexin-I-M-V	Annexin-VII-M-V	AR-R-V	ARID1A-R-C	Atg3-R-V	Atg7-R-V	ATM-R-V	ATM_pS1981-R-V	ATR_pS428-R-C	Aurora-B-R-V	Axl-R-V	b-Actin-R-C	b-Catenin-R-V	b-Catenin_pT41_S45-R-V	B-Raf-R-C	B-Raf_pS445-R-V	B7-H4-R-C	Bad_pS112-R-V	Bak-R-C	BAP1-M-V	Bax-R-V	Bcl-xL-R-V	Bcl2-M-V	Beclin-R-C	Bid-R-C	Bim-R-V
								Probabilities (QC Score)	0.928356	0.860142	0.951039	0.950514	0.952341	0.955901	0.955105	0.958116	0.916469	0.853838	0.95127	0.956545	0.862934	0.954887	0.967568	0.902441	0.92124	0.938634	0.966211	0.943151	0.966335	0.959059	0.884195	0.940566	0.933574	0.942243	0.875996	0.950027	0.933985	0.958581	0.958016	0.914757	0.935648	0.909787	0.918703	0.883895	0.917508	0.85358	0.889353	0.889503	0.887597
								Slide no.	1	2	3	4	5	6	7	8	9	10	11	12	13	14	15	16	17	18	19	20	21	22	23	24	25	26	27	28	29	30	31	32	33	34	35	36	37	38	39	40	41
Order	Sample Source	Category_1	Category_2	Category_3	Sample	Sample Name	Sample description	Sample Type	14-3-3-beta-R-V	14-3-3-zeta-R-V	4E-BP1-R-V	4E-BP1_pS65-R-V	53BP1-R-V	A-Raf-R-V	ACC1-R-C	ACC_pS79-R-V	ADAR1-M-V	Akt-R-V	Akt_pS473-R-V	Akt_pT308-R-V	AMPK-a2_pS345-R-V	AMPKa-R-C	AMPKa_pT172-R-C	Annexin-I-M-V	Annexin-VII-M-V	AR-R-V	ARID1A-R-C	Atg3-R-V	Atg7-R-V	ATM-R-V	ATM_pS1981-R-V	ATR_pS428-R-C	Aurora-B-R-V	Axl-R-V	b-Actin-R-C	b-Catenin-R-V	b-Catenin_pT41_S45-R-V	B-Raf-R-C	B-Raf_pS445-R-V	B7-H4-R-C	Bad_pS112-R-V	Bak-R-C	BAP1-M-V	Bax-R-V	Bcl-xL-R-V	Bcl2-M-V	Beclin-R-C	Bid-R-C	Bim-R-V
									Median-Centered	Median-Centered	Median-Centered	Median-Centered	Median-Centered	Median-Centered	Median-Centered	Median-Centered	Median-Centered	Median-Centered	Median-Centered	Median-Centered	Median-Centered	Median-Centered	Median-Centered	Median-Centered	Median-Centered	Median-Centered	Median-Centered	Median-Centered	Median-Centered	Median-Centered	Median-Centered	Median-Centered	Median-Centered	Median-Centered	Median-Centered	Median-Centered	Median-Centered	Median-Centered	Median-Centered	Median-Centered	Median-Centered	Median-Centered	Median-Centered	Median-Centered	Median-Centered	Median-Centered	Median-Centered	Median-Centered	Median-Centered
37	Sunil Krishnan-A (Pankaj Singh-A)	18_Sunil_Krishnan-A__Pankaj_Singh-A			sample	Sunil_Krishnan-A__Pankaj_Singh-A_1	1_untreated	human cell line	-0.113174	-0.0218868	0.0543158	0.186462	0.0371645	-0.0922144	0.297953	0.305305	0.0448519	-0.444616	0.277055	-0.0114689	9.41372e-06	-0.0736467	-0.735465	-0.276657	-0.0749841	0.00191576	0.480685	-0.0611662	-0.303905	-0.0983788	-0.0136075	0.18521	0.30254	0.112985	-0.0863491	0.331226	-0.00508664	0.228488	0.142433	-0.000603423	-0.003115	0.0208348	0.110136	-0.0484031	-0.02976	0.115139	-0.00280696	0.20341	0.247253
38	Sunil Krishnan-A (Pankaj Singh-A)	18_Sunil_Krishnan-A__Pankaj_Singh-A			sample	Sunil_Krishnan-A__Pankaj_Singh-A_2	2_untreated	human cell line	-0.130636	-0.0399695	-0.000981522	0.187095	0.0706949	-0.0958141	0.275904	0.365362	0.0546982	-0.377672	0.207544	0.0305417	-0.03284	-0.106014	-0.678412	-0.196979	-0.0665322	-0.00191576	0.622439	0.039445	-0.265737	-0.100613	-0.031649	0.109882	0.311585	0.179554	-0.126616	0.382106	-0.00942576	0.26132	0.175053	0.000603423	0.100837	-0.00460022	0.0927249	-0.14441	0.00677736	0.075069	-0.0490785	0.191976	0.24901
39	Sunil Krishnan-A (Pankaj Singh-A)	18_Sunil_Krishnan-A__Pankaj_Singh-A			sample	Sunil_Krishnan-A__Pankaj_Singh-A_3	3_untreated	human cell line	-0.101004	0.0110801	0.0975616	0.173699	0.109642	-0.0839226	0.369307	0.309482	0.0523321	-0.341368	0.349423	-0.0391562	-0.013082	-0.116748	-0.621569	-0.0721717	0.0198921	-0.133412	0.461751	0.0519445	-0.282166	-0.0372014	-0.0596174	0.207037	0.24136	0.321342	-0.0345155	0.376314	0.0283383	0.253406	0.237588	-0.0728427	-0.0118257	0.0126407	0.157191	-0.0108736	0.0572664	0.0641626	0.0428933	0.237443	0.274677
40	Sunil Krishnan-A (Pankaj Singh-A)	18_Sunil_Krishnan-A__Pankaj_Singh-A			sample	Sunil_Krishnan-A__Pankaj_Singh-A_4	4_Vehicle	human cell line	-0.100298	0.0412067	0.103373	0.242882	0.0724313	-0.112171	0.343789	0.326015	-0.162511	-0.320807	0.0371658	-0.0426211	-0.0159208	-0.0550472	-0.762762	-0.0687432	-0.0143403	-0.178976	0.673417	0.0301856	-0.284426	-0.129726	-0.0779252	0.146986	0.227954	0.387855	-0.0220805	0.477161	0.0155337	0.265016	0.242623	-0.0743153	-0.014797	-0.0318041	0.133947	-0.00902563	0.0690019	0.0882468	0.0420992	0.252282	0.246385
41	Sunil Krishnan-A (Pankaj Singh-A)	18_Sunil_Krishnan-A__Pankaj_Singh-A			sample	Sunil_Krishnan-A__Pankaj_Singh-A_5	5_Vehicle	human cell line	-0.141224	-0.00248338	0.0091188	0.213547	0.142213	-0.13235	0.260051	0.235544	0.113827	-0.380793	-0.213606	-0.0957099	-0.0193763	-0.028991	-0.672884	-0.0322733	0.0513995	-0.245896	0.466575	-0.0184577	-0.30657	-0.100909	-0.0629139	0.150651	0.240069	0.358969	-0.0550638	0.370827	0.113644	0.218213	0.262409	-0.0224366	0.0122505	-0.00372007	0.195469	-0.0170889	0.0108499	8.39308e-05	-0.00161764	0.156995	0.207646
42	Sunil Krishnan-A (Pankaj Singh-A)	18_Sunil_Krishnan-A__Pankaj_Singh-A			sample	Sunil_Krishnan-A__Pankaj_Singh-A_6	6_Vehicle	human cell line	-0.105276	-0.0406261	0.064997	0.189965	0.127021	-0.144725	0.453193	0.284145	0.171545	-0.345102	-0.0152256	-0.0717985	-9.41372e-06	-0.0267479	-0.683636	-0.0822992	0.031145	-0.110205	0.522383	0.0726199	-0.234827	-0.0843701	-0.0799727	0.144292	0.203446	0.294808	-0.0259778	0.423834	0.0458761	0.30786	0.251686	-0.0393379	0.0137963	-0.0238168	0.164983	-0.0977652	0.024381	0.0427652	-0.0275427	0.234993	0.243512
43	Sunil Krishnan-A (Pankaj Singh-A)	18_Sunil_Krishnan-A__Pankaj_Singh-A			sample	Sunil_Krishnan-A__Pankaj_Singh-A_7	7_Insulin (100 nM)	human cell line	-0.0740559	0.000246579	0.14643	0.290983	0.0813259	-0.0487371	0.399095	0.361647	0.0267079	-0.402079	-0.800837	-0.277246	0.0172047	-0.123701	-0.433619	-0.0278722	-0.00688917	-0.0294863	0.58432	0.134355	-0.305873	-0.0879556	-0.0279275	0.152342	0.210788	0.298611	-0.0168486	0.455302	0.0385391	0.280287	0.311776	-0.0695042	-0.147673	0.0166149	0.163066	0.00418994	0.0950356	-0.041341	0.00136775	0.251461	0.274263
44	Sunil Krishnan-A (Pankaj Singh-A)	18_Sunil_Krishnan-A__Pankaj_Singh-A			sample	Sunil_Krishnan-A__Pankaj_Singh-A_8	8_Insulin (100 nM)	human cell line	-0.0662535	0.0151154	0.12369	0.259869	0.0694052	-0.0229174	0.286926	0.301374	0.0457309	-0.432428	-0.862639	-0.16758	-0.00159526	-0.0964513	-0.389058	-0.0869025	-0.0439235	-0.0161194	0.320403	0.0653342	-0.278258	-0.118357	-0.0337482	0.122129	0.177746	0.28853	-0.0184333	0.44562	0.0441572	0.330342	0.269795	-0.0595119	-0.172941	-0.0192267	0.136027	-0.00485759	0.111531	0.0160173	0.00696065	0.263872	0.302818
45	Sunil Krishnan-A (Pankaj Singh-A)	18_Sunil_Krishnan-A__Pankaj_Singh-A			sample	Sunil_Krishnan-A__Pankaj_Singh-A_9	9_Insulin (100 nM)	human cell line	-0.0267914	-0.0879832	0.185601	0.314707	0.0784408	-0.000638637	0.41738	0.389824	0.0913806	-0.459135	-0.671987	-0.157216	-0.0164253	-0.0412789	-0.36724	-0.123803	-0.0847813	0.0305851	0.531226	-0.00504528	-0.277902	-0.10823	-0.0200926	0.12617	0.189932	0.297749	-0.0538839	0.555751	0.0553575	0.267271	0.347474	-0.00716601	-0.142939	-0.00580242	0.121991	-0.0343557	0.0616525	0.100514	-0.00744238	0.241969	0.340241
46	Sunil Krishnan-A (Pankaj Singh-A)	18_Sunil_Krishnan-A__Pankaj_Singh-A			sample	Sunil_Krishnan-A__Pankaj_Singh-A_10	10_Abeta 40 (1hr)	human cell line	-0.016612	-0.0866369	0.139562	0.283435	0.0854367	-0.0659675	0.384324	0.540919	0.0561104	-0.362116	-0.133465	-0.171234	0.0498071	-0.0964072	0.00536224	-0.0355937	-0.0726571	-0.119288	0.743321	-0.0774181	-0.372755	-0.0922804	-0.00217788	0.102708	0.18912	0.446318	-0.0234072	0.555698	0.0531261	0.293001	0.370357	-0.109632	-0.136451	-0.052075	0.156334	0.00325017	0.142051	-0.0217093	0.0533214	0.184478	0.324056
47	Sunil Krishnan-A (Pankaj Singh-A)	18_Sunil_Krishnan-A__Pankaj_Singh-A			sample	Sunil_Krishnan-A__Pankaj_Singh-A_11	11_Abeta 40 (1hr)	human cell line	-0.125351	-0.095181	0.0701615	0.253051	0.114672	0.000638637	0.400142	0.643523	0.260721	-0.323321	-0.141355	-0.137782	0.0286125	-0.0655072	-0.00829075	-0.055111	-0.0283653	-0.217072	0.654318	-0.147822	-0.260439	-0.0258958	0.00927698	0.116827	0.205619	0.453987	0.0028793	0.646041	0.0718056	0.275175	0.35042	-0.168105	-0.106989	-0.0170848	0.136147	-0.0112863	0.139093	0.0515993	0.00835644	0.131639	0.339536
48	Sunil Krishnan-A (Pankaj Singh-A)	18_Sunil_Krishnan-A__Pankaj_Singh-A			sample	Sunil_Krishnan-A__Pankaj_Singh-A_12	12_Abeta 40 (1hr)	human cell line	-0.0712146	-0.0724183	0.135782	0.253587	0.152114	-0.0460622	0.641322	0.588437	0.353154	-0.146065	0.0764744	-0.135938	0.00390389	-0.0718616	-0.0310671	0.00446448	-0.0650708	-0.0927817	0.866172	-0.1101	-0.368788	-0.0540942	-0.0249001	0.0912504	0.219461	0.637906	-0.0418936	0.778276	0.0143718	0.308747	0.341076	-0.181016	-0.102247	0.0311323	0.114219	-0.0645586	0.125846	0.130752	0.0434858	0.226115	0.283301
61	Sunil Krishnan-A (Pankaj Singh-A)	18_Sunil_Krishnan-A__Pankaj_Singh-A			sample	Sunil_Krishnan-A__Pankaj_Singh-A_13	13_Abeta 40 + Insulin	human cell line	-0.0423758	-0.0319934	0.0961112	0.232462	0.137968	-0.0861214	0.430737	0.490903	0.0714454	-0.300824	-0.213369	-0.171055	0.0234028	-0.164176	-0.231843	-0.0185947	-0.0771434	-0.2361	0.709001	-0.195703	-0.376069	-0.120717	-0.0211898	0.176112	0.18034	0.365105	0.0258774	0.52329	0.00381185	0.246197	0.272012	-0.0784743	-0.199484	-0.00256327	0.129295	-0.0766275	0.0411982	-0.0275286	0.0392366	0.102195	0.226201
62	Sunil Krishnan-A (Pankaj Singh-A)	18_Sunil_Krishnan-A__Pankaj_Singh-A			sample	Sunil_Krishnan-A__Pankaj_Singh-A_14	14_Abeta 40 + Insulin	human cell line	-0.0419919	-0.0373644	0.02283	0.156601	0.00709849	-0.0940363	0.349933	0.539095	-0.0224019	-0.295708	-0.283494	-0.161441	0.0277065	-0.128503	-0.240948	-0.0248157	-0.0372574	-0.190395	0.640609	-0.0943065	-0.385226	-0.117207	0.0131753	0.110407	0.199905	0.396897	-0.029766	0.421799	0.00142288	0.228715	0.241743	-0.0385266	-0.142471	-0.0329042	0.126596	-0.107673	0.000366963	0.0270617	0.0675262	0.0966088	0.26057
63	Sunil Krishnan-A (Pankaj Singh-A)	18_Sunil_Krishnan-A__Pankaj_Singh-A			sample	Sunil_Krishnan-A__Pankaj_Singh-A_15	15_Abeta 40 + Insulin	human cell line	-0.0714502	0.0290966	0.0982125	0.206055	0.114644	-0.0945014	0.584211	0.600349	0.165083	-0.164386	-0.180219	-0.170214	-0.00532433	-0.160268	-0.119582	-0.0286471	-0.0894704	0.0595791	0.756075	-0.0763942	-0.326325	-0.137961	-0.0134926	0.122179	0.174231	0.47705	-0.0751431	0.562469	-0.00142288	0.305469	0.265667	-0.0909189	-0.177612	-0.0512863	0.133618	-0.0584045	0.0206562	0.0439353	-0.00136775	0.20042	0.248724
64	Sunil Krishnan-A (Pankaj Singh-A)	18_Sunil_Krishnan-A__Pankaj_Singh-A			sample	Sunil_Krishnan-A__Pankaj_Singh-A_16	16_Abeta 42 (1hr)	human cell line	-0.0724077	0.0222219	0.0138865	0.163509	0.057142	-0.0837631	0.347039	0.2577	0.000503805	-0.342954	-0.379357	-0.0877174	0.00890167	-0.115048	-0.969384	-0.0377668	-0.0443357	-0.0470191	0.587345	-0.0245424	-0.339628	-0.115081	0.0392586	0.195135	0.206499	0.346179	-0.0465973	0.456257	0.0463713	0.295716	0.253658	-0.0909762	-0.10316	0.00120685	0.153638	-0.0319403	0.040719	0.0762707	0.076406	0.170419	0.278092
65	Sunil Krishnan-A (Pankaj Singh-A)	18_Sunil_Krishnan-A__Pankaj_Singh-A			sample	Sunil_Krishnan-A__Pankaj_Singh-A_17	17_Abeta 42 (1hr)	human cell line	-0.0902864	-0.0101247	0.079868	0.212237	0.12481	-0.0565364	0.434016	0.218105	0.105314	-0.296427	-0.421326	-0.112708	0.0303758	-0.101785	-0.884906	-0.147185	-0.00593141	-0.0697588	0.813266	-0.0574922	-0.330249	-0.0772255	-0.0520386	0.168846	0.207322	0.43234	-0.0568005	0.513083	0.0670313	0.331234	0.277486	-0.0718535	-0.0599755	-0.0667305	0.14515	-0.0622934	0.0655046	-8.39308e-05	0.0879729	0.185166	0.237067
66	Sunil Krishnan-A (Pankaj Singh-A)	18_Sunil_Krishnan-A__Pankaj_Singh-A			sample	Sunil_Krishnan-A__Pankaj_Singh-A_18	18_Abeta 42 (1hr)	human cell line	-0.114765	-0.0208368	0.000981522	0.156999	0.0410097	-0.0820982	0.388152	0.309019	0.0726926	-0.408965	-0.355578	-0.088709	0.0274745	-0.0960745	-0.917056	-0.192805	-0.0602461	-0.051092	0.663654	0.0119626	-0.347765	-0.130426	-0.0416828	0.121279	0.216202	0.27453	-0.0777526	0.360624	0.0324581	0.303874	0.179064	0.00701541	-0.022544	-0.0322422	0.120363	-0.143417	0.0115386	0.0639635	0.0562638	0.15713	0.2453
67	Sunil Krishnan-A (Pankaj Singh-A)	18_Sunil_Krishnan-A__Pankaj_Singh-A			sample	Sunil_Krishnan-A__Pankaj_Singh-A_19	19_Abeta 42 + Insulin	human cell line	-0.0494252	-0.000246579	0.135699	0.161699	0.0991436	-0.0328478	0.45699	0.206992	0.0924068	-0.451405	-0.405388	-0.204333	0.0344985	-0.184544	-0.962365	-0.00209989	-0.0451431	-0.0441137	0.712172	0.0466559	-0.33606	-0.0965917	-0.0165892	0.169859	0.253715	0.334276	-0.0145897	0.539382	0.0257098	0.258151	0.295946	-0.0559232	-0.121165	0.00409643	0.0892233	-0.000578792	0.112752	0.100732	0.0640109	0.219526	0.353329
68	Sunil Krishnan-A (Pankaj Singh-A)	18_Sunil_Krishnan-A__Pankaj_Singh-A			sample	Sunil_Krishnan-A__Pankaj_Singh-A_20	20_Abeta 42 + Insulin	human cell line	-0.00714256	0.0207316	0.140811	0.18973	0.0446516	-0.0296228	0.405595	0.187951	0.0675832	-0.457982	-0.456435	-0.140185	0.0248633	-0.121129	-0.873428	-0.0969802	-0.0288739	-0.0688934	0.668007	0.00714216	-0.302407	-0.124824	-0.033529	0.148341	0.225637	0.331262	-0.0364753	0.464969	0.0604237	0.26608	0.255317	-0.0314251	-0.124825	-0.00138627	0.123764	-0.0453662	0.0938073	0.0611728	0.073911	0.200665	0.278176
69	Sunil Krishnan-A (Pankaj Singh-A)	18_Sunil_Krishnan-A__Pankaj_Singh-A			sample	Sunil_Krishnan-A__Pankaj_Singh-A_21	21_Abeta 42 + Insulin	human cell line	0.0279423	-0.0471049	0.136024	0.23479	0.0647955	-0.0163802	0.488892	0.257819	0.102246	-0.383161	-0.436614	-0.159945	0.020335	-0.136126	-0.846947	-0.0391978	-0.0762232	-0.217718	0.784897	-0.0820253	-0.336957	-0.082333	0.0113928	0.117356	0.266492	0.32232	-0.0803681	0.568502	0.0633922	0.255249	0.338839	-0.0794475	-0.0828613	-0.0238444	0.114331	-0.0590672	0.0807371	0.068609	0.0676584	0.11764	0.273181
70	Sunil Krishnan-A (Pankaj Singh-A)	18_Sunil_Krishnan-A__Pankaj_Singh-A			sample	Sunil_Krishnan-A__Pankaj_Singh-A_22	22_untreated	human cell line	0.0652637	-0.0573359	-0.150137	-0.190585	-0.0675206	0.0190321	-0.380107	-0.407922	-0.128864	0.193069	0.21524	0.156363	-0.000225597	0.103487	0.0523211	0.00209989	-0.0476251	0.210287	-0.320784	0.0311554	0.264691	0.0258958	0.20405	-0.1484	-0.174405	-0.320788	0.071663	-0.406099	-0.0224611	-0.25342	-0.190136	0.0727152	0.0892081	0.0343901	-0.371122	0.073878	-0.0350807	-0.102944	-0.018942	-0.223376	-0.26369
71	Sunil Krishnan-A (Pankaj Singh-A)	18_Sunil_Krishnan-A__Pankaj_Singh-A			sample	Sunil_Krishnan-A__Pankaj_Singh-A_23	23_untreated	human cell line	0.0484606	-0.217682	-0.209356	-0.169752	-0.0627503	0.0666844	-0.268588	-0.530306	-0.00344013	0.462617	0.248788	0.21033	0.00899904	0.107583	0.156303	0.113632	0.0248358	-0.0535265	-0.463976	0.0582185	0.319677	0.173433	0.00217788	-0.112726	-0.424288	-0.229987	0.122637	-0.331226	0.0316902	-0.281482	-0.313399	0.0572881	0.0803179	-0.0244123	-0.399926	0.0299739	-0.151612	0.00841479	-0.38719	-0.27183	-0.253894
72	Sunil Krishnan-A (Pankaj Singh-A)	18_Sunil_Krishnan-A__Pankaj_Singh-A			sample	Sunil_Krishnan-A__Pankaj_Singh-A_24	24_untreated	human cell line	0.031241	-0.201471	-0.238466	-0.1928	-0.00709849	0.094112	-0.417634	-0.541773	0.0473527	0.195223	0.227856	0.180874	-0.00313437	0.119853	0.130789	0.0383213	0.0639093	-0.00360565	-0.49463	-0.0131766	0.287467	0.152852	-0.00788711	-0.110334	-0.432212	-0.251428	0.0940717	-0.362648	-0.0754032	-0.275939	-0.310942	0.0301281	0.15223	0.0864734	-0.359524	0.000578792	-0.24335	0.0120106	-0.345693	-0.27791	-0.262708
85	Sunil Krishnan-A (Pankaj Singh-A)	18_Sunil_Krishnan-A__Pankaj_Singh-A			sample	Sunil_Krishnan-A__Pankaj_Singh-A_25	25_Vehicle	human cell line	0.0691132	0.0800978	-0.12101	-0.156601	-0.0911819	0.0938426	-0.392012	-0.498475	-0.237012	0.344513	0.225197	0.188823	0.0300759	0.111593	0.142395	0.0927456	0.0740214	0.0320113	-0.621975	0.0441872	0.320235	0.144818	-0.0561574	-0.169592	-0.41223	-0.286038	0.0472297	-0.449064	0.0187036	-0.282146	-0.333267	0.00728692	0.0710173	-0.0990712	-0.234378	0.0415043	-0.137269	-0.0183647	0.0368015	-0.239608	-0.346914
86	Sunil Krishnan-A (Pankaj Singh-A)	18_Sunil_Krishnan-A__Pankaj_Singh-A			sample	Sunil_Krishnan-A__Pankaj_Singh-A_26	26_Vehicle	human cell line	0.106005	0.0824973	-0.130472	-0.177198	-0.163593	0.00154225	-0.313055	-0.42368	-0.279592	0.318523	0.240255	0.156574	0.0181862	0.101999	0.205374	0.16214	0.0771644	0.0626087	-0.973009	-0.00323559	0.285168	0.161811	0.0321398	-0.154549	-0.177462	-0.305747	0.0442272	-0.382133	-0.0503852	-0.265654	-0.191116	0.0580186	0.0819079	0.0513848	-0.263603	0.0856734	-0.000366963	-0.0653692	-0.0431872	-0.213555	-0.338169
87	Sunil Krishnan-A (Pankaj Singh-A)	18_Sunil_Krishnan-A__Pankaj_Singh-A			sample	Sunil_Krishnan-A__Pankaj_Singh-A_27	27_Vehicle	human cell line	0.0462757	0.0928068	-0.190794	-0.214984	-0.0791568	0.0434007	-0.336748	-0.457014	-0.21319	0.253557	0.211805	0.168188	-0.00647235	0.0587888	0.0995973	0.165999	0.0639643	0.476812	-0.655856	0.00609966	0.285679	0.195506	0.117457	-0.168719	-0.427466	-0.340248	0.0203876	-0.480341	-0.0753293	-0.279906	-0.187927	0.0422679	0.0825818	0.0348998	-0.259877	0.100108	-0.0417764	-0.0721723	-0.0143696	-0.202669	-0.33512
88	Sunil Krishnan-A (Pankaj Singh-A)	18_Sunil_Krishnan-A__Pankaj_Singh-A			sample	Sunil_Krishnan-A__Pankaj_Singh-A_28	28_Insulin (100 nM)	human cell line	0.0618583	0.105746	-0.17245	-0.232169	-0.205542	0.11748	-0.272846	-0.437036	-0.282102	0.249721	0.0989288	0.111029	-0.0125315	0.0526921	0.0823724	0.222988	0.0615945	0.0987941	-0.680106	0.0598879	0.356936	0.123954	0.112492	-0.336045	-0.201872	-0.155301	0.0426189	-0.555132	-0.0092944	-0.323554	-0.151728	-0.00241014	0.0291999	0.0477914	-0.136349	0.0728053	-0.0200491	-0.00607046	0.0203451	-0.229065	-0.391166
89	Sunil Krishnan-A (Pankaj Singh-A)	18_Sunil_Krishnan-A__Pankaj_Singh-A			sample	Sunil_Krishnan-A__Pankaj_Singh-A_29	29_Insulin (100 nM)	human cell line	0.0495297	0.0600228	-0.159333	-0.183774	-0.185612	0.119207	-0.287849	-0.473447	-0.207692	0.225401	0.193441	0.0114689	-0.0391784	0.0945575	0.172634	0.201729	0.0949134	0.236928	-0.46951	-0.00194436	0.342813	0.154444	0.0615066	-0.166283	-0.241376	-0.181496	0.00414653	-0.554482	-0.103153	-0.304665	-0.193774	0.0309548	0.0778565	-0.0164527	-0.0892233	0.0645347	-0.0564664	-0.0401498	-0.00829254	-0.0966088	-0.446536
90	Sunil Krishnan-A (Pankaj Singh-A)	18_Sunil_Krishnan-A__Pankaj_Singh-A			sample	Sunil_Krishnan-A__Pankaj_Singh-A_30	30_Insulin (100 nM)	human cell line	0.113241	0.0496911	-0.168504	-0.240291	-0.116266	0.0581176	-0.328628	-0.429097	-0.248342	0.202209	0.254027	0.0983676	0.0135893	0.031416	0.213652	0.144739	0.0671315	0.127061	-0.699666	0.0529578	0.346227	0.172366	0.0928597	-0.132166	-0.177118	-0.183138	0.0234189	-0.546546	-0.0919949	-0.325195	-0.186426	0.0852483	0.0415684	-0.00120685	-0.329071	0.108491	-0.0421205	0.00371588	0.00636547	-0.130121	-0.437859
91	Sunil Krishnan-A (Pankaj Singh-A)	18_Sunil_Krishnan-A__Pankaj_Singh-A			sample	Sunil_Krishnan-A__Pankaj_Singh-A_31	31_Abeta 40 (1hr)	human cell line	0.113737	0.0504476	-0.0571216	-0.179511	-0.149133	0.0240548	-0.363744	-0.723343	-0.164444	0.221685	0.438013	0.292165	-0.00538947	0.0961047	0.339378	-0.0192603	0.101854	0.145349	-0.735138	0.138807	0.268584	0.181976	-0.0930109	-0.0912504	-0.462849	-0.213068	0.0328367	-0.622147	-0.129545	-0.218213	-0.303208	0.0904648	-0.0102722	-0.0276398	-0.343368	0.154747	-0.125487	-0.0706041	0.0429862	-0.245374	-0.370997
92	Sunil Krishnan-A (Pankaj Singh-A)	18_Sunil_Krishnan-A__Pankaj_Singh-A			sample	Sunil_Krishnan-A__Pankaj_Singh-A_32	32_Abeta 40 (1hr)	human cell line	0.0575798	0.0706907	0.0126164	-0.200877	-0.18987	0.130156	-0.263557	-0.459506	-0.16611	0.170616	0.470727	0.25941	-0.0139488	0.0697065	0.358111	0.148261	0.0160679	0.415315	-0.793207	0.0359412	0.37112	0.174212	0.107905	-0.180696	-0.2278	-0.112985	-4.29982e-05	-0.563172	-0.0580378	-0.312874	-0.192393	0.0839116	0.0285905	0.035008	-0.1534	0.153945	-0.0483471	-0.122591	-0.0336049	-0.152958	-0.461311
93	Sunil Krishnan-A (Pankaj Singh-A)	18_Sunil_Krishnan-A__Pankaj_Singh-A			sample	Sunil_Krishnan-A__Pankaj_Singh-A_33	33_Abeta 40 (1hr)	human cell line	0.139239	0.00847376	-0.0269431	-0.224235	-0.119406	0.0946267	-0.263567	-0.56203	-0.136291	0.150238	0.500153	0.260138	-0.0174383	0.115385	0.329392	0.111569	0.0203261	0.205566	-0.608365	0.0177408	0.305393	0.130246	0.149124	-0.214964	-0.475901	-0.234086	0.0455111	-0.496687	-0.00718138	-0.272704	-0.142433	0.0635753	0.04786	0.0412829	-0.348813	0.0615983	-0.00765089	-0.0551136	-0.0528986	-0.34767	-0.311843
94	Sunil Krishnan-A (Pankaj Singh-A)	18_Sunil_Krishnan-A__Pankaj_Singh-A			sample	Sunil_Krishnan-A__Pankaj_Singh-A_34	34_Abeta 40 + Insulin	human cell line	0.13658	-0.0221175	-0.0453434	-0.241397	-0.0597575	0.0585761	-0.303912	-0.450147	-0.0674332	0.176409	0.433608	0.217952	0.00573298	0.10689	0.417982	0.144335	0.00593141	0.362899	-0.720215	0.0545525	0.351756	0.164265	0.129586	-0.151213	-0.271817	-0.188341	0.0176239	-0.34708	-0.0192781	-0.235652	-0.14309	0.100539	0.0856839	0.0651367	-0.247283	0.125603	-0.00882518	-0.00217154	-0.0170568	-0.283875	-0.279214
95	Sunil Krishnan-A (Pankaj Singh-A)	18_Sunil_Krishnan-A__Pankaj_Singh-A			sample	Sunil_Krishnan-A__Pankaj_Singh-A_35	35_Abeta 40 + Insulin	human cell line	0.0902282	-0.122256	-0.1198	-0.263541	-0.0900583	0.014852	-0.260051	-0.395076	-0.000503805	0.364863	-0.0533928	0.216094	-0.0269098	0.128361	0.628256	0.0927046	-0.0500253	0.33853	-0.754176	-0.0340675	0.341211	0.278706	0.0541867	-0.225359	-0.304472	-0.119831	4.29982e-05	-0.355044	-0.0439733	-0.275341	-0.212952	0.0179771	0.120277	0.0570266	-0.407875	0.102261	-0.0657586	0.0211925	-0.0769327	-0.201596	-0.294112
96	Sunil Krishnan-A (Pankaj Singh-A)	18_Sunil_Krishnan-A__Pankaj_Singh-A			sample	Sunil_Krishnan-A__Pankaj_Singh-A_36	36_Abeta 40 + Insulin	human cell line	0.229066	-0.16608	-0.12635	-0.217894	-0.0506091	0.109674	-0.323222	-0.442995	0.0692387	0.291322	0.512025	0.214088	-0.031668	0.104727	0.436141	0.0437984	-0.0172342	0.292028	-0.320403	-0.0508821	0.307861	0.218402	0.0964273	-0.181544	-0.541705	-0.196656	-0.0443392	-0.342538	-0.0815065	-0.324773	-0.182386	-0.0702649	0.175589	0.0535326	-0.162339	0.0917013	-0.141955	-0.0242282	-0.0382266	-0.114998	-0.207646
109	Sunil Krishnan-A (Pankaj Singh-A)	18_Sunil_Krishnan-A__Pankaj_Singh-A			sample	Sunil_Krishnan-A__Pankaj_Singh-A_37	37_Abeta 42 (1hr)	human cell line	0.000618464	0.125979	-0.185287	-0.174983	-0.107596	0.0730349	-0.309221	-0.501178	-0.199263	0.297506	-0.0439567	0.15918	0.016076	0.0680676	-0.00536224	0.206157	0.140238	-0.0428905	-0.710794	0.0702013	0.336263	0.111383	-0.142685	-0.103915	-0.45976	-0.228109	0.110726	-0.627881	0.00937635	-0.335275	-0.381756	0.0823553	-0.128101	0.0984253	-0.283335	0.0956279	0.129266	-0.0773251	0.0288173	-0.298295	-0.287159
110	Sunil Krishnan-A (Pankaj Singh-A)	18_Sunil_Krishnan-A__Pankaj_Singh-A			sample	Sunil_Krishnan-A__Pankaj_Singh-A_38	38_Abeta 42 (1hr)	human cell line	0.0626341	0.0785422	-0.225045	-0.214675	-0.205577	0.0462316	-0.328366	-0.356311	-0.237713	0.186012	-0.0213546	0.060431	-0.0114502	0.0587734	0.0213468	0.172215	0.0910348	0.237945	-0.895627	-0.00766371	0.331876	0.085442	0.112095	-0.123674	-0.186658	-0.256098	0.0537664	-0.498389	-0.0188242	-0.338167	-0.175543	0.0818676	0.003115	0.0293908	-0.106251	-0.0146771	-0.0340846	-0.171499	-0.0477754	-0.355745	-0.464432
111	Sunil Krishnan-A (Pankaj Singh-A)	18_Sunil_Krishnan-A__Pankaj_Singh-A			sample	Sunil_Krishnan-A__Pankaj_Singh-A_39	39_Abeta 42 (1hr)	human cell line	0.0346635	0.100048	-0.101201	-0.217228	-0.154877	0.0805366	-0.273102	-0.398013	-0.185733	0.28413	0.0447687	0.0885141	-0.0296948	0.0574638	0.177239	0.172965	0.132617	0.462662	-0.928976	-0.0161917	0.28159	0.175807	0.0528145	-0.20813	-0.217989	-0.190695	0.0529137	-0.490983	-0.0822306	-0.340871	-0.220279	0.061261	0.0436592	0.0207706	-0.185928	0.0925973	-0.0446393	-0.0765537	-0.0246665	-0.290339	-0.43188
112	Sunil Krishnan-A (Pankaj Singh-A)	18_Sunil_Krishnan-A__Pankaj_Singh-A			sample	Sunil_Krishnan-A__Pankaj_Singh-A_40	40_Abeta 42 + Insulin	human cell line	0.0777816	0.106324	-0.230057	-0.20666	-0.149247	-0.0238183	-0.359371	-0.44752	-0.214789	0.241402	-0.00570082	0.064208	0.0286961	0.0267479	0.147253	0.164337	0.0225564	0.169584	-0.479891	0.00194436	0.234827	0.113896	0.175329	-0.102718	-0.174231	-0.238121	0.05682	-0.543197	-0.0923394	-0.37834	-0.16913	0.0904637	-0.0481494	0.0761567	-0.106473	-0.0134107	-0.0158214	-0.0341931	0.0986437	-0.304166	-0.474097
113	Sunil Krishnan-A (Pankaj Singh-A)	18_Sunil_Krishnan-A__Pankaj_Singh-A			sample	Sunil_Krishnan-A__Pankaj_Singh-A_41	41_Abeta 42 + Insulin	human cell line	-0.000618464	0.0656916	-0.118279	-0.176931	-0.121101	0.012855	-0.351752	-0.187951	-0.185027	0.229037	-0.0495021	-0.0210704	-0.0378704	0.106326	0.264329	0.109533	0.0784267	0.382951	-0.352629	-0.0485153	0.252956	0.191749	0.0574781	-0.127683	-0.270362	-0.197595	0.0315401	-0.506075	-0.029869	-0.351567	-0.238939	0.0209085	0.0893089	-0.0354527	-0.164387	0.0295144	-0.0756424	-0.019119	-0.0435575	-0.140909	-0.307546
114	Sunil Krishnan-A (Pankaj Singh-A)	18_Sunil_Krishnan-A__Pankaj_Singh-A			sample	Sunil_Krishnan-A__Pankaj_Singh-A_42	42_Abeta 42 + Insulin	human cell line	0.024331	-0.0116196	-0.137629	-0.197542	-0.103204	0.00396104	-0.39379	-0.292627	-0.254633	0.146065	0.00570082	0.0194177	0.0633514	0.0503314	0.239925	0.124805	0.0737984	0.253647	-0.42683	-0.0202109	0.275285	0.194028	0.112763	-0.13334	-0.36525	-0.252144	0.023	-0.525717	-0.114873	-0.338818	-0.226077	0.0712133	0.119872	0.0281426	-0.171898	0.00905341	-0.070568	-0.0926828	-0.0461475	-0.18085	-0.393552
[truncated: 265 more columns]
